# Supplementary material
Source: PubMed Central journal article supplement (PMC9329198)
Supplement: NIHMS1802311-supplement-Supp_materials.pdf [file NIHMS1802311-supplement-Supp_materials.pdf]

## **$\beta$ -Catenin sustains and is required for YES-associated protein oncogenic activity in cholangiocarcinoma**

Yi Zhang, Hongwei Xu, Guofei Cui, Binyong Liang, Xiangzheng Chen, Sungjin Ko, Silvia Affo, Xinhua Song, Liao Yi, Jianguo Feng, Pan Wang, Haichuan Wang, Meng Xu, Jingxiao Wang, Giovanni M. Pes, Silvia Ribback, Yong Zeng, Aatur Singhi, Robert F. Schwabe, Satdarshan P Monga, Matthias Evert, Liling Tang, Diego F Calvisi, Xin Chen

### **Supplementary Data**

#### **Table of Contents**

1. Supplementary Figures and Figure Legends S1-S49
2. Supplementary Tables S1-S8
3. Supplementary Material
4. Supplementary Materials and Methods

1. Supplementary Figures and Figure Legends

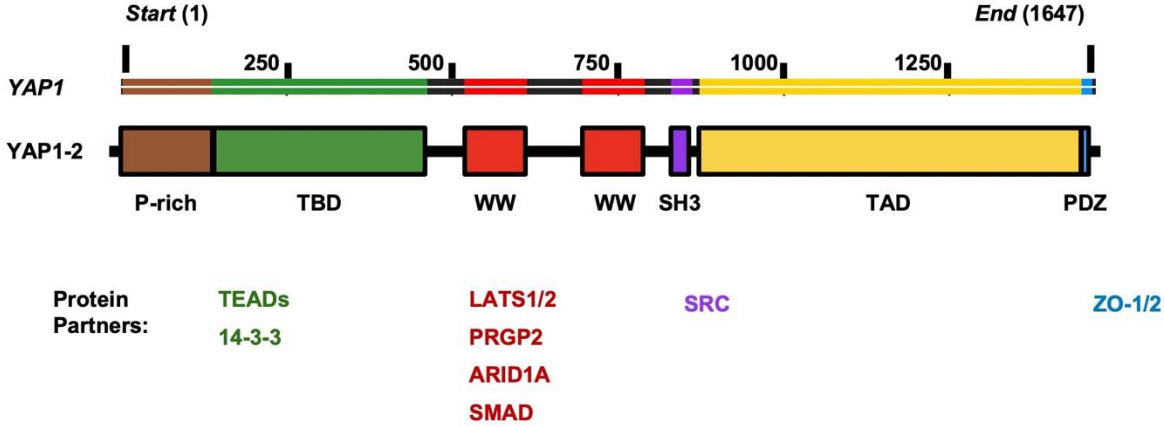

**Supplementary Figure 1. Modular structure of *YAP1* gene and YAP1-2 isoform.**

Illustration of the *YAP1* gene. Colors indicate the different functional domains. Prominent domains of YAP1-2 isoform include an N-terminal proline-rich domain, the TEAD binding domain (TBD), the WW domains, the SH3-binding domain, the transcriptional activation domain (TAD), and a C-terminal PDZ-binding domain. YAP protein partners <sup>1-3</sup> are colored by structural domains.

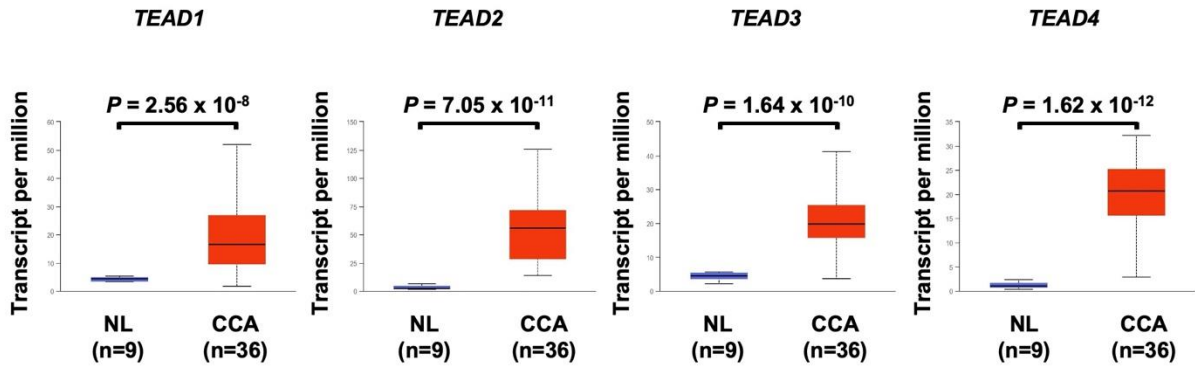

**Supplementary Figure 2. *TEAD1-4* genes are highly expressed in human CCA.**

Gene mRNA expression in human CCA tumors and corresponding non-tumorous surrounding livers based on the TCGA CHOL dataset. The pictures were downloaded from the UALCAN website (<http://ualcan.path.uab.edu/index.html>). Abbreviations: NL, Non-tumorous surrounding liver; CCA: Cholangiocarcinoma.

RBE

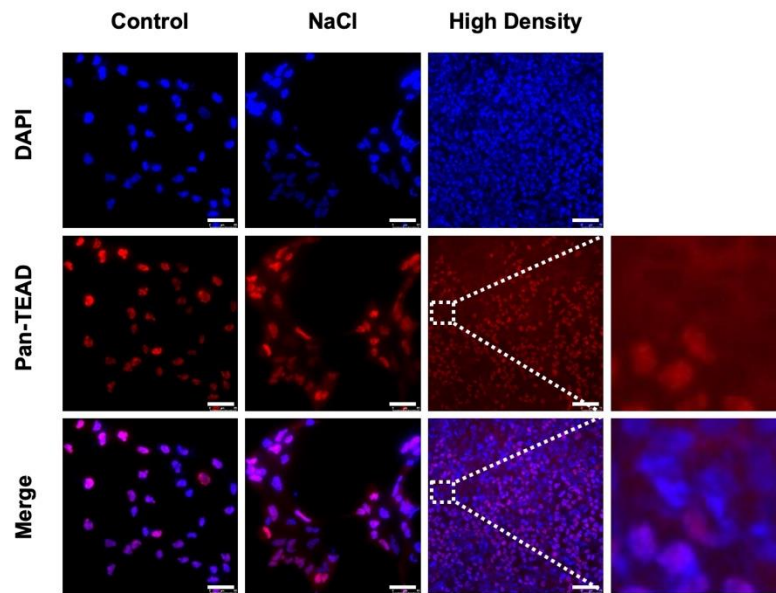

**Supplementary Figure 3. TEAD factors stably accumulate in the nucleus of RBE cells.**

Immunofluorescence staining of pan-TEAD proteins in RBE cells in normal condition or stimulated with environmental stresses. Immunofluorescence detected pan-TEADs subcellular localization following NaCl (200 mM; 8 h) or high cell density (72 h post-confluent) treatment. Scale bar: 50  $\mu\text{m}$ .

HUCCT-1

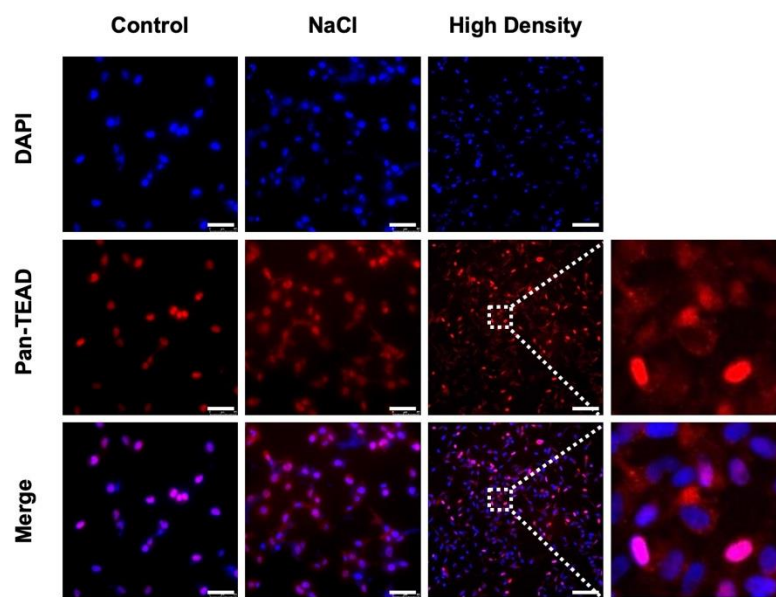



**Supplementary Figure 4. TEAD factors stably accumulate in the nucleus of HUCCT-1 cells.**

Immunofluorescence staining of pan-TEAD proteins in HUCCT-1 cells in normal conditions or stimulated with environmental stresses. Immunofluorescence detected pan-TEADs subcellular localization following NaCl (200 mM; 8 h) or high cell density (72 h post-confluent) treatment.

Scale bar: 50  $\mu$ m.

KKU156

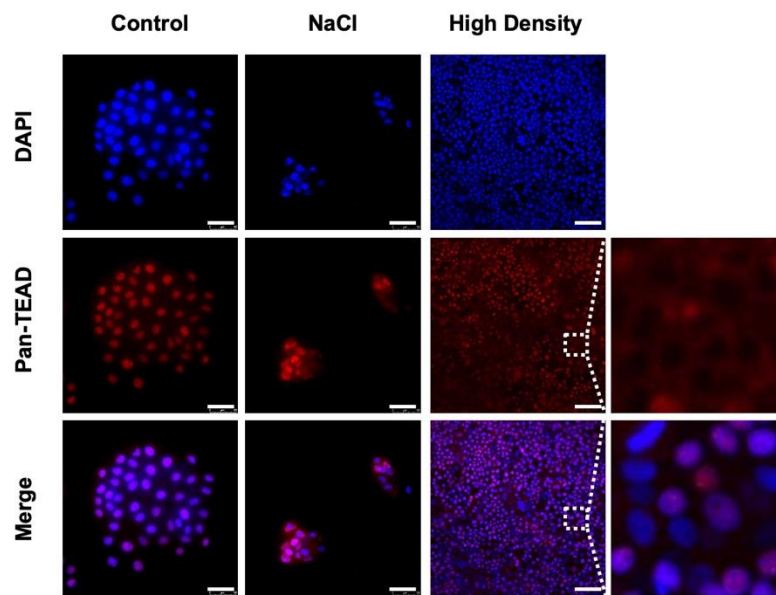

**Supplementary Figure 5. TEAD factors stably accumulate in the nucleus of K KU156 cells.**

Immunofluorescence staining of pan-TEAD proteins in K KU156 cells in normal condition or stimulated with environmental stresses. Immunofluorescence detected pan-TEADs subcellular localization following NaCl (200 mM; 8 h) or high cell density (72 h post-confluent) treatment.

Scale bar: 50  $\mu$ m.

***Akt/YapS94A***

**Gross**

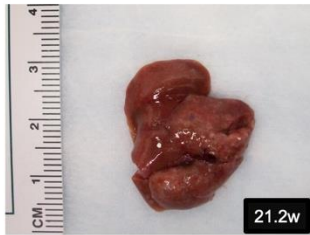

**H&E (40X)**

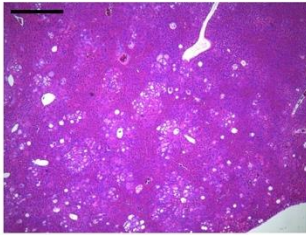

**CK19 (40X)**

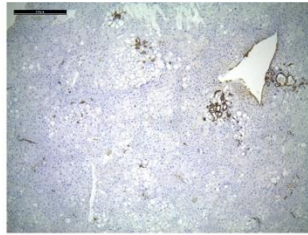

**HA-TAG (100X)**

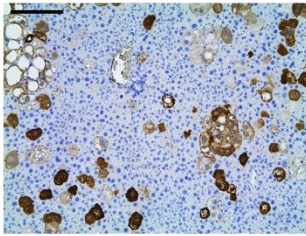

**KI67 (400X)**

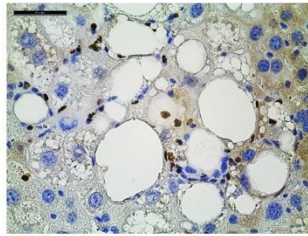

**Supplementary Figure 6. Blockade of Yap/TEADs prevents iCCA formation in mice.**

AKT-induced hepatic steatosis but not tumor development could be observed in the liver tissue from *Akt/YapS94A* (F21.2w.p.i) mice. Representative gross images, H&E, and immunohistochemistry for CK19, HA-TAG, and KI67 of liver tissue. Scale bar: 500  $\mu\text{m}$  (40x), 100  $\mu\text{m}$  (100x), and 50  $\mu\text{m}$  (400x). Abbreviations: H&E, hematoxylin and eosin staining; w.p.i, weeks post-injection.

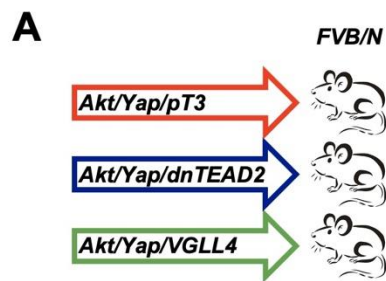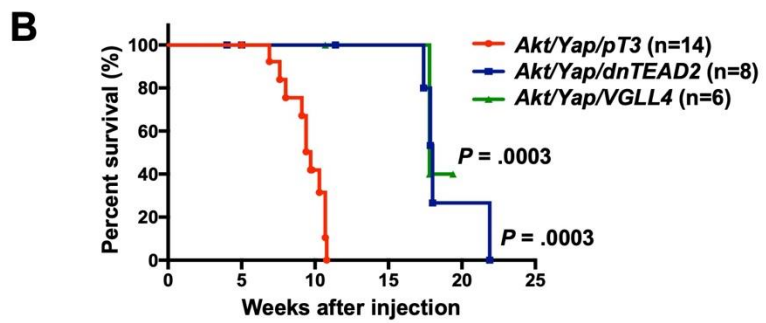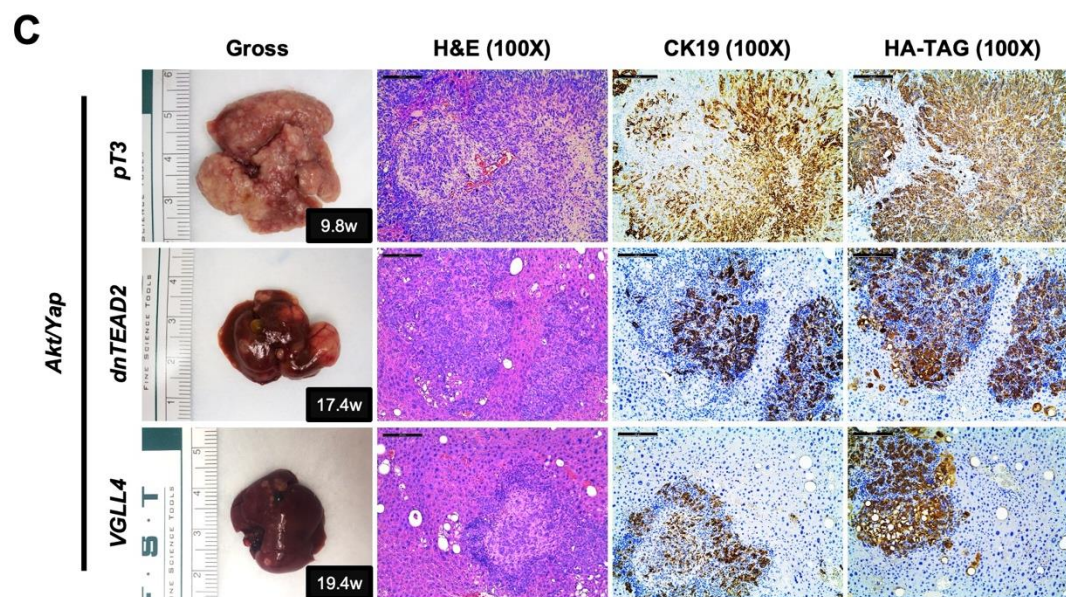

**Supplementary Figure 7. Inhibition of Yap/TEADs robustly suppresses iCCA development in mice.**

(A) Study design. *FVB/N* mice were subjected to HTVi of either *Akt/Yap/pT3* (n=14), *Akt/Yap/dnTEAD2* (n=8) or *Akt/Yap/VGLL4* (n=6) plasmids. (B) Mouse survival curves. (C) Representative gross images, H&E, and immunohistochemistry for CK19 and HA-TAG of liver sections from *Akt/Yap/pT3* (9.8w.p.i), *Akt/Yap/dnTEAD2* (M17.4w.p.i), and *Akt/Yap/VGLL4* (M19.4w.p.i) mice. Scale bar: 100  $\mu$ m (100x). Abbreviations: H&E, hematoxylin and eosin staining; M, male; F, female; w.p.i, weeks post-injection.

**A.**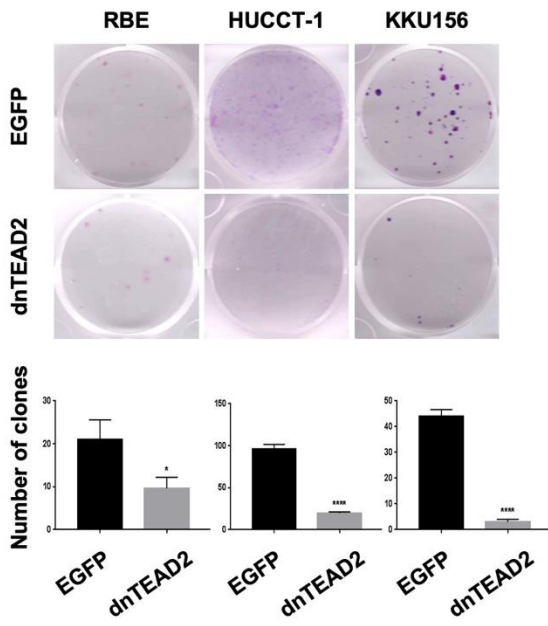**B.**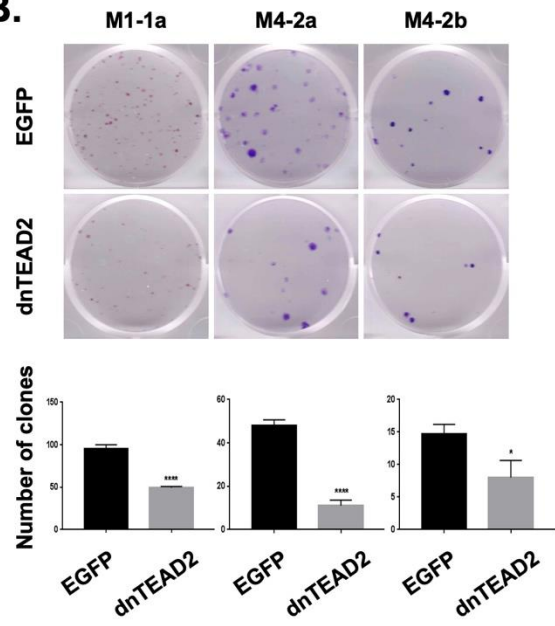**C.**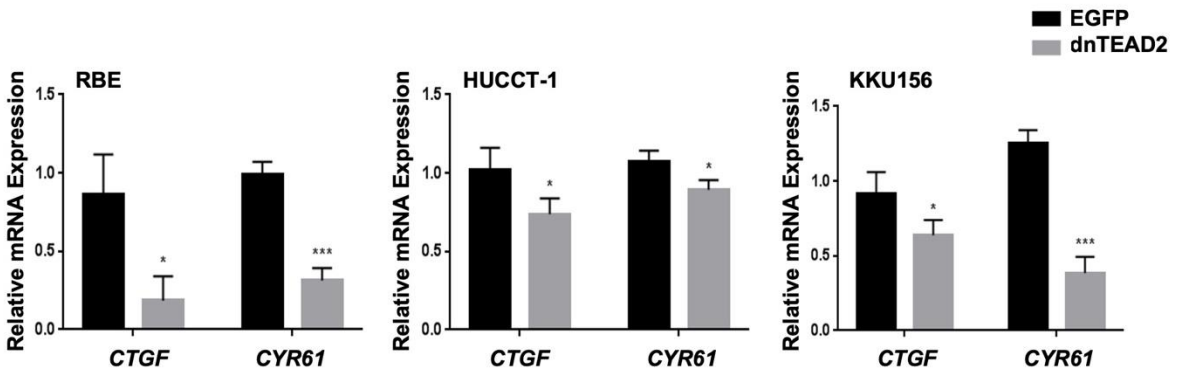



**Supplementary Figure 8. Overexpression of dnTEAD2 suppresses iCCA growth and Yap target expression in intrahepatic cholangiocarcinoma (iCCA) cell lines.**

(A, B) (A) Human CCA and (B) mouse iCCA cells were transfected with plenti-EGFP or plenti-dnTEAD2 plasmids. The colony formation assay was performed to detect the ability of a single cell to grow into a colony. Quantification of colonies in each group. (C) mRNA expression of *CTGF* and *CYR61*. Data were analyzed by the Mann-Whitney test. Statistical significance: \* $P < .05$ , \*\* $P < .01$ , \*\*\*\* $P < .0001$ .

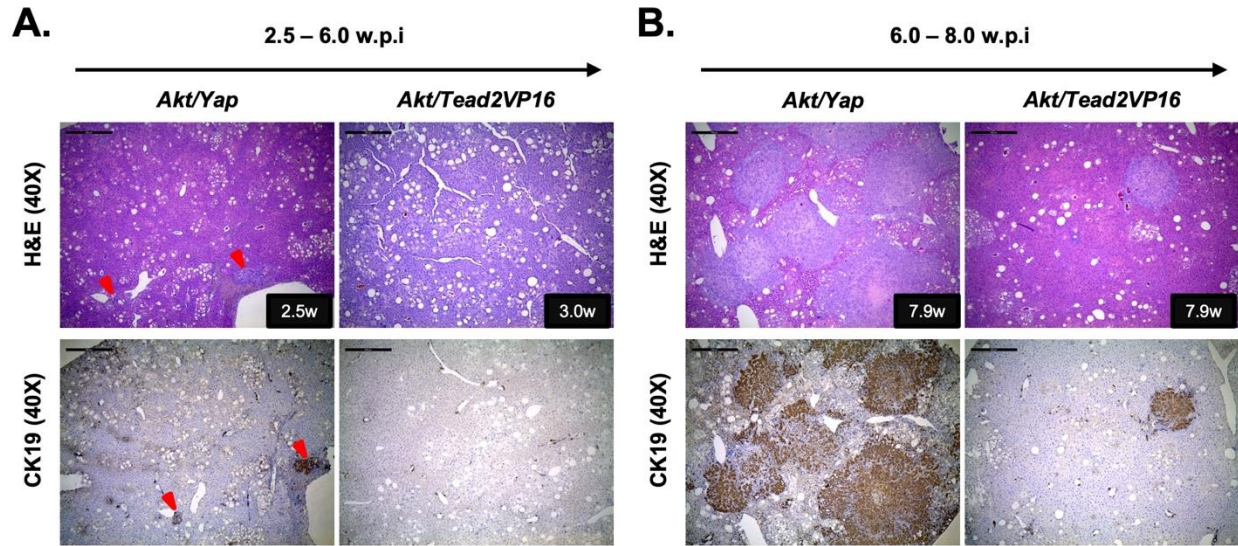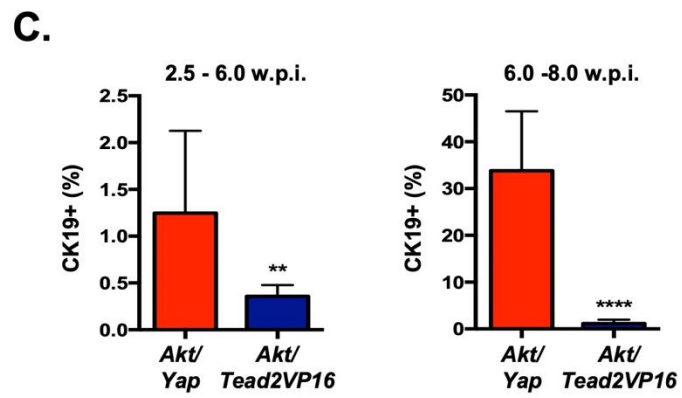

**Supplementary Figure 9. *Akt/Tead2VP16* mice exhibit a significant delay of tumor initiation compared with *Akt/Yap* mice.**

(A, B) H&E and immunohistochemical staining of CK19 in liver tissues from *Akt/Yap* and *Akt/Tead2VP16* mice at (A) 2.5 to 6.0 w.p.i. or (B) 6.0 to 8.0 w.p.i. (C) Quantification of the CK19 positive area in liver sections from the depicted mice. Statistical significance: \*\* $P < .01$ , \*\*\*\* $P < .0001$ . Abbreviations: H&E, hematoxylin and eosin staining; w.p.i, weeks post-injection.

**A.**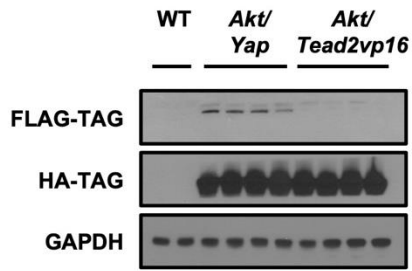**B.**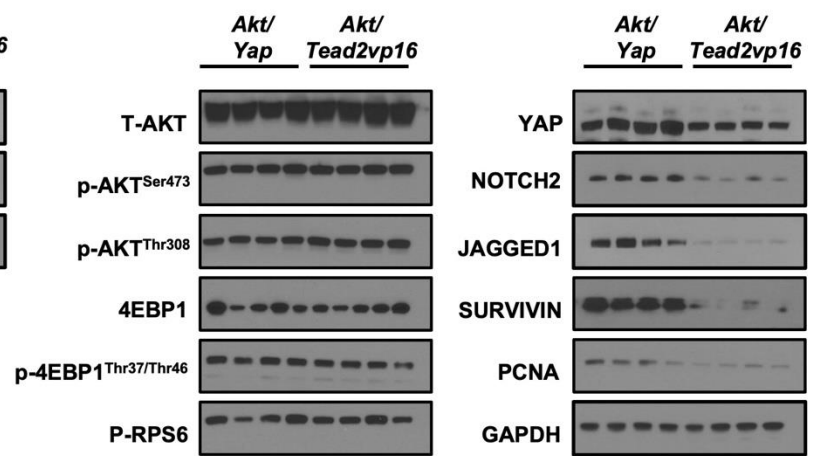**C.**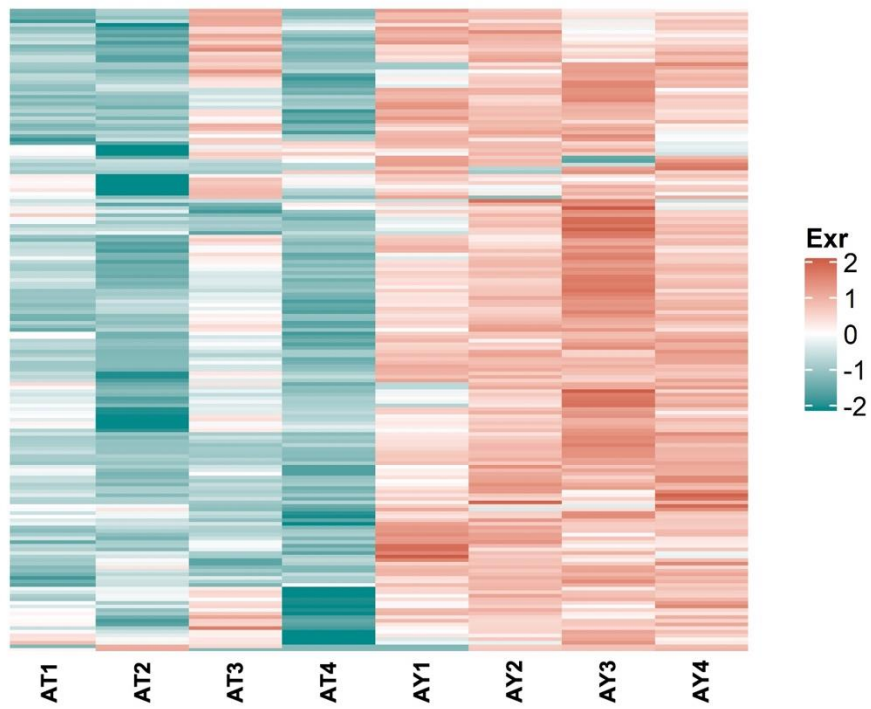

**Supplementary Figure 10. Molecular differences between *Akt/Yap* iCCA and *Akt/Tead2VP16* iCCA lesions.**

(A) Western blot analysis revealing the overexpression of exogenous tagged oncogenes in *Akt/Yap* and *Akt/Tead2VP16* iCCA. (B) Western blot analysis of AKT and NOTCH signaling levels, YAP,  $\beta$ -Catenin, and cell proliferation-related proteins of tumor tissues from *Akt/Yap* and *Akt/Tead2VP16* mice. GAPDH was used as a loading control. (C) Heatmap of the expression of Yap target genes in *Akt/Yap* and *Akt/Tead2VP16* iCCA lesions. Red, up-regulated; green, down-regulated. Abbreviations: AT, *Akt/Tead2VP16* iCCA; AY, *Akt/Yap* iCCA.

**A**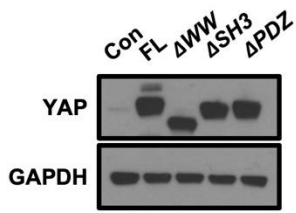**B**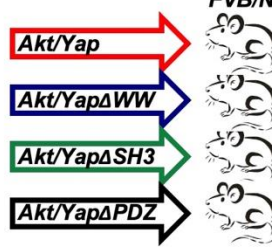**C**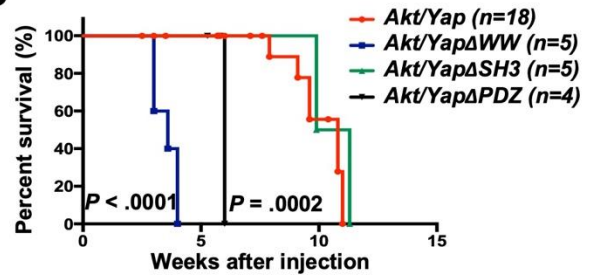**D**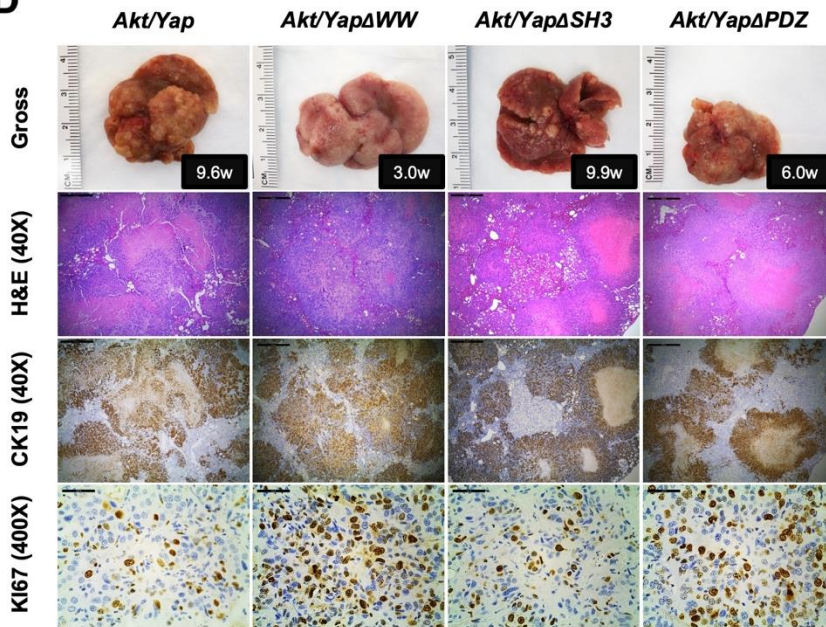**E**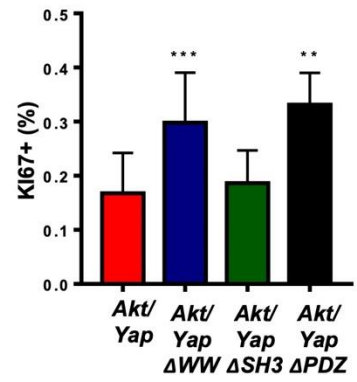

**Supplementary Figure 11. YAP WW, SH3, and PDZ domains play inhibitory functions in *Akt/Yap* tumorigenesis.**

(A) Western blot showing the expression of YAP and truncated YAP mutants. 293FT cells were transfected with full-length YAP (FL) or truncated YAP, progressively deleting WW, SH3, or PDZ domain. Untreated 293FT cells were used as a control (Con). (B) Study design. FVB/N mice were subjected to HTVi of either *Akt/Yap* (control, n=18), *Akt/Yap $\Delta$ WW* (n=5), *Akt/Yap $\Delta$ SH3* (n=5), or *Akt/Yap $\Delta$ PDZ* (n=4) plasmids. The indicated mice, *Akt/YapS94A* (Fig.1B), and *Akt/Tea2VP16* (Fig.2B) mice were generated in parallel. (C) Mouse survival curves. (D) Representative gross images, H&E, and immunohistochemistry for CK19 and KI67 of liver sections from *Akt/Yap* (F9.6w.p.i), *Akt/Yap $\Delta$ WW* (M3.0w.p.i), *Akt/Yap $\Delta$ SH3* (M9.9w.p.i), or *Akt/Yap $\Delta$ PDZ* (F6.0w.p.i) mice. (E) Quantification of KI67 positive nuclei in the indicated mouse livers. Statistical significance: \*\* $P < .01$ , \*\*\*  $P < .001$ . Scale bar: 500  $\mu$ m (40x) and 50  $\mu$ m (400x). Abbreviations: H&E, hematoxylin and eosin staining; w.p.i, weeks post-injection.

**A**

| Group    | N Genes | Direction | FC   | P Value   |
|----------|---------|-----------|------|-----------|
| AT vs AY | 890     | Down      | >2.0 | $P < .05$ |
| AT vs AY | 464     | Up        | >2.0 | $P < .05$ |

**B**

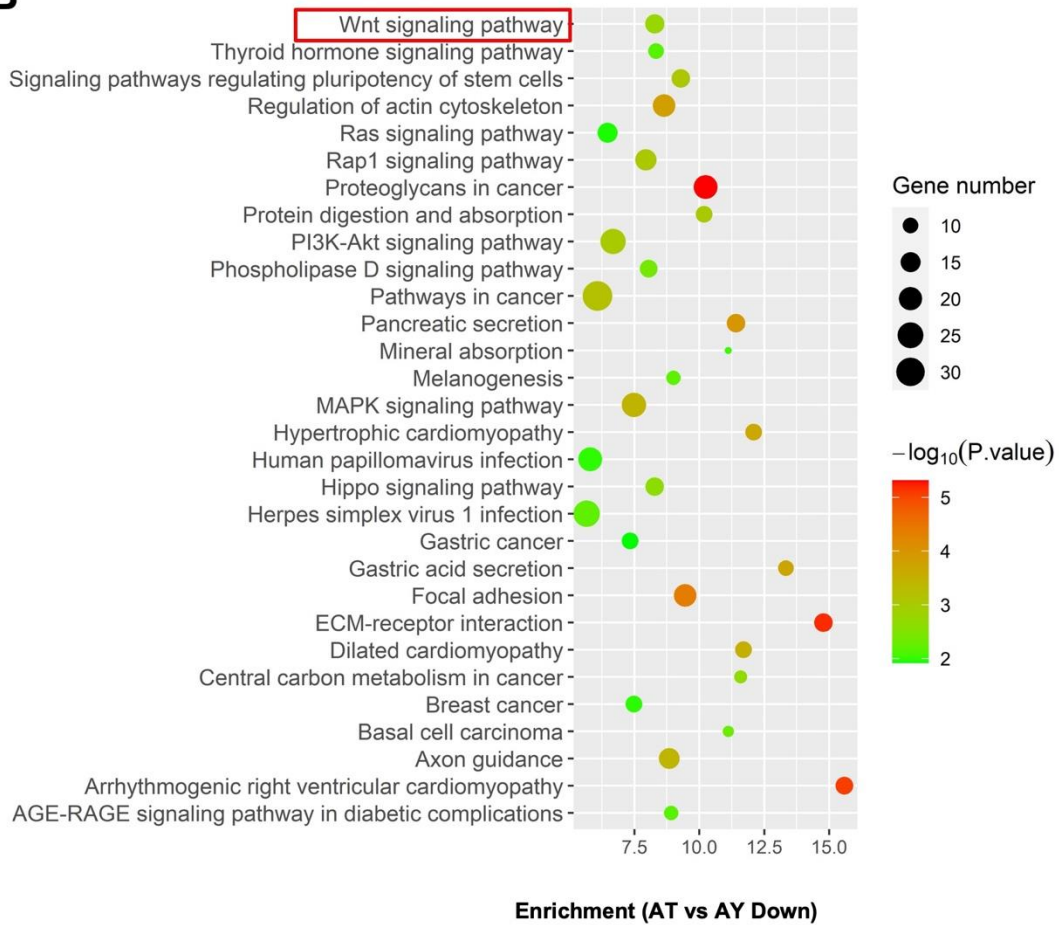



**Supplementary Figure 12. RNA sequencing of *Akt/Tead2VP16* and *Akt/Yap* iCCA lesions.**

(A) Significant downregulated and upregulated genes in *Akt/Tead2VP16* iCCA lesions when compared with *Akt/Yap* iCCA lesions are shown in the Table. (B) KEGG analysis of downregulated genes in *Akt/Tead2VP16* iCCA lesions. Genes were ranked by *P*-value.

Abbreviations: AT, *Akt/Tead2VP16* iCCA; AY, *Akt/Yap* iCCA; FC, fold change.

**A**

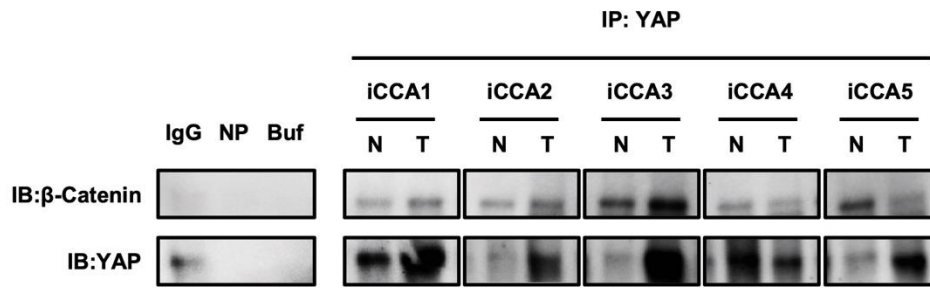

**B**

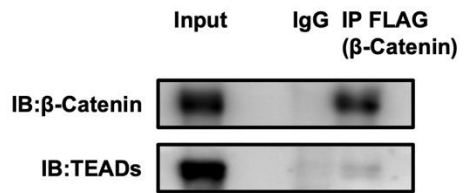

**Supplementary Figure 13.  $\beta$ -Catenin interacts with YAP and TEAD factors in human intrahepatic cholangiocarcinomas (iCCAs).**

(A) Human liver tissues were homogenized in RIPA buffer. Lysates were precleared with Protein A/G PLUS-Agarose and incubated with anti-YAP antibody or IgG. Western blotting of endogenous  $\beta$ -Catenin protein coimmunoprecipitating with endogenous YAP protein (IP) from human liver tissues extracts. IgG co-precipitating protein (IgG), protein A/G PLUS-Agarose conjugated with antibody (NP), and RIPA buffer (Buf) were loaded as the negative control. (B) Co-immunoprecipitation assays to detect  $\beta$ -Catenin and TEADs interaction. Lysates from RBE cells overexpressed with FLAG- $\beta$ -Catenin-WT were subjected to immunoprecipitation with an anti-FLAG antibody. Western blotting of  $\beta$ -Catenin protein coimmunoprecipitating with endogenous Pan-TEADs protein (IP) from cell extracts. Abbreviations: N, surrounding non-tumorous liver; T: intrahepatic cholangiocarcinoma.

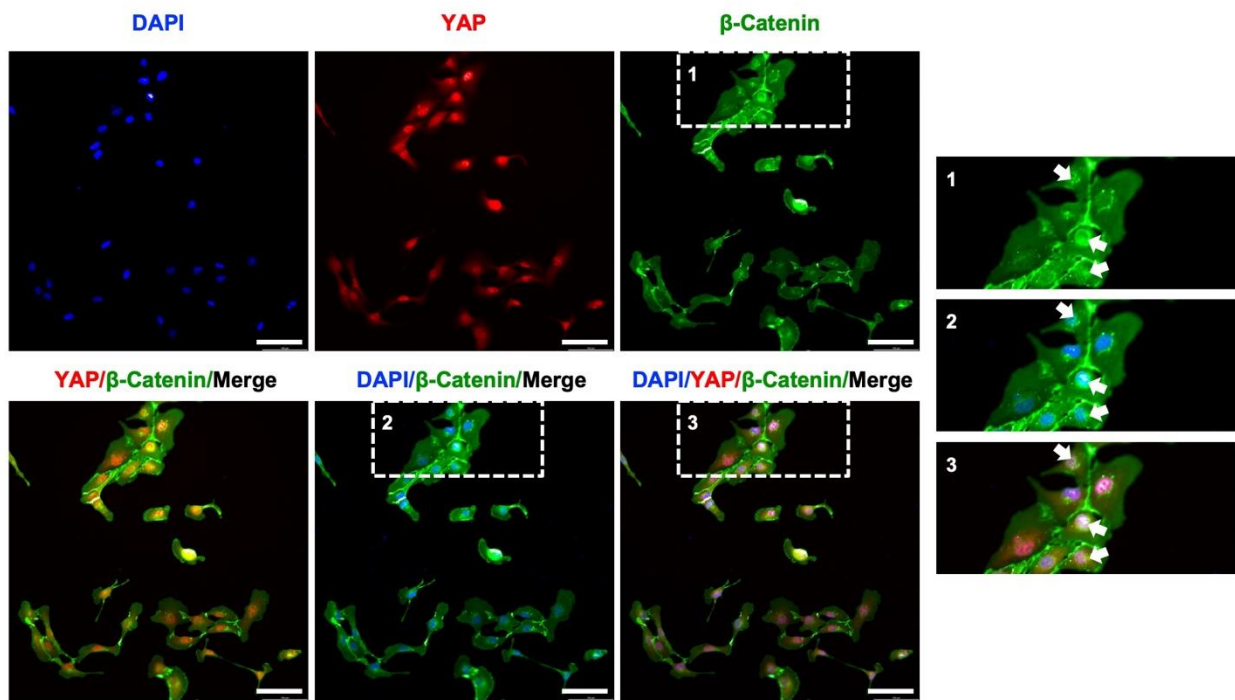

**Supplementary Figure 14. YAP and  $\beta$ -Catenin nuclear co-localization occurs in a small subset of RBE cells.**

Immunofluorescence staining of DAPI (Blue), YAP (Red), and  $\beta$ -Catenin (Green) in RBE cells. White arrows in panel 1 and panel 2 indicate positive  $\beta$ -Catenin nuclear staining. White arrows in panel 3 indicate YAP and  $\beta$ -Catenin nuclear co-localization. Scale bar: 100  $\mu$ m.

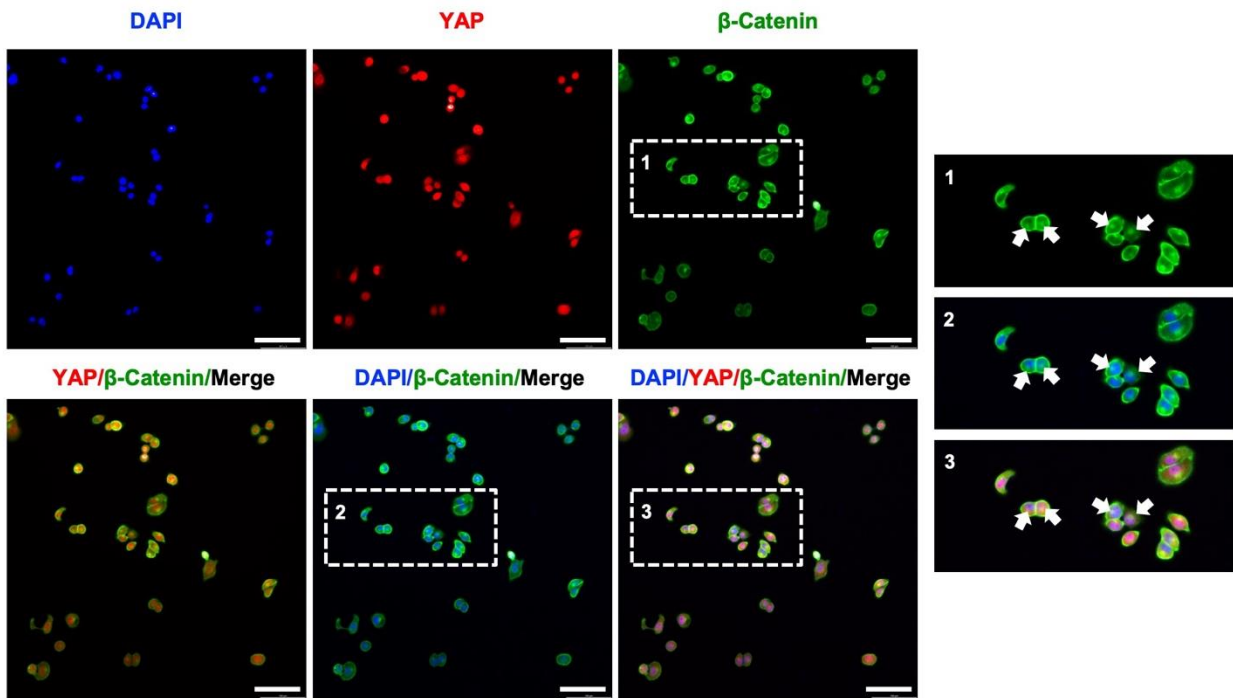

**Supplementary Figure 15. YAP and  $\beta$ -Catenin nuclear co-localization occurs in a small subset of K KU156 cells.**

Immunofluorescence staining of DAPI (Blue), YAP (Red), and  $\beta$ -Catenin (Green) in K KU156 cells. White arrows in panel 1 and panel 2 indicate positive  $\beta$ -Catenin nuclear staining. White arrows in panel 3 indicate YAP and  $\beta$ -Catenin nuclear co-localization. Scale bar: 100  $\mu$ m.





**Supplementary Figure 16. Direct interaction of YAP and  $\beta$ -Catenin in the cytoplasm and nucleus of *Akt/Yap* iCCAs.**

(A) Immunofluorescence staining of DAPI (Blue), YAP (Red), and  $\beta$ -Catenin (Green) in *Akt/Yap* iCCA sections. White arrows indicate YAP and  $\beta$ -Catenin nuclear co-localization. (B) The cytoplasmic and nuclear extracts from *Akt/Yap* iCCAs were isolated and subjected to immunoprecipitation with anti-FLAG beads. Lysates from *FVB/N* wildtype mouse livers were used as a control. Co-precipitating proteins were visualized by Western blotting. Scale bar: 100  $\mu$ m. Abbreviations: WT, wildtype; Cyto, cytoplasm; Nuc, nucleus.

**H&E (200X)**

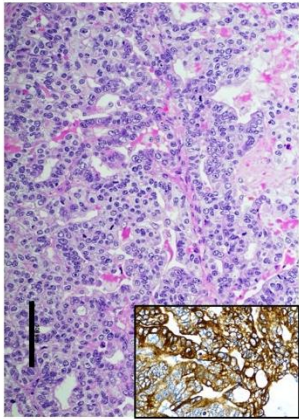

**$\beta$ -Catenin (200X)**

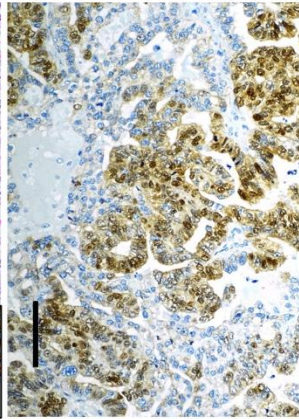

**Non-p- $\beta$ -Catenin (200X)**

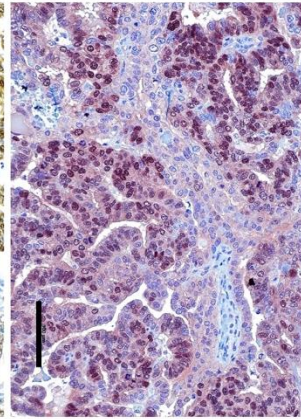

**YAP (200X)**

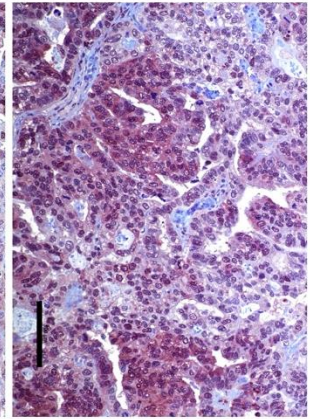

**Supplementary Figure 17. Concomitant nuclear and cytoplasmic immunoreactivity for  $\beta$ -catenin and YAP in human intrahepatic cholangiocarcinoma (iCCA).**

H&E and immunohistochemical staining of total  $\beta$ -catenin, activated/non-phosphorylated  $\beta$ -Catenin (non-p- $\beta$ -Catenin), and YAP in human iCCA sections. CK19 was used as a biliary marker (inset). Scale bar: 100 $\mu$ m (200X). Abbreviation: H&E, hematoxylin and eosin staining.

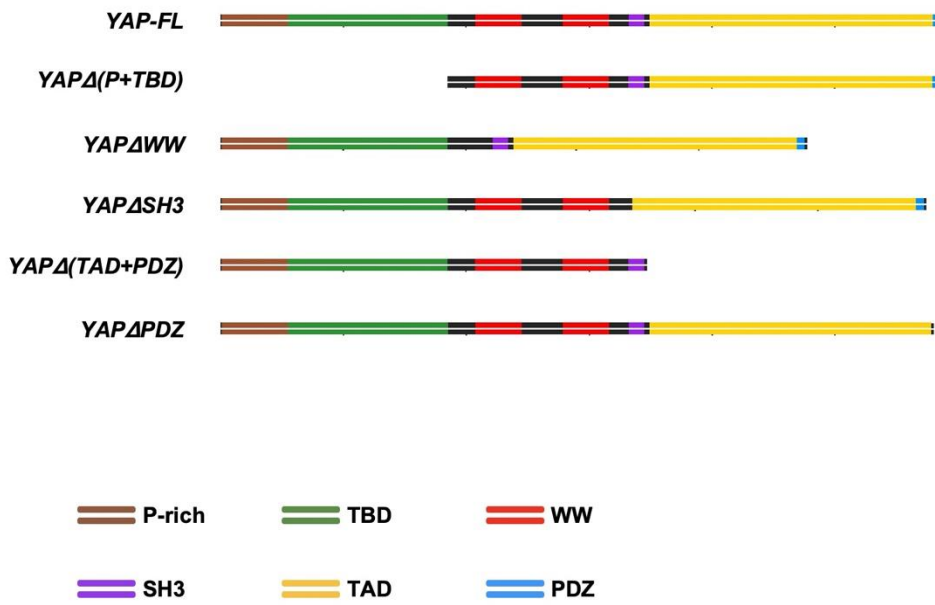

**Supplementary Figure 18. Schematic representation of *YAP* deletion mutants.**

Panels showing the full-length *YAP* (*YAP-FL*) and *YAP* deletion mutants, progressively deleting the P-rich and TEADs binding (TBD) domains (*YAP* $\Delta$ (*P+TBD*)), two WW domains (*YAP* $\Delta$ *WW*), SH3-binding domain (*YAP* $\Delta$ *SH3*), the transcriptional activation (TAD) and PDZ-binding domains (*YAP* $\Delta$ (*TAD+PDZ*)), and a C-terminal PDZ-binding domain (*YAP* $\Delta$ *PDZ*).

pLKO.1-sh $\beta$ -Catenin

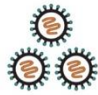

→ RBE cells →

Experiment 1

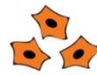

sh $\beta$ Cat-1

Experiment 2

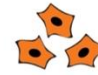

sh $\beta$ Cat-2

Experiment 3

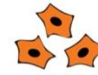

sh $\beta$ Cat-3

pLKO.1-shCon

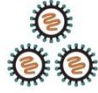

→ RBE cells →

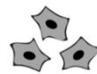

shCon-1

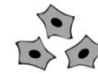

shCon-2

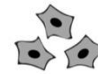

shCon-3

**Supplementary Figure 19. Study design of RNA sequencing in  $\beta$ -Catenin knockdown iCCA cell lines.**

Human RBE cells transfected with pLKO.1-shCon (shCon, n=3) or pLKO.1-sh $\beta$ -Catenin (sh $\beta$ Cat, n=3) through lentivirus transduction were prepared for RNA sequencing.

**A**

| Group                   | N Genes | Direction | FC   | P Value   |
|-------------------------|---------|-----------|------|-----------|
| sh $\beta$ Cat vs shCon | 3338    | Down      | >1.3 | $P < .05$ |
| sh $\beta$ Cat vs shCon | 3259    | Up        | >1.3 | $P < .05$ |

**B**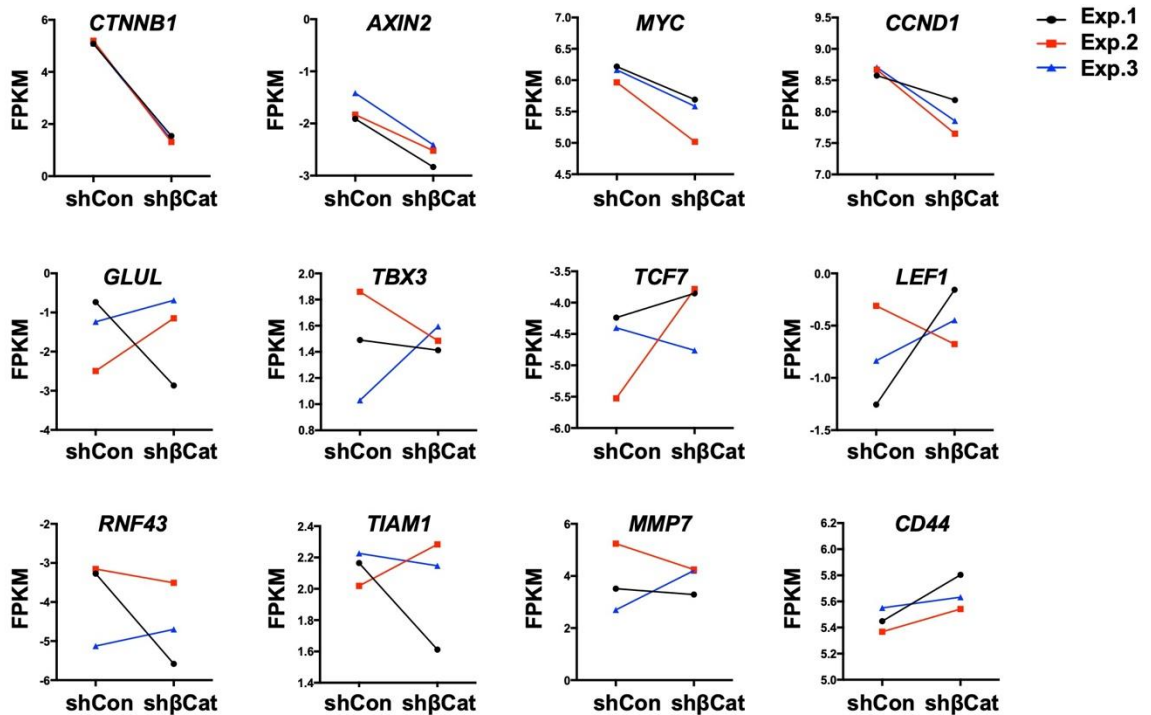**C**

| GO:ID       | Term                                        | N genes downregulated by sh $\beta$ Cat | P value |
|-------------|---------------------------------------------|-----------------------------------------|---------|
| GO: 0060070 | Canonical Wnt signaling pathway (358 genes) | 77                                      | ns      |



**Supplementary Figure 20. Silencing of  $\beta$ -Catenin in iCCA does not affect the expression of canonical Wnt targets.**

(A) Significant downregulated and upregulated genes in  $\beta$ -Catenin knockdown RBE cells were shown in Table. (B) Fragments per kilobase of transcript per million mapped reads (FPKM) results of *CTNNB1*, *AXIN2*, *MYC*, *CCND1*, and liver-specific Wnt canonical target genes expression. (C) RNA sequencing analysis showing that Wnt canonical pathway-related genes were not enriched in those genes downregulated by  $\beta$ -Catenin knockdown. Abbreviations: FC, fold change; ns, not significant.

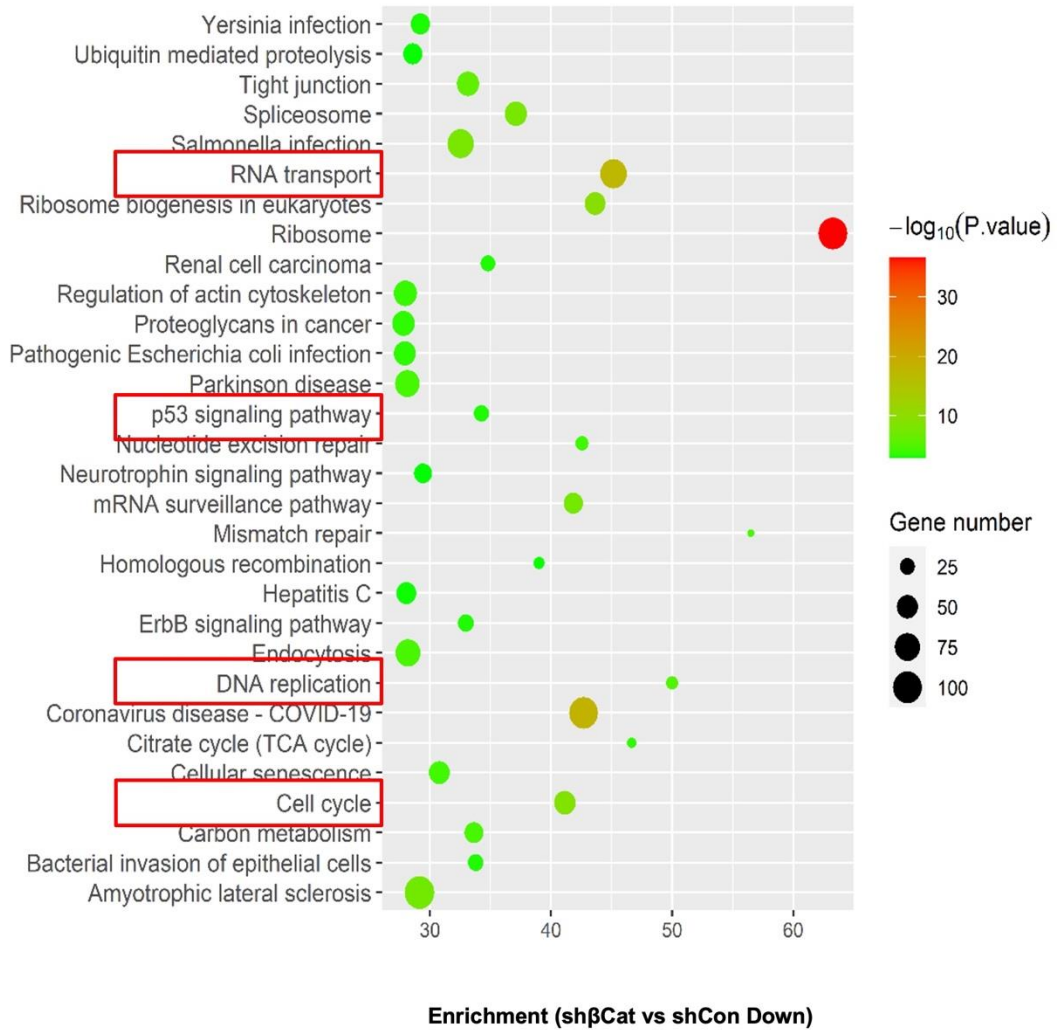

**Supplementary Figure 21. KEGG analysis of downregulated genes in  $\beta$ -Catenin silenced RBE cells.**

$\beta$ -Catenin silencing leads to the downregulation of genes enriched in RNA transport, p53 signaling pathway, DNA replication, and cell cycle pathway (Red inserts). Genes were ranked by *P*-value.

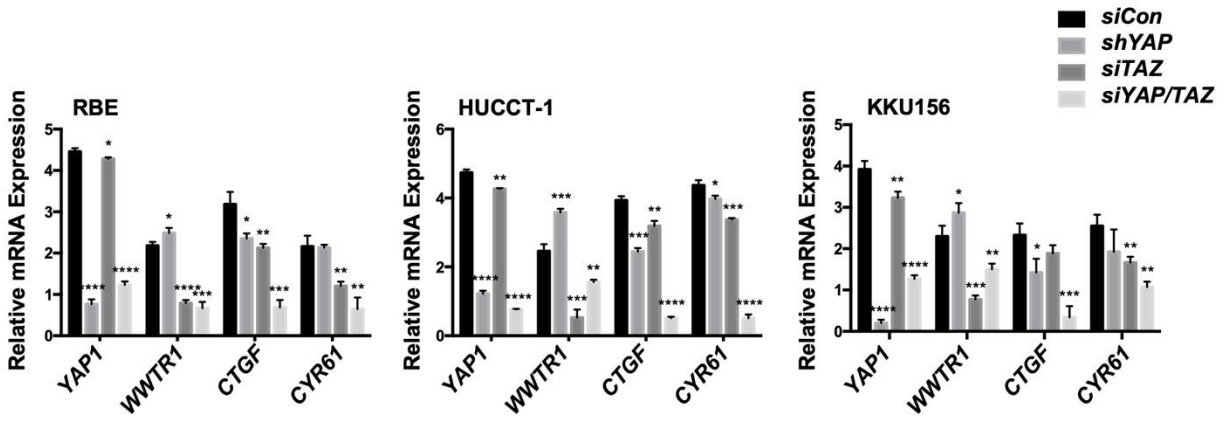

**Supplementary Figure 22. YAP and TAZ have redundant roles in regulating iCCA.**

RBE, HUCCT-1, and KKU156 cells were transfected with *siCon*, *siYAP*, *siTAZ*, or *siYAP/siTAZ* and cultured for 48 hours. qRT-PCR detected the mRNA expression of *YAP1*, *TAZ(WWTR1)*, *CTGF*, and *CYR61*. Data were analyzed by the Mann-Whitney test. Statistical significance: \* $P < .05$ , \*\* $P < .01$ , \*\*\* $P < .001$ , \*\*\*\* $P < .0001$ . Abbreviations: *siCon*, scrambled small interfering RNA; *siYAP*, small interfering RNA targeting *YAP*; *siTAZ*, small interfering RNA targeting *TAZ*.

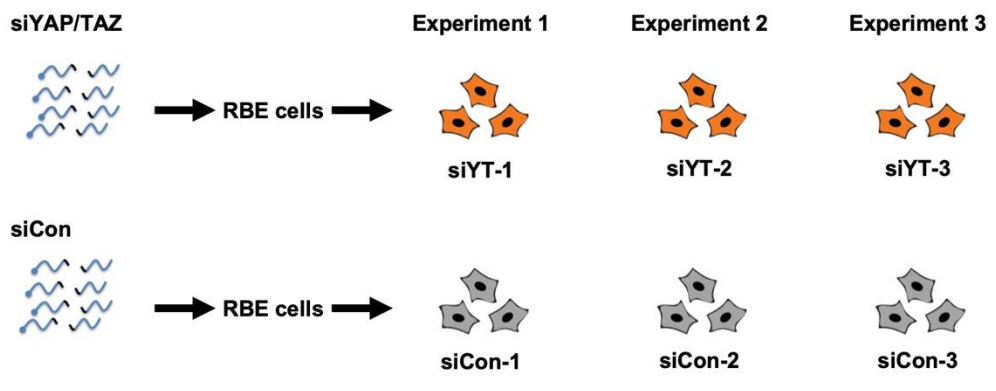

**Supplementary Figure 23. Study design of RNA sequencing analysis in YAP/TAZ silenced iCCA cells.**

Human RBE cells transfected with scrambled *siRNA* (siCon, n=3) or *siRNA* targeting *YAP/TAZ* (siYT, n=3) were prepared for RNA sequencing. Abbreviation: *siCon*, scrambled small interfering RNA.

**A**

| Group         | N Genes | Direction | FC   | P Value   |
|---------------|---------|-----------|------|-----------|
| siYT vs siCon | 2519    | Down      | >1.3 | $P < .05$ |
| siYT vs siCon | 1994    | Up        | >1.3 | $P < .05$ |

**B**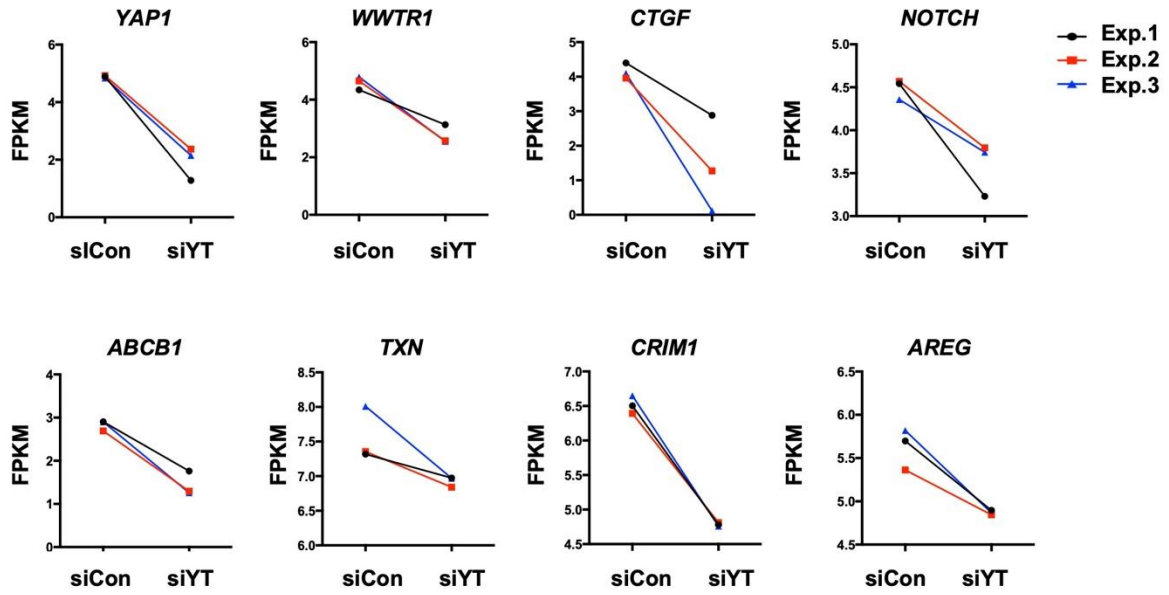



**Supplementary Figure 24. YAP/TAZ silencing leads to consistent downregulation of a set of genes identified in  $\beta$ -Catenin silenced iCCA cells.**

(A) Significant downregulated and upregulated genes in YAP/TAZ silenced RBE cells were shown in Table. (B) Fragments per kilobase of transcript per million mapped reads (FPKM) results of *YAP1*, *WWTR1*, *CTGF*, *CYR61*, *NOTCH2*, *ABCB1*, *TXN*, *CRIM1*, and *AREG* expression. Abbreviation: FC, fold change.

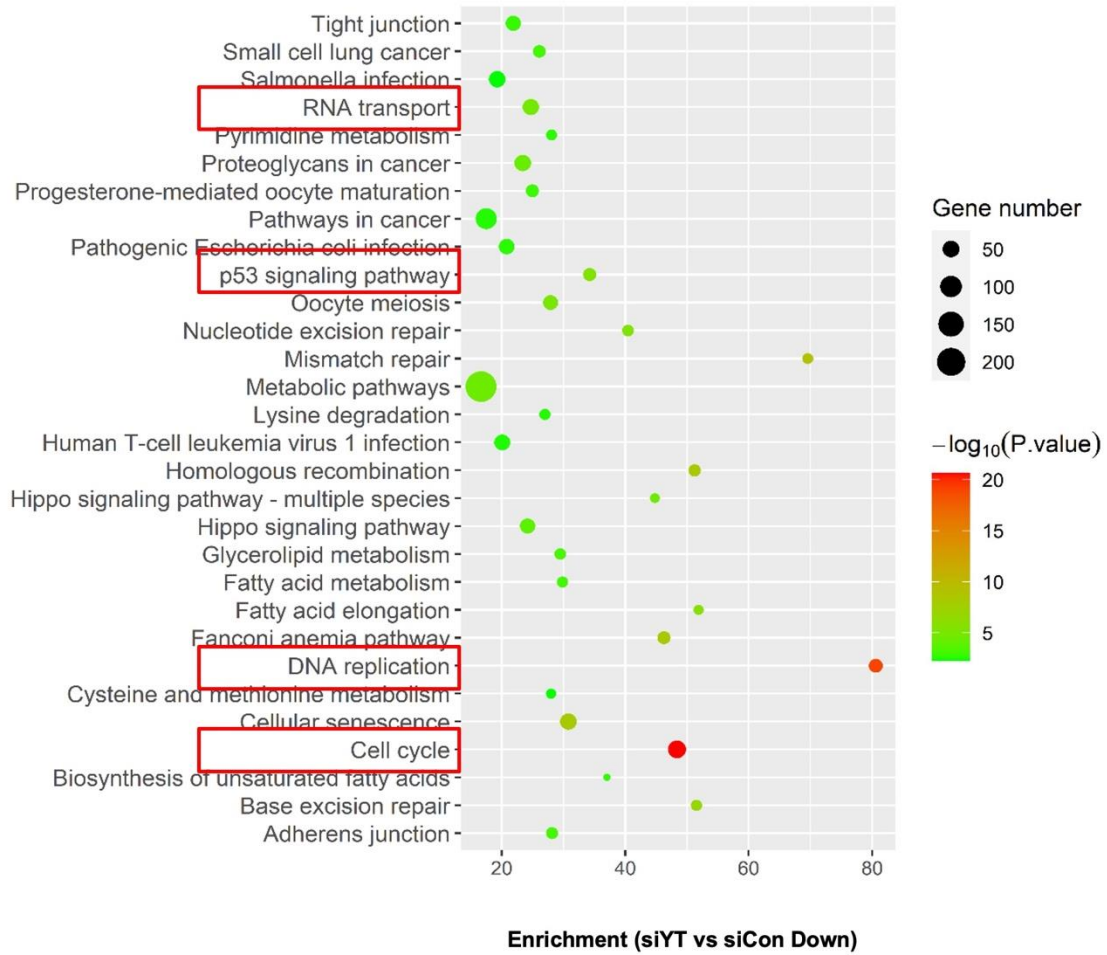

**Supplementary Figure 25. KEGG analysis of downregulated genes in YAP/TAZ silenced RBE cells.**

YAP/TAZ knockdown leads to downregulation of genes enriched in RNA transport, p53 signaling pathway, DNA replication, and cell cycle pathway (Red inserts). Genes were ranked by *P*-value.

**A.**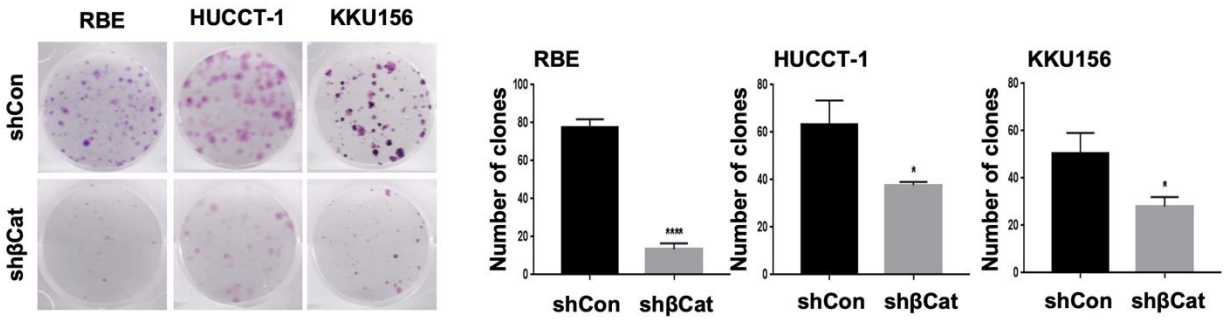**B.**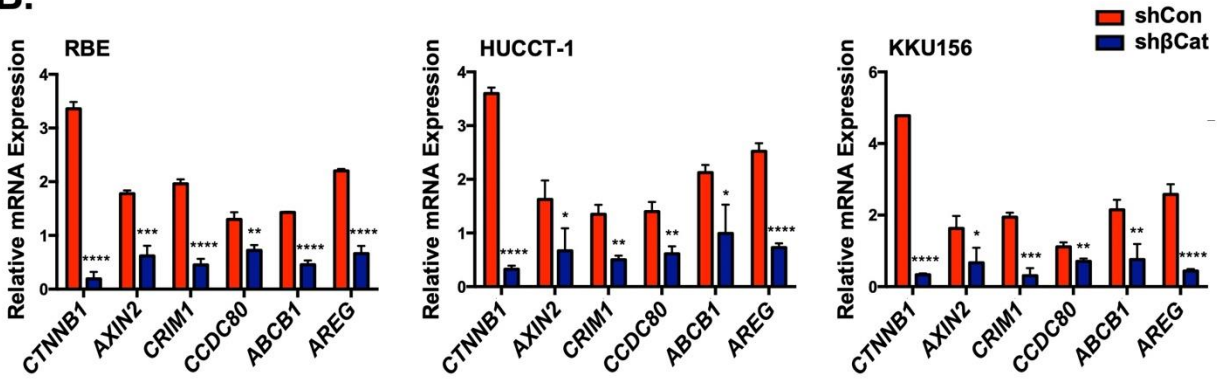

**Supplementary Figure 26. Silencing of  $\beta$ -Catenin in iCCA inhibits cell growth and YAP targets transcription in human intrahepatic cholangiocarcinoma (iCCA) cell lines.**

Human iCCA cells were stably transfected with pLKO.1-shCon or pLKO.1-sh $\beta$ -Catenin through lentivirus transduction, respectively. (A) Representative images of colony formation assays in transfected RBE, HUCCT-1, and KKU156 cells. Quantification of colonies in each group. (B) mRNA expressions of *CTNNB1*, *AXIN2*, and YAP target genes. Data were analyzed using the Mann-Whitney test. Statistical significance: \* $P < .05$ , \*\* $P < .01$ , \*\*\* $P < .001$ , \*\*\*\* $P < .0001$ .

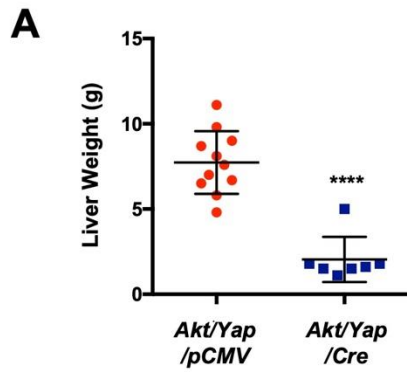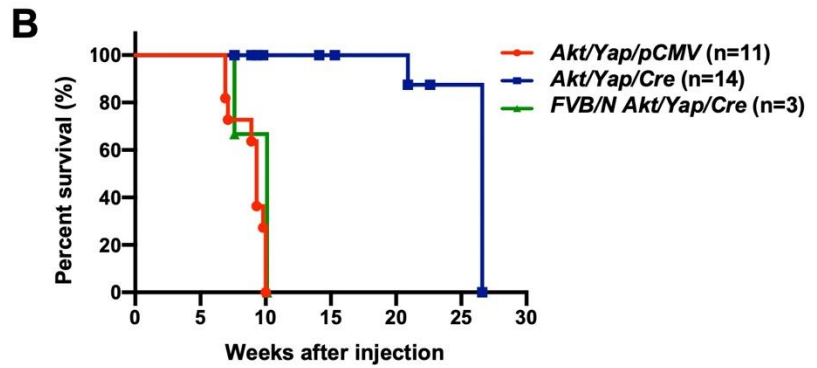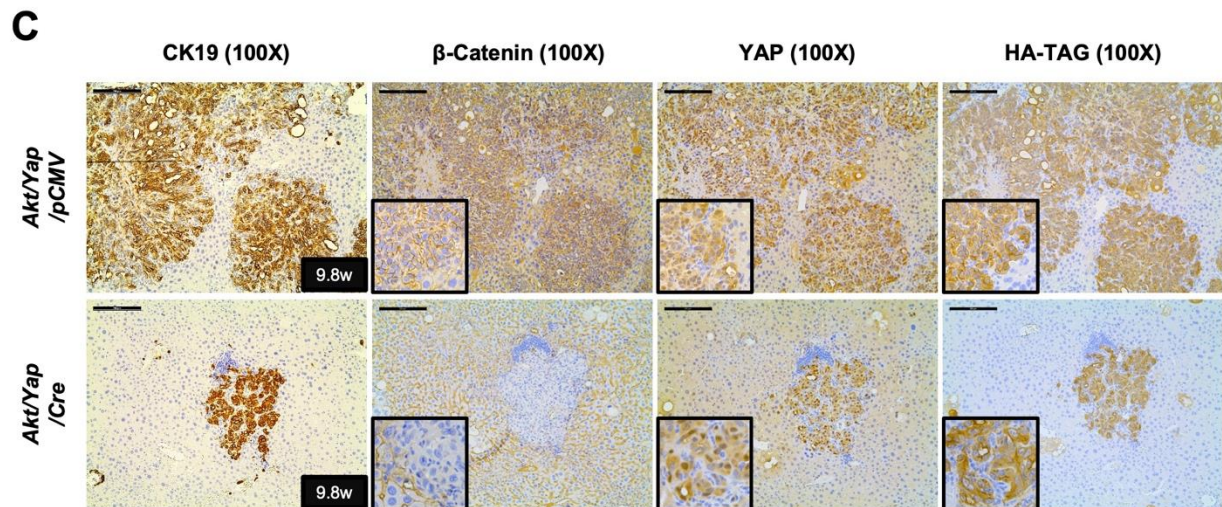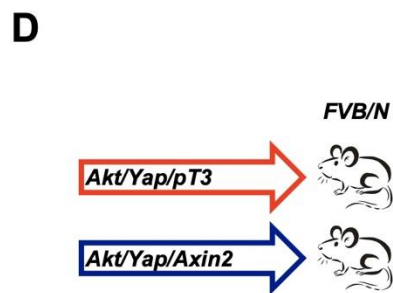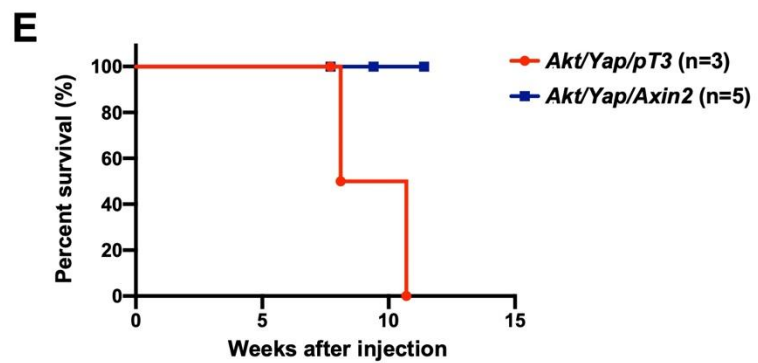

**Supplementary Figure 27. Deletion or suppression of  $\beta$ -catenin inhibits liver tumor development.**

(A) Liver weight of *Ctnnb1<sup>flox/flox</sup> Akt/Yap/pCMV* and *Akt/Yap/Cre* mice. Statistical significance: \*\*\*\* $P < .0001$ . (B) *FVB/N* mice were co-injected with *Akt/Yap/Cre* (n=3) plasmids. Mouse survival curves. (C) Immunohistochemical staining of CK19,  $\beta$ -Catenin, YAP, and HA-TAG in *Ctnnb1<sup>flox/flox</sup> Akt/Yap/pCMV* (M9.8w.p.i) and *Akt/Yap/Cre* (M9.8w.p.i) iCCA lesions. (D) Study design. *FVB/N* mice were subjected to HTVi of either *Akt/Yap/pT3* (n=3) or *Akt/Yap/Axin2* (n=5) plasmids. (E) Survival curves of *Akt/Yap/pT3* and *Akt/Yap/Axin2* mice. Scale bar: 100  $\mu$ m (100x). Abbreviations: M, male; F, female; w.p.i, weeks post-injection.

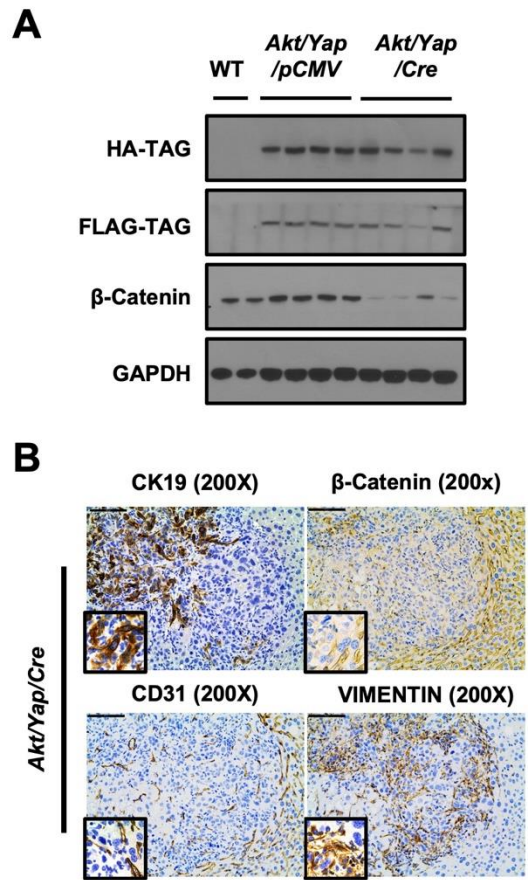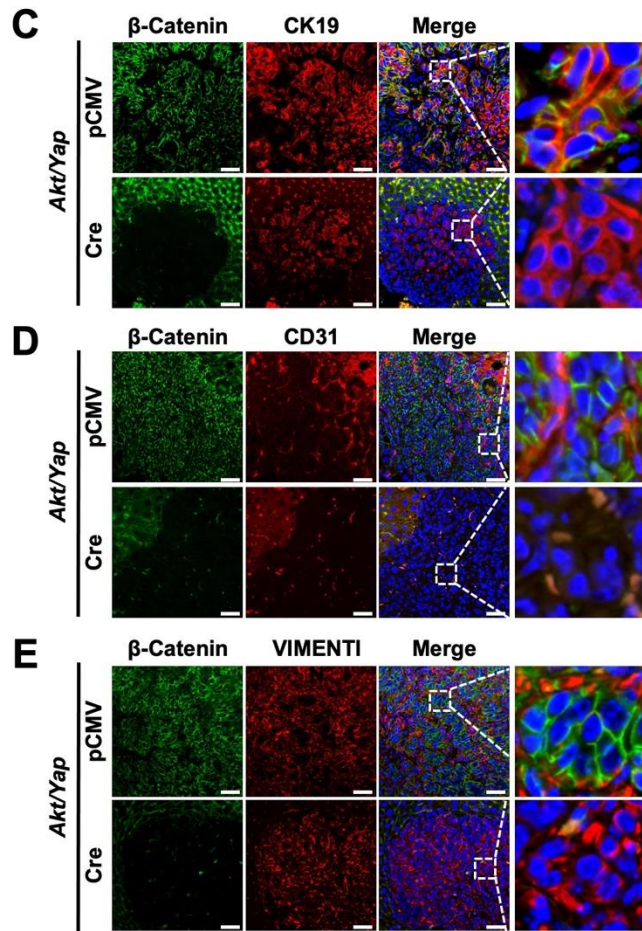



**Supplementary Figure 28. Sporadic  $\beta$ -Catenin positive cells within the *Akt/Yap/Cre* lesions are confirmed as fibroblasts or endothelial cells.**

(A) Western blotting analysis of tagged oncogenes and  $\beta$ -Catenin in *Ctnnb1<sup>flox/flox</sup> Akt/Yap/pCMV* and *Ctnnb1<sup>flox/flox</sup> Akt/Yap/Cre* lesions. (B) Immunohistochemical staining of CK19,  $\beta$ -Catenin, CD31, and VIMENTIN in iCCA lesions from *Ctnnb1<sup>flox/flox</sup> Akt/Yap/Cre* mice. (C-E) Double immunofluorescence staining for  $\beta$ -Catenin (Green), (C) CK19 (Red), (D) CD31 (Red), or (E) VIMENTIN (Red) with DAPI (Blue), and merged images in *Ctnnb1<sup>flox/flox</sup> Akt/Yap/Cre* iCCA lesions. Scale bar: 100  $\mu$ m (200X).

**A***Yap*<sup>flx/flx</sup>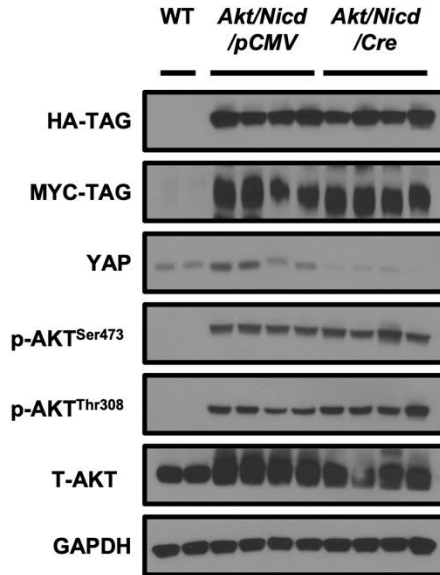**B***Ctnnb1*<sup>flx/flx</sup>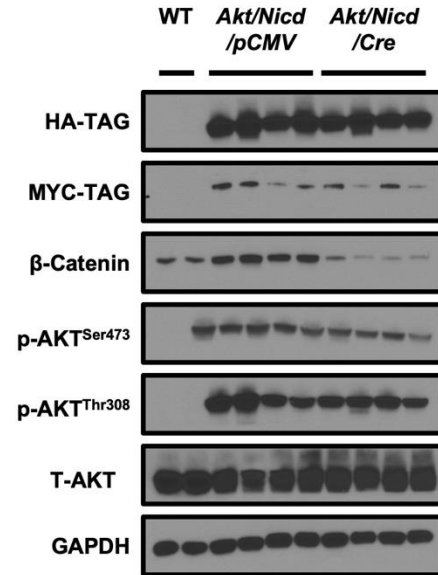

**Supplementary Figure 29. Western blot analysis confirms the deletion of YAP or  $\beta$ -Catenin in *Yap*<sup>flox/flox</sup> or *Ctnnb1*<sup>flox/flox</sup> iCCA lesions.**

(A) Western blotting analysis of YAP, fusion tags, total and phosphorylated AKT expression in *Yap*<sup>flox/flox</sup> *Akt/Nicd/pCMV* and *Yap*<sup>flox/flox</sup> *Akt/Nicd/Cre* iCCA lesions. GAPDH was used as a loading control. (B) Western blot analysis of  $\beta$ -Catenin, fusion tags, total and phosphorylated AKT expression in *Ctnnb1*<sup>flox/flox</sup> *Akt/Nicd/pCMV* and *Ctnnb1*<sup>flox/flox</sup> *Akt/Nicd/Cre* iCCA lesions. GAPDH was used as a loading control.

**A**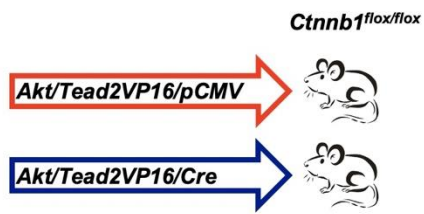**B**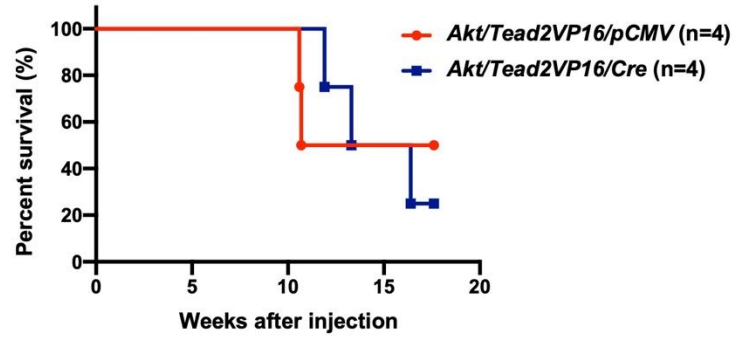**C**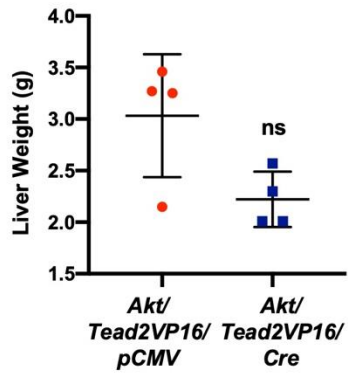**D**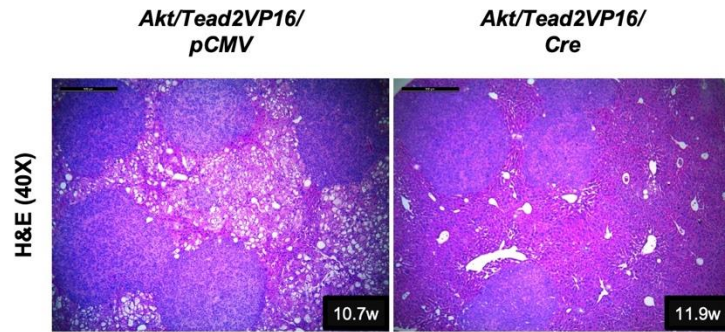

**Supplementary Figure 30. Deletion of  $\beta$ -catenin mildly delays *Akt/Tead2VP16* iCCA liver tumor development.**

(A) Study design. *Ctnnb1<sup>flox/flox</sup>* mice were subjected to HTVi of either *Akt/Tead2VP16/pCMV* (n=4) or *Akt/Tead2VP16/Cre* (n=4) plasmids. (B) Survival curves showing the similar survival is observed in the indicated mice. (C) Liver weight of *Ctnnb1<sup>flox/flox</sup> Akt/Tead2VP16/pCMV* and *Akt/Tead2VP16/Cre* mice. Statistical significance: ns, not significant. (D) H&E of liver sections from *Ctnnb1<sup>flox/flox</sup> Akt/Tead2VP16/pCMV* (M10.7w.p.i) and *Ctnnb1<sup>flox/flox</sup> Akt/Tead2VP16/Cre* (F11.9w.p.i) mice revealing the tumor lesions are iCCA. Scale bar: 500  $\mu$ m (40x). Abbreviations: H&E, hematoxylin and eosin staining; w.p.i, weeks post-injection.

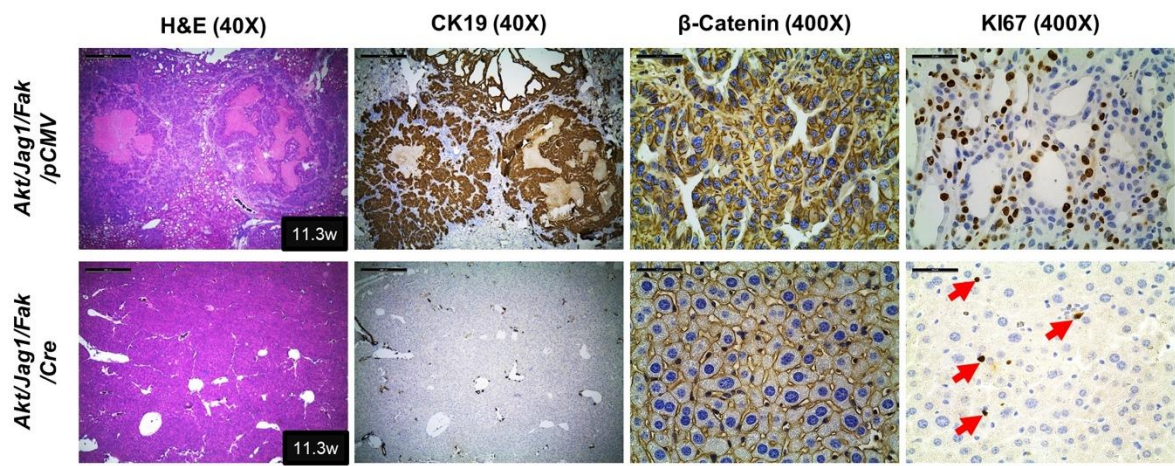

**Supplementary Figure 31. Comparison of *Akt/Jag1/Fak* induced liver tumorigenesis in wildtype and *Ctnnb1* conditional knockout mice.**

H&E and immunochemical staining of CK19,  $\beta$ -Catenin and KI67 in liver sections from *Ctnnb1*<sup>flox/flox</sup> *Akt/Jag1/Fak/pCMV* (F11.3w.p.i), and *Ctnnb1*<sup>flox/flox</sup> *Akt/Jag1/Fak/Cre* (F11.3w.p.i) mice. Scale bar: 500  $\mu$ m (40x) and 50  $\mu$ m (400x). Abbreviations: F, female; H&E: Hematoxylin and eosin; w.p.i, weeks post-injection.

**A**

| Database | Group         | N Matching Down Genes | UP in CCA   | DOWN in CCA | P Value (UP vs DOWN) |
|----------|---------------|-----------------------|-------------|-------------|----------------------|
| NCI      | siYZ vs siCon | 2316                  | 726 (31.4%) | 353 (15.2%) | $P < .05$            |
| TCGA     | siYZ vs siCon | 2352                  | 720 (30.6%) | 325 (13.8%) | $P < .05$            |

**B**

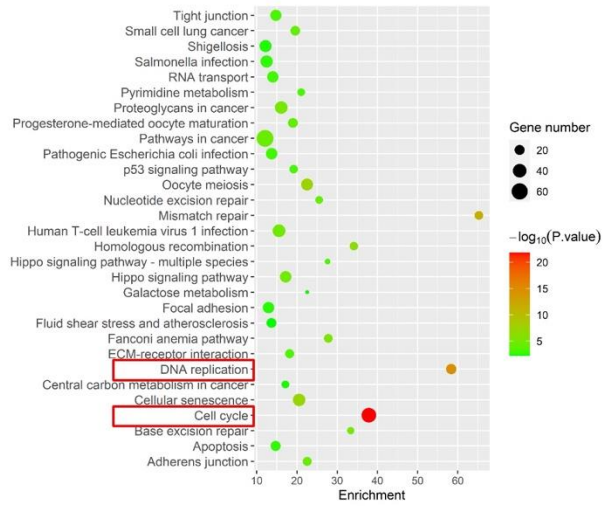

siYZ (DOWN) UP in NCI

**C**

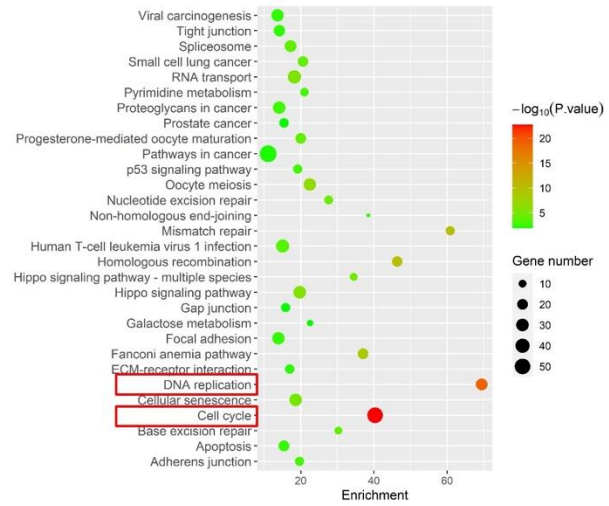

siYZ (DOWN) UP in TCGA



**Supplementary Figure 32. A set of downregulated genes in siYT intrahepatic cholangiocarcinoma (iCCA) cell lines is upregulated in human iCCA specimens.**

(A) Downregulated genes identified in siYT iCCA cells were matched with the National Cancer Institute (NCI) and The Cancer Genome Atlas (TCGA) CHOL datasets. Table showing the expression patterns of these downregulated genes by YAP/TAZ knockdown in human CCA specimens. (B, C) KEGG analysis of genes downregulated by siYT and upregulated in human iCCAs based on (B) the National Cancer Institute (NCI) or (C) The Cancer Genome Atlas (TCGA) CHOL dataset. Upregulated genes (down in siYT) in human iCCA specimens are associated with DNA replication, and cell cycle pathway. Genes were ranked by *P*-value.

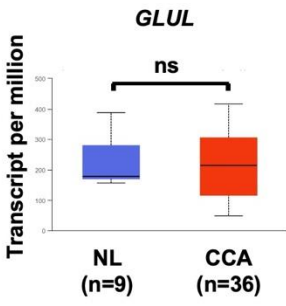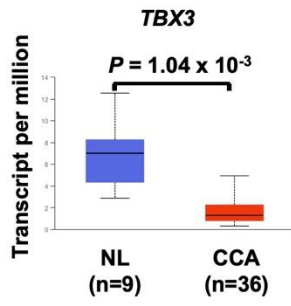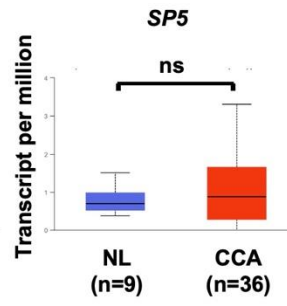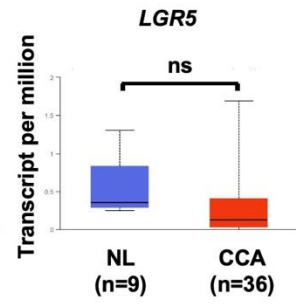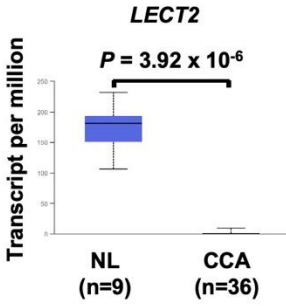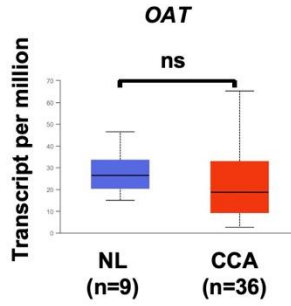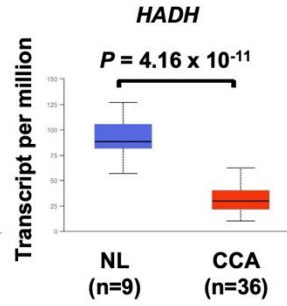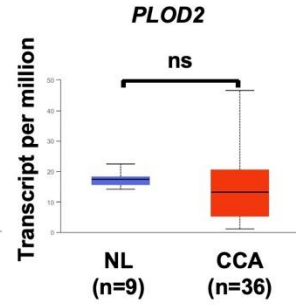

**Supplementary Figure 33. The canonical Wnt signaling is not activated in human iCCA specimens.**

Expression of canonical Wnt targets, including *GLUL*, *TBX3*, *SP5*, *LGR5*, *LECT2*, *OAT*, *HADH*, and *PLOD2* in iCCA specimens and surrounding non-tumorous livers based on The Cancer Genome Atlas (TCGA) CHOL database. Pictures were downloaded from UALCAN. Abbreviations: NL, non-tumorous surrounding liver; CCA: cholangiocarcinoma; ns: not significant.

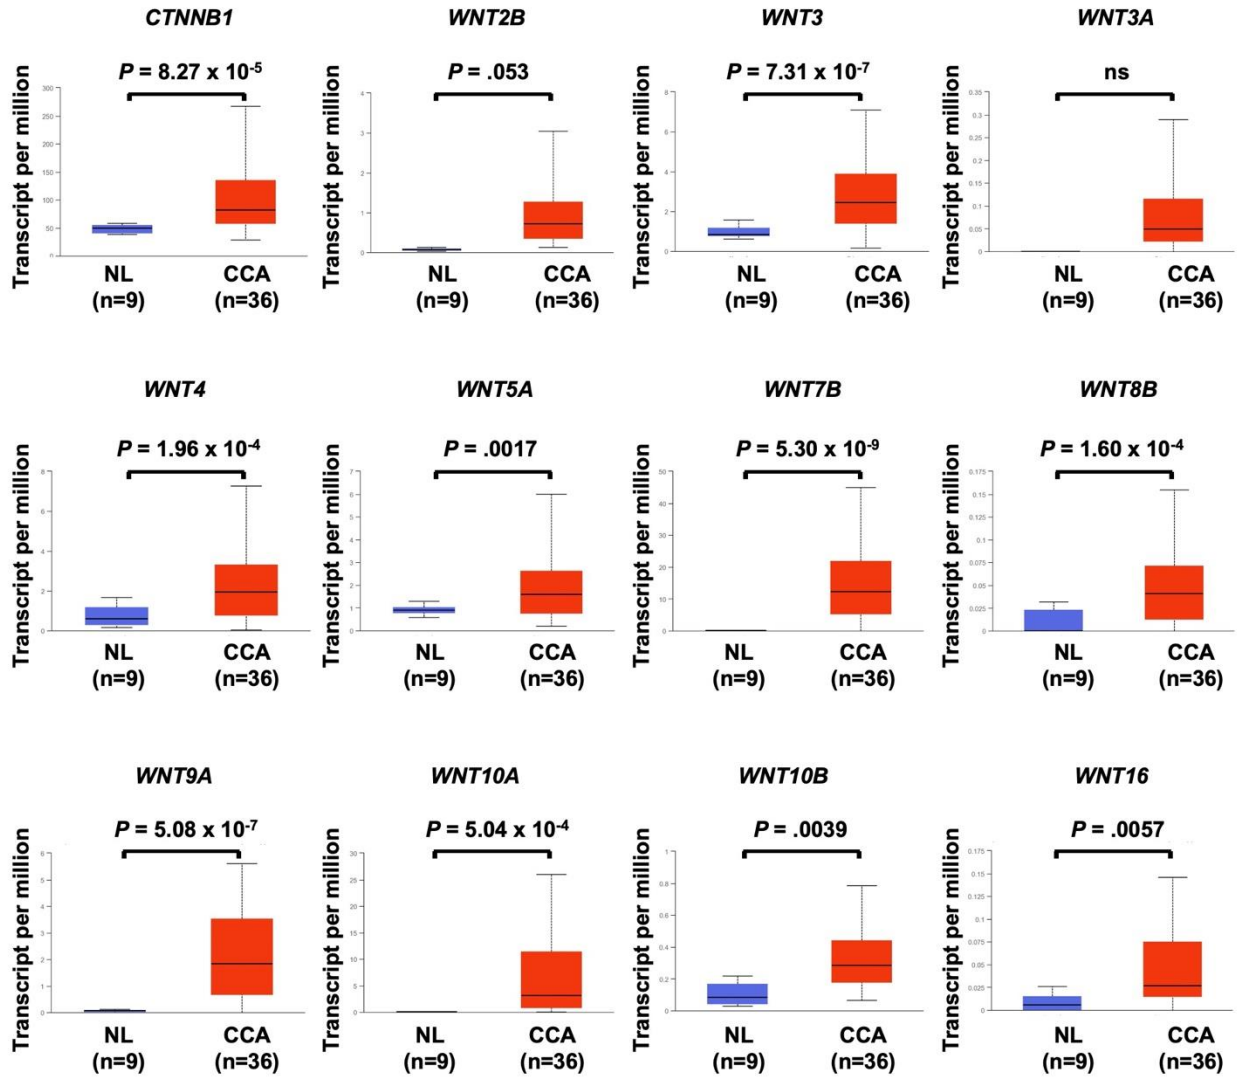

**Supplementary Figure 34. *CTNNB1* and multiple WNT ligand encoding genes are increased in human intrahepatic cholangiocarcinoma (iCCA) specimens.**

Expression levels of *CTNNB1*, *WNT2B*, *WNT3*, *WNT3A*, *WNT4*, *WNT5A*, *WNT7B*, *WNT8B*, *WNT9A*, *WNT10A*, *WNT10B*, and *WNT16* genes in iCCA specimens and surrounding non-tumorous livers based on TCGA CHOL database. Pictures were downloaded from UALCAN. Abbreviations: NL, non-tumorous surrounding liver; CCA: cholangiocarcinoma; ns: not significant.

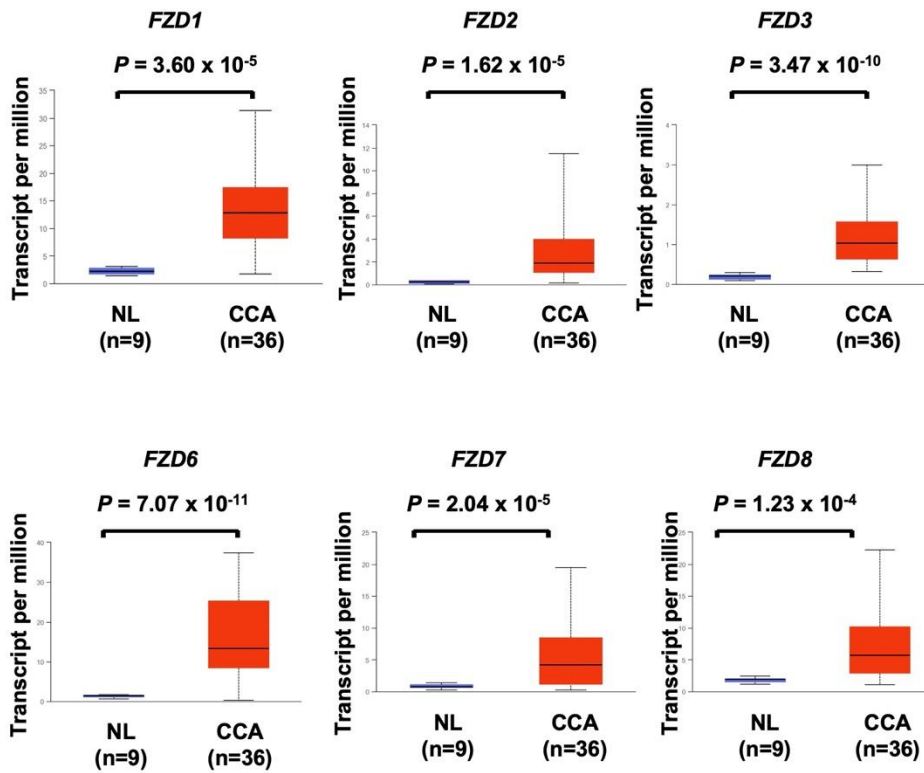

**Supplementary Figure 35. Multiple frizzled (FZD) receptor encoding genes are increased in human intrahepatic cholangiocarcinoma (iCCA) specimens.**

Expression levels of *FZD1*, *FZD2*, *FZD3*, *FZD6*, *FZD7*, and *FZD8* in human iCCA specimens and surrounding non-tumorous livers based on TCGA CHOL database. Pictures were downloaded from UALCAN. Abbreviations: NL, non-tumorous surrounding liver; CCA: cholangiocarcinoma; ns: not significant.

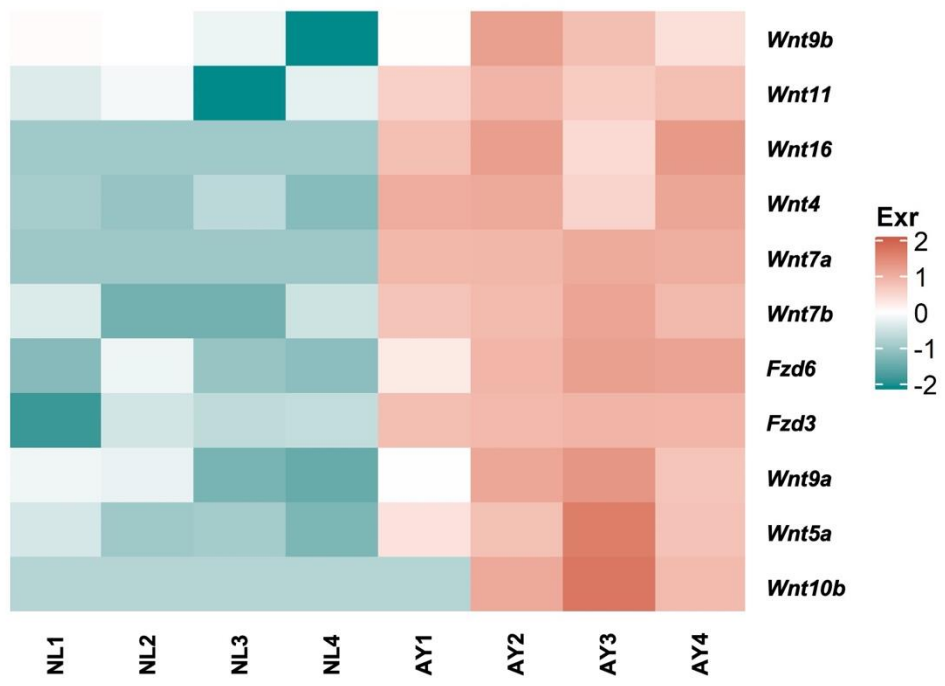



**Supplementary Figure 36. Heatmap of the expression of WNT ligands and FZD receptors in normal livers and *Akt/Yap* tumor tissues.**

Red, up-regulated; green, down-regulated. Abbreviations: NL, normal liver; AY, *Akt/Yap* iCCA.

**A**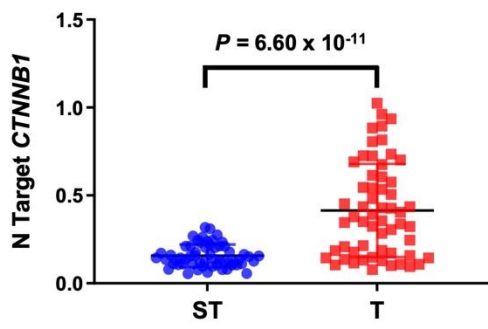**B**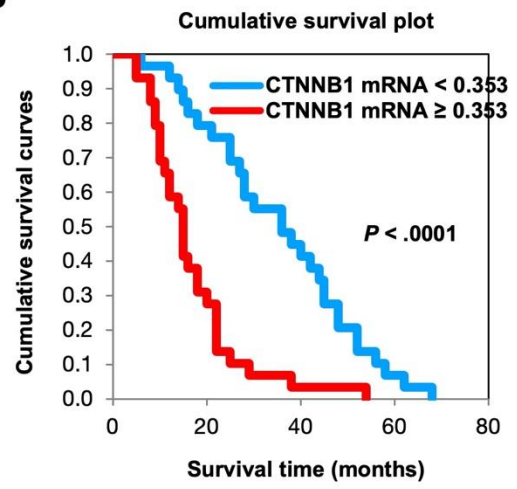

**Supplementary Figure 37. *CTNNB1* is overexpressed in human intrahepatic cholangiocarcinoma (iCCA) specimens and associated with a poor prognosis.**

(A) Quantitative real-time RT-PCR analysis of *CTNNB1* mRNA levels in iCCA (T; n = 58) and corresponding non-tumorous surrounding liver tissues (ST; n = 58). Quantitative values were calculated using the PE Biosystems Analysis software and expressed as number target (N Target).  $N\ Target = 2^{-\Delta Ct}$ , wherein the  $\Delta Ct$  value of each sample was calculated by subtracting the average Ct value of the gene of interest from the average Ct value of the *GAPDH* gene. (B) Kaplan–Meier survival curves of human iCCA specimens with high and low *CTNNB1* mRNA expression, indicating the poor prognosis of patients with elevated *CTNNB1* levels.

**A**

| Database | Group           | N Matching Down Genes | UP in CCA   | DOWN in CCA | P Value (UP vs DOWN) |
|----------|-----------------|-----------------------|-------------|-------------|----------------------|
| NCI      | shβCat vs shCon | 3049                  | 876 (28.7%) | 395 (13.0%) | $P < .05$            |
| TCGA     | shβCat vs shCon | 3060                  | 689 (22.5%) | 331 (10.8%) | $P < .05$            |

**B**

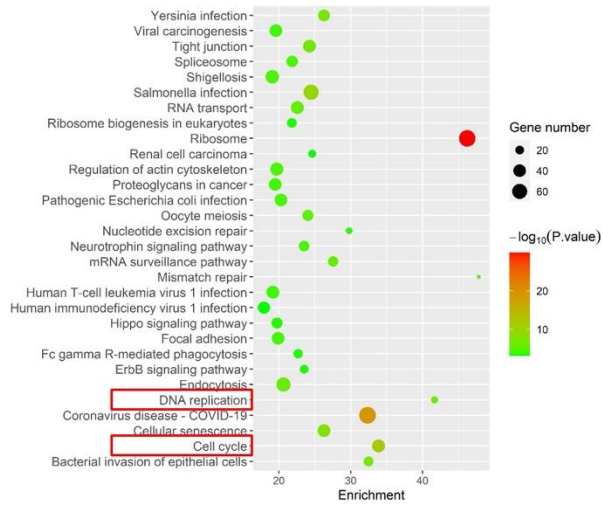

**shβCat (DOWN) UP in NCI**

**C**

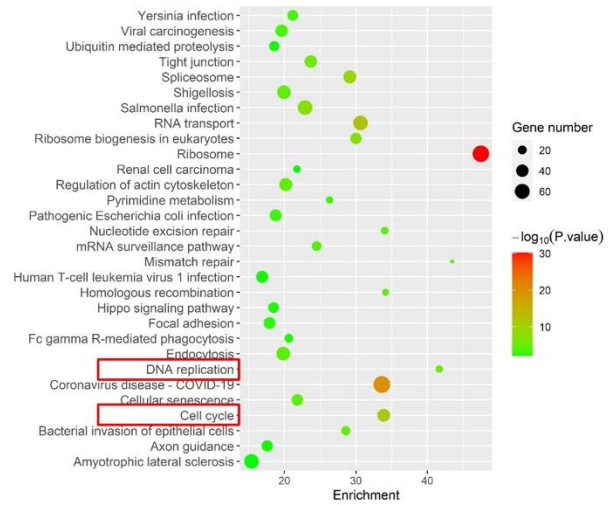

**shβCat (DOWN) UP in TCGA**

**Supplementary Figure 38. A set of downregulated genes in sh $\beta$ Cat iCCA cells are upregulated in human intrahepatic cholangiocarcinoma (iCCA) specimens.**

(A) Downregulated genes identified in sh $\beta$ Catenin (sh $\beta$ Cat) iCCA cells were matched with the National Cancer Institute (NCI) and The Cancer Genome Atlas (TCGA) CHOL datasets. Table showing the expression patterns of these downregulated genes by  $\beta$ -Catenin knockdown in human CCA specimens. (B, C) KEGG analysis of genes downregulated by sh $\beta$ Cat and upregulated in human iCCAs based on (B) the National Cancer Institute (NCI) or (C) The Cancer Genome Atlas (TCGA) CHOL dataset. Upregulated genes (down in sh $\beta$ Cat) in human iCCA specimens are associated with DNA replication, and cell cycle pathway. Genes were ranked by *P*-value.

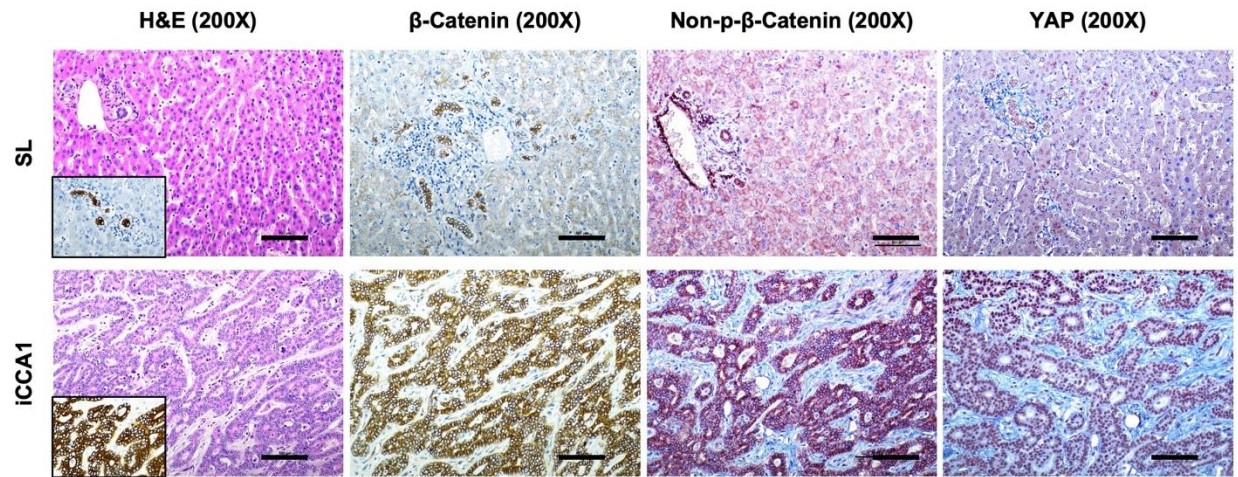

**Supplementary Figure 39. Representative immunohistochemical analysis showing  $\beta$ -catenin staining patterns in the human surrounding non-tumorous liver and intrahepatic cholangiocarcinoma.**

H&E and immunohistochemical staining for  $\beta$ -catenin, activated/non-phosphorylated  $\beta$ -catenin (Non-p- $\beta$ -Catenin), and YAP in normal liver (upper panels), and iCCA (lower panels). CK19 was used as a biliary marker (insets). Scale bar: 100 $\mu$ m (200x). Abbreviations: SL, surrounding non-tumorous liver; iCCA, intrahepatic cholangiocarcinoma; H&E, hematoxylin and eosin staining.

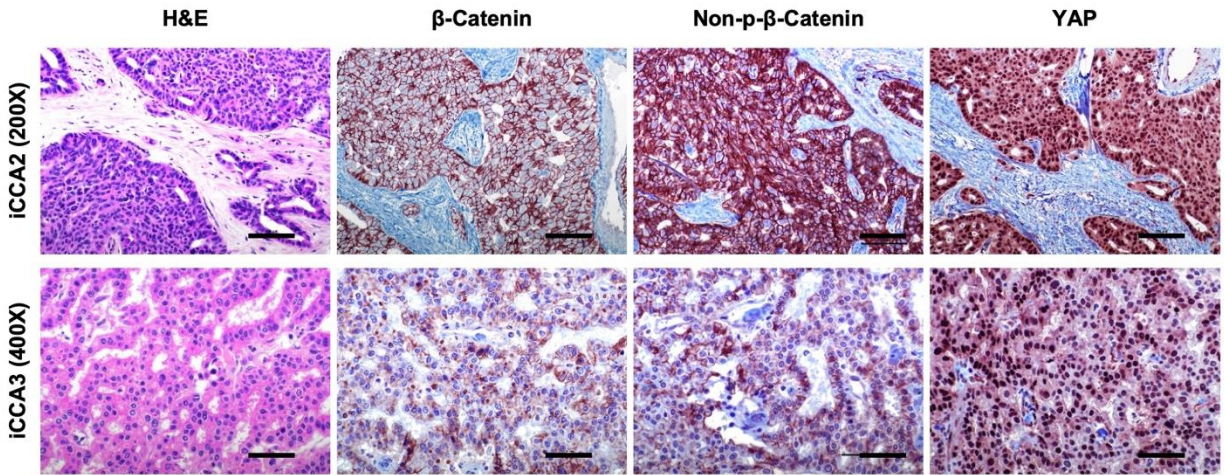



**Supplementary Figure 40. Representative immunohistochemical analysis showing  $\beta$ -Catenin staining patterns in human intrahepatic cholangiocarcinoma (iCCA) specimens.**

H&E and immunohistochemical staining for  $\beta$ -Catenin, activated/non-phosphorylated  $\beta$ -Catenin (Non-p- $\beta$ -Catenin), and YAP in human iCCA specimens (upper panels, iCCA2; lower panels, iCCA3). Scale bar: 100 $\mu$ m (200), 50  $\mu$ m (400x). Abbreviations: SL, surrounding non-tumorous liver; iCCA, intrahepatic cholangiocarcinoma; H&E, hematoxylin and eosin staining.

**A**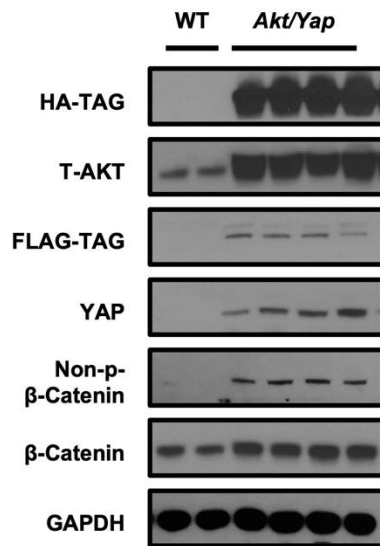**B**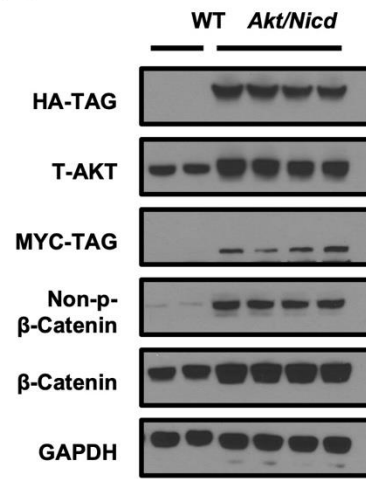**C**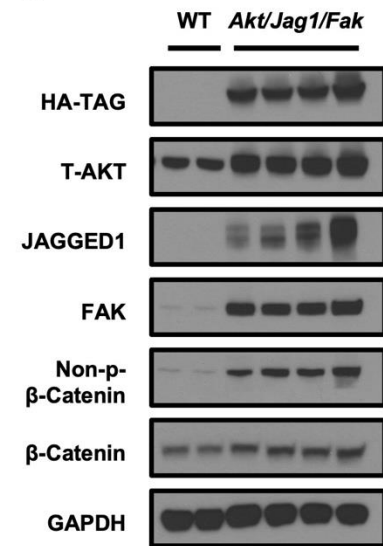

**Supplementary Figure 41. Activated/non-phosphorylated  $\beta$ -Catenin (Non-p- $\beta$ -Catenin) is overexpressed in *Akt/Yap*, *Akt/Nicd* and *Akt/Jag1/Fak* intrahepatic cholangiocarcinoma (iCCA) lesions.**

(A-C) Western blotting analysis of  $\beta$ -Catenin and Non-p- $\beta$ -Catenin<sup>S33/S37/T41</sup> levels in livers from *FVB/N* wildtype mice (WT) or *FVB/N* mice injected with (A) Akt and Yap plasmids (*Akt/Yap*), or (B) Akt and Nicd plasmids (*Akt/Nicd*), or (C) Akt, Jag1, and Fak plasmids (*Akt/Jag1/Fak*). GAPDH was used as a loading control.

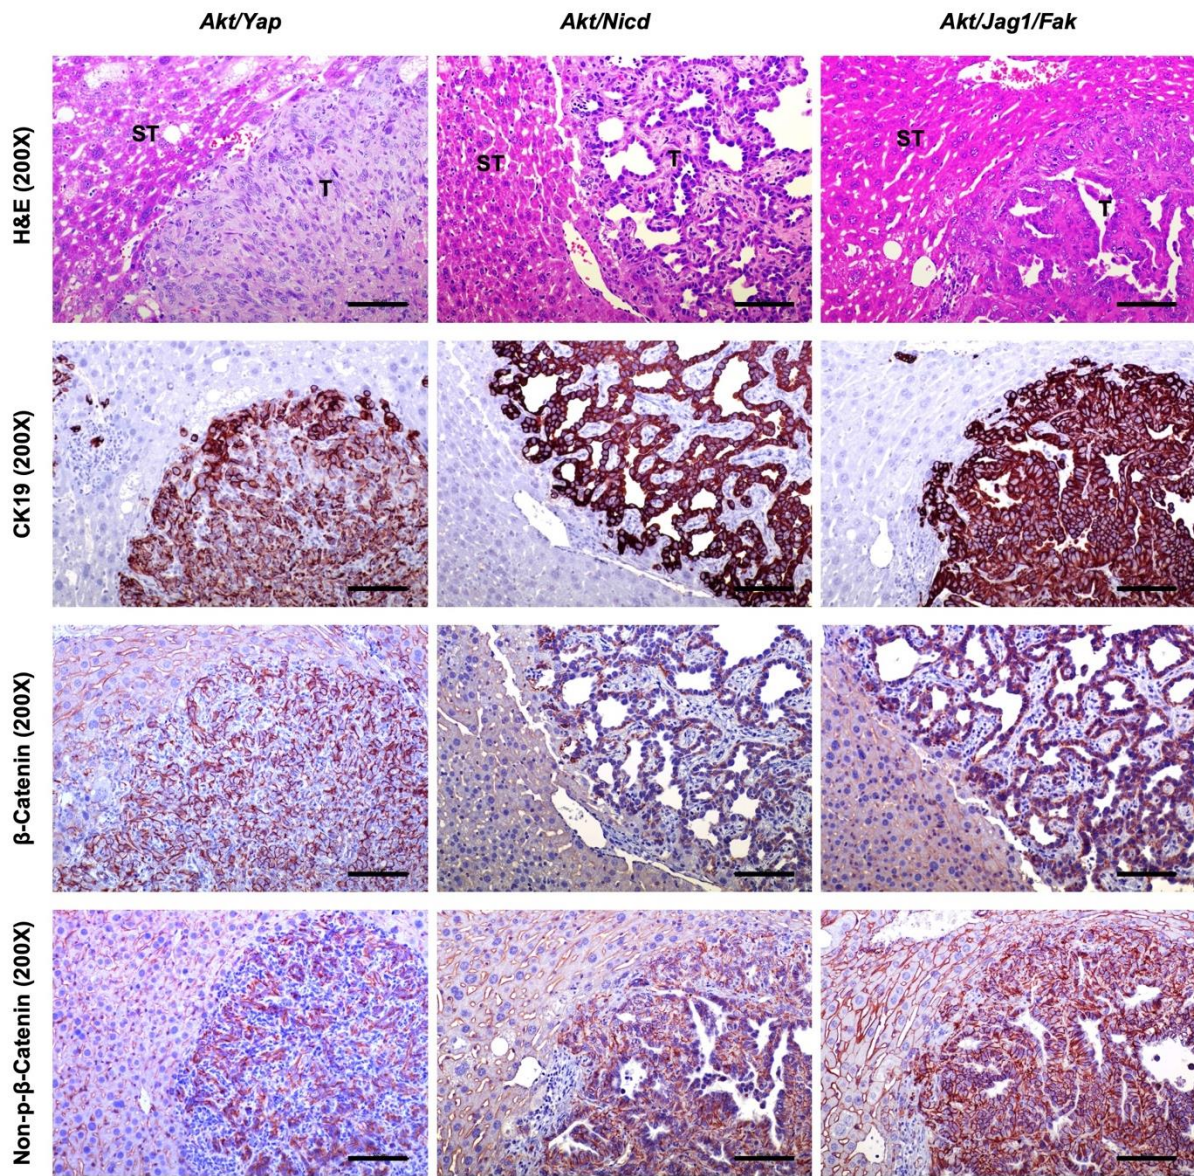

**Supplementary Figure 42. Activated/non-phosphorylated  $\beta$ -Catenin (Non-p- $\beta$ -Catenin) is overexpressed in *Akt/Yap*, *Akt/Nicd*, and *Akt/Jag1/Fak* intrahepatic cholangiocarcinoma (iCCA) lesions.**

(A-C) Immunohistochemical patterns of  $\beta$ -Catenin and Non-p- $\beta$ -Catenin<sup>S33/S37/T41</sup> proteins in livers from *FVB/N* mice injected with Akt and Yap plasmids (*Akt/Yap*), Akt and Nicd plasmids (*Akt/Nicd*), and Akt, Jag1, and Fak plasmids (*Akt/Jag1/Fak*). Note the more pronounced immunoreactivity (both membranous and cytoplasmic) for  $\beta$ -Catenin and Non-p- $\beta$ -Catenin<sup>S33/S37/T41</sup> in the tumor lesions (T) of the three mouse models compared with non-tumorous surrounding livers (ST). CK19 staining was used as a biliary cell marker. Original magnification: 200X; scale bar: 100  $\mu$ m.

**A**

|               | <u>baseMean</u> | <u>log2FoldChange YAP/AKT<br/>CAF vs qHSC</u> | <u>lfcSE</u> | <u>stat</u> | <u>pvalue</u> | <u>padj</u> |
|---------------|-----------------|-----------------------------------------------|--------------|-------------|---------------|-------------|
| <i>Wnt11</i>  | 1255.37194      | 11.5655197                                    | 0.84607353   | -13.669639  | 1.54E-42      | 2.95E-40    |
| <i>Wnt16</i>  | 123.40583       | 8.028901453                                   | 0.72455193   | -11.081195  | 1.55E-28      | 1.34E-26    |
| <i>Wnt7b</i>  | 10.2228005      | 6.902691416                                   | 1.33819407   | -5.158214   | 2.49E-07      | 2.53E-06    |
| <i>Wnt7a</i>  | 7.0326439       | 6.360778976                                   | 1.39377143   | -4.5637174  | 5.03E-06      | 4.02E-05    |
| <i>Wnt10b</i> | 3.31656617      | 5.273611083                                   | 1.40741939   | -3.7470075  | 0.00017896    | 0.00101488  |
| <i>Wnt9a</i>  | 226.348575      | 4.19220183                                    | 0.42320306   | -9.9058872  | 3.92E-23      | 2.39E-21    |
| <i>Wnt9b</i>  | 31.1346418      | 3.70734194                                    | 1.21065463   | -3.0622622  | 0.00219671    | 0.00948937  |
| <i>Wnt5b</i>  | 34.8673085      | 3.61557097                                    | 0.68160118   | -5.3045257  | 1.13E-07      | 1.23E-06    |
| <i>Wnt5a</i>  | 1219.08529      | 3.507423969                                   | 0.24158791   | -14.51821   | 9.29E-48      | 2.33E-45    |
| <i>Wnt2b</i>  | 20.5134084      | 3.359148514                                   | 0.69873826   | -4.8074489  | 1.53E-06      | 1.35E-05    |
| <i>Wnt10a</i> | 0.77393808      | 3.038648727                                   | 2.17336442   | -1.3981313  | 0.16207366    | 0.35519516  |
| <i>Wnt8a</i>  | 0.53140672      | 2.641312747                                   | 3.46070471   | -0.7632297  | 0.4453264     | 0.72358081  |
| <i>Wnt1</i>   | 0.50657358      | 1.529336339                                   | 2.97291684   | -0.5144228  | 0.60695639    | 0.86790987  |
| <i>Wnt6</i>   | 4.61799697      | 1.11415206                                    | 1.28126947   | -0.8695689  | 0.38453605    | 0.65734614  |
| <i>Wnt3</i>   | 0.11605632      | 0.937908835                                   | 3.53381154   | -0.26541    | 0.79069365    | 0.91726515  |

**B**

|               | <u>baseMean</u> | <u>log2FoldChange KRAS/SGP19<br/>CAF vs qHSC</u> | <u>lfcSE</u> | <u>stat</u> | <u>pvalue</u> | <u>padj</u> |
|---------------|-----------------|--------------------------------------------------|--------------|-------------|---------------|-------------|
| <i>Wnt11</i>  | 332.86546       | 9.655498443                                      | 0.76909008   | -12.554444  | 3.76E-36      | 3.19E-34    |
| <i>Wnt16</i>  | 7.3843069       | 3.827581524                                      | 0.984075     | -3.8895222  | 0.00010044    | 0.00059503  |
| <i>Wnt7b</i>  | 6.8194447       | 6.40611918                                       | 1.3956808    | -4.5899601  | 4.43E-06      | 3.45E-05    |
| <i>Wnt7a</i>  | 2.4436066       | 4.911960842                                      | 2.00442261   | -2.4505615  | 0.01426336    | 0.04778511  |
| <i>Wnt10b</i> | 4.3690572       | 5.756012297                                      | 1.52469702   | -3.7751843  | 0.00015989    | 0.00090605  |
| <i>Wnt9a</i>  | 151.3534        | 3.605364965                                      | 0.33047355   | -10.909693  | 1.04E-27      | 5.70E-26    |
| <i>Wnt9b</i>  | 7.0807807       | 1.041449368                                      | 1.07947646   | -0.9647726  | 0.3346587     | 0.5793428   |
| <i>Wnt5b</i>  | 19.143788       | 2.698929369                                      | 0.75625741   | -3.5687973  | 0.00035862    | 0.00187471  |
| <i>Wnt5a</i>  | 820.98723       | 2.967380474                                      | 0.26840935   | -11.055429  | 2.06E-28      | 1.17E-26    |
| <i>Wnt2b</i>  | 39.955441       | 4.439373336                                      | 0.56657154   | -7.8355036  | 4.67E-15      | 1.05E-13    |
| <i>Wnt10a</i> | 0.8193738       | 3.349338817                                      | 3.27160809   | -1.0237592  | 0.30594903    | 0.54546471  |
| <i>Wnt8a</i>  | 0.2304375       | 1.600543899                                      | 3.781982     | -0.4232024  | 0.67214759    | 0.86846141  |
| <i>Wnt1</i>   | 1.8665591       | 3.69873716                                       | 1.80910113   | -2.0445165  | 0.04090255    | 0.11392151  |
| <i>Wnt6</i>   | 7.1727169       | 1.753371848                                      | 1.18084564   | -1.4848442  | 0.13758509    | 0.30084481  |
| <i>Wnt3</i>   | 0.1199346       | 0.86756188                                       | 3.81693853   | -0.2272926  | 0.82019623    | 0.90144855  |

**Supplementary Figure 43. Multiple WNT ligand encoding genes are increased in cancer-associated fibroblasts.**

(A-B) Fold regulation of Wnts mRNA in cancer-associated fibroblasts (CAF) from (A) *Akt/Yap* and (B) *Kras/sgp19* iCCA models compared with quiescent hepatic stellate cells (qHSC).

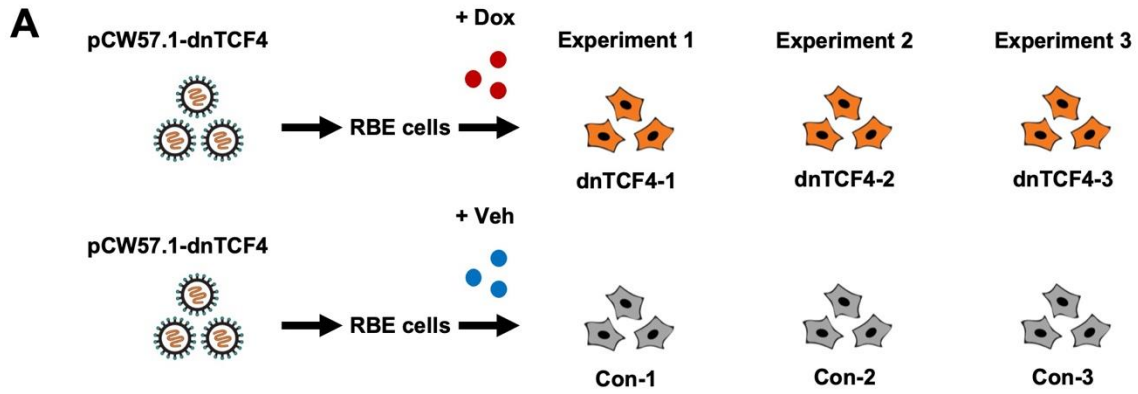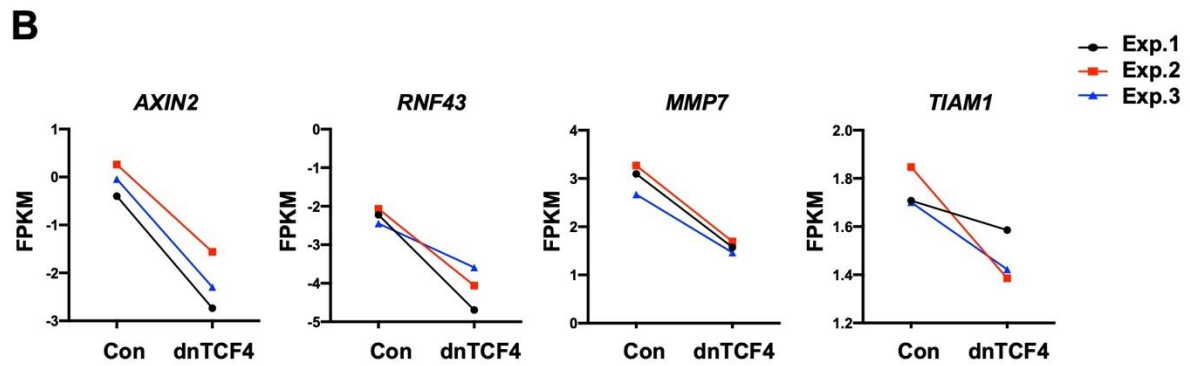

**C**

| Group         | N Genes | Direction | FC   | P Value   |
|---------------|---------|-----------|------|-----------|
| dnTCF4 vs Con | 167     | Down      | >1.3 | $P < .05$ |
| dnTCF4 vs Con | 143     | Up        | >1.3 | $P < .05$ |



**Supplementary Figure 44. RNA sequencing in dnTCF4 overexpressed iCCA cell lines.**

(A) Study design of RNA sequencing. Human RBE cells were transfected with doxycycline-inducible pCW57.1-dnTCF4 plasmid by lentiviral transduction, followed by incubation for 48 h with 5µg/ml doxycycline (dnTCF4, n=3) or vehicle control (Con, n=3). The obtained cells were prepared for RNA sequencing. (B) Fragments per kilobase of transcript per million mapped reads (FPKM) results of *AXIN2*, *RNF43*, *MMP7*, and *TCF4* expression. (C) Significant downregulated and upregulated genes in dnTCF4 overexpression RBE cells are shown in Table. Abbreviations: Dox, doxycycline; Veh, Vehicle; FC, fold change.

**A**

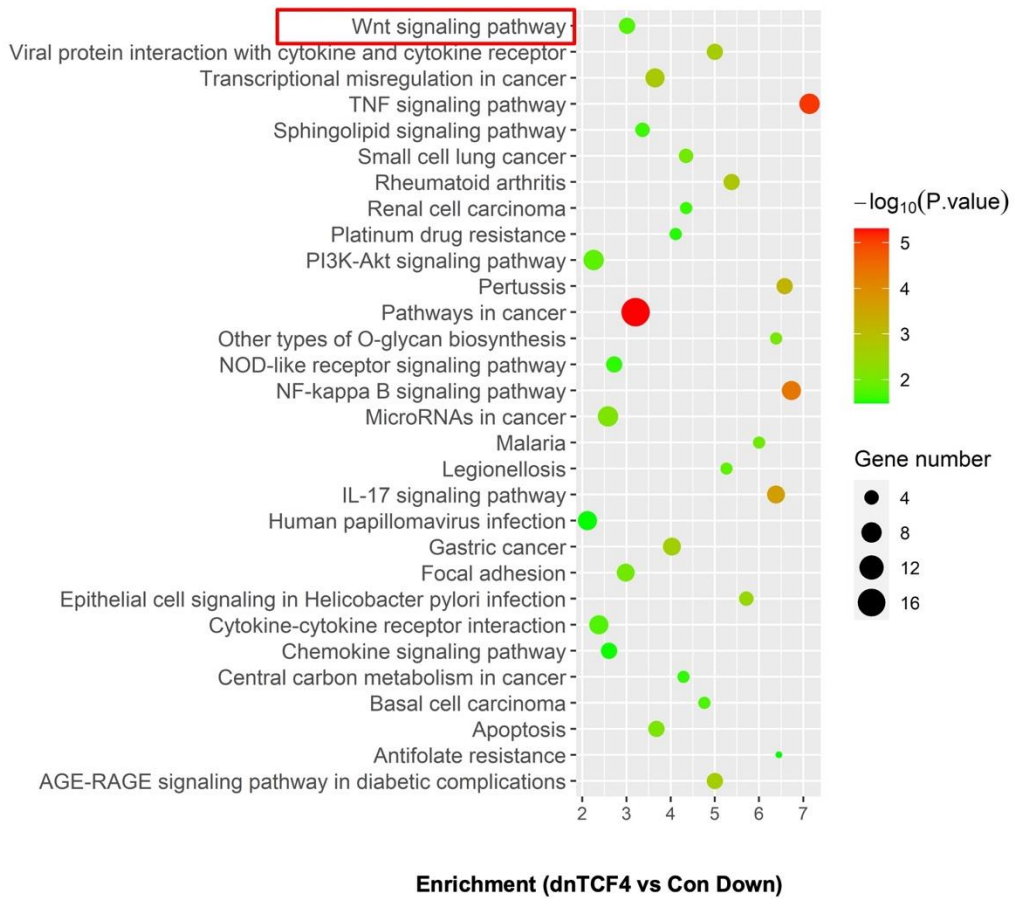

**B**

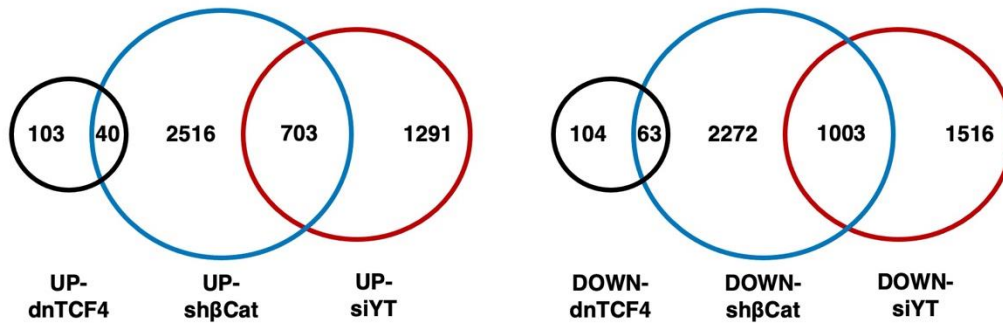

**Supplementary Figure 45. Comparison of the transcriptomes in dnTCF4, sh $\beta$ Cat and siYT RBE cells.**

(A) KEGG analysis of downregulated genes in dnTCF4 overexpressed RBE cells. Blocking  $\beta$ -Catenin/TCF4 interaction in RBE leads to the downregulation of genes enriched in the Wnt signaling pathway (Red inserts). Genes were ranked by *P*-value. (B) Venn diagram showing the overlapping upregulated and downregulated gene number in the dnTCF4 (in black), sh $\beta$ Cat (in blue) and siYT (in red) RBE cell lines.

**A**

| Group     | N Genes | Direction | FC   | P Value   |
|-----------|---------|-----------|------|-----------|
| BAY vs AY | 664     | Down      | >2.0 | $P < .05$ |
| BAY vs AY | 393     | Up        | >2.0 | $P < .05$ |

**B**

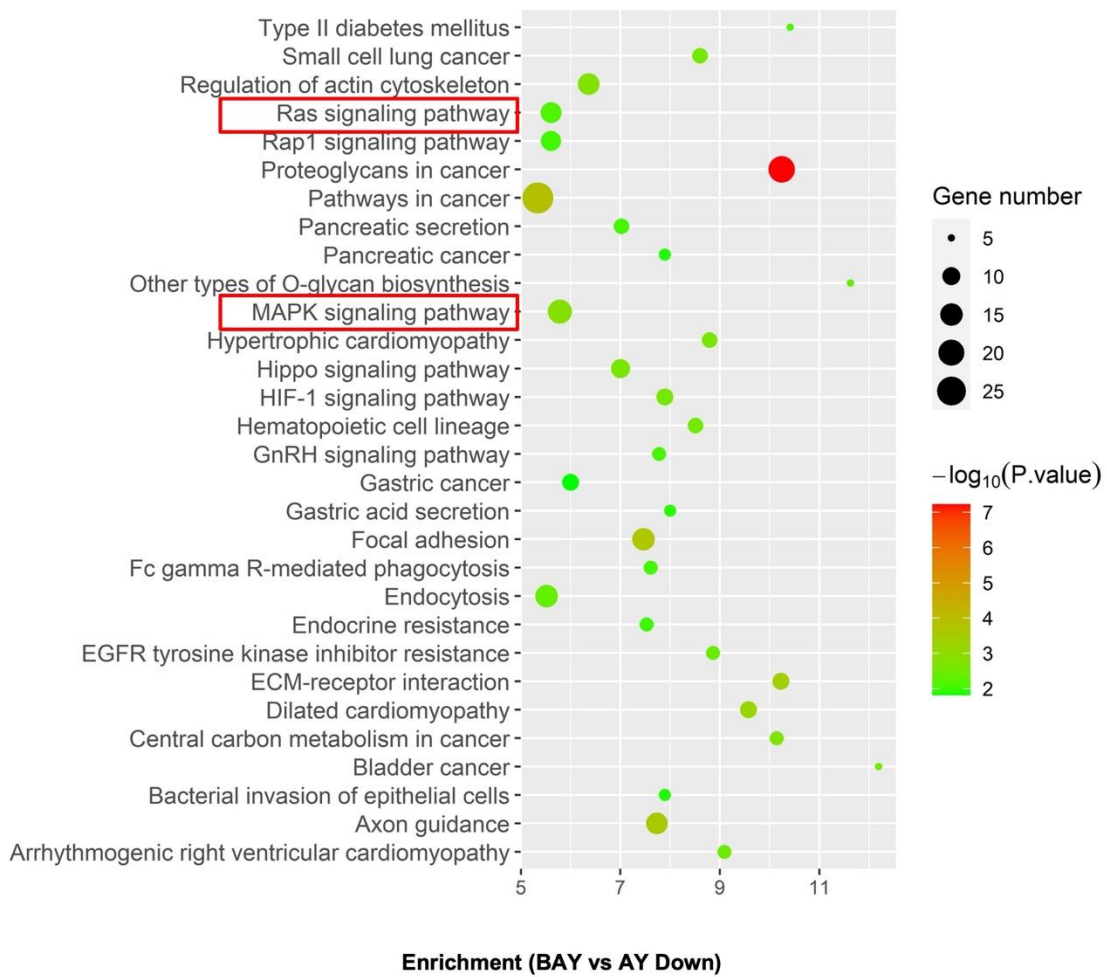

**Supplementary Figure 46. RNA sequencing in *Ctnnb1* deleted *Akt/Yap* and *Akt/Yap* iCCA lesions.**

(A) Significant downregulated and upregulated genes in *Ctnnb1* deleted *Akt/Yap* iCCAs compared with *Akt/Yap* iCCAs were shown in Table. (B) KEGG analysis of downregulated genes in *Ctnnb1* deleted *Akt/Yap* iCCAs. Deletion of *Ctnnb1* in *Akt/Yap* iCCAs leads to downregulation of genes enriched in the Ras signaling pathway and MAPK signaling pathway (Red inserts). Genes were ranked by *P*-value. Abbreviations: BAY, *Ctnnb1*<sup>flox/flox</sup> *Akt/Yap/Cre* iCCA; AY, *Akt/Yap* iCCA; FC, fold change.

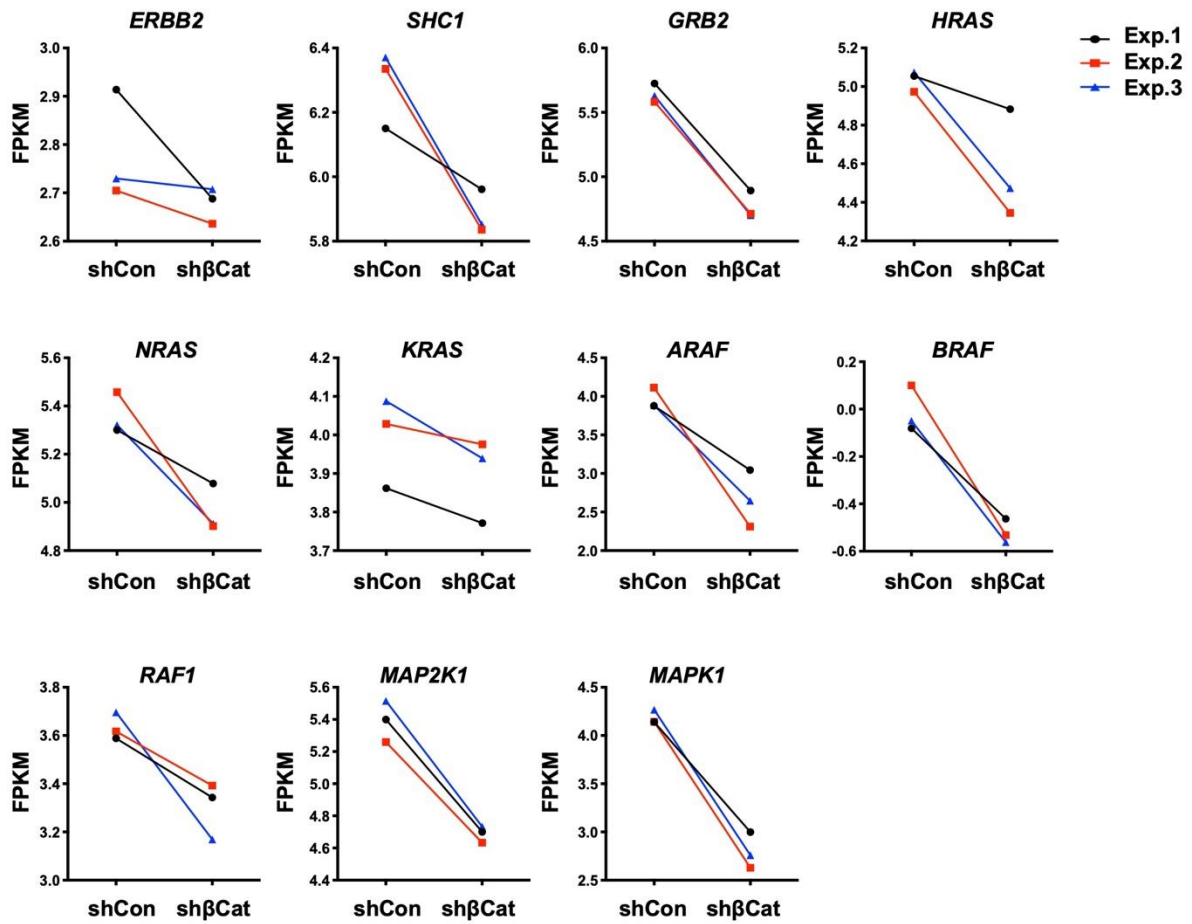

**Supplementary Figure 47. Silencing of  $\beta$ -Catenin in RBE cells leads to the downregulation of genes involved in the Ras/MAPK signaling pathway.**

Fragments per kilobase of transcript per million mapped reads (FPKM) results of *ERBB2*, *SHC1*, *GRB2*, *HRAS*, *NRAS*, *KRAS*, *ARAF*, *BRAF*, *RAF1*, *MAP2K1*, and *MAPK1* expression. RNA sequencing in *Ctnnb1* deleted *Akt/Yap* and *Akt/Yap* iCCA lesions.

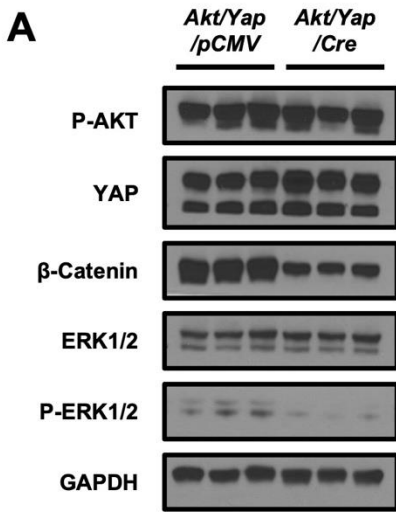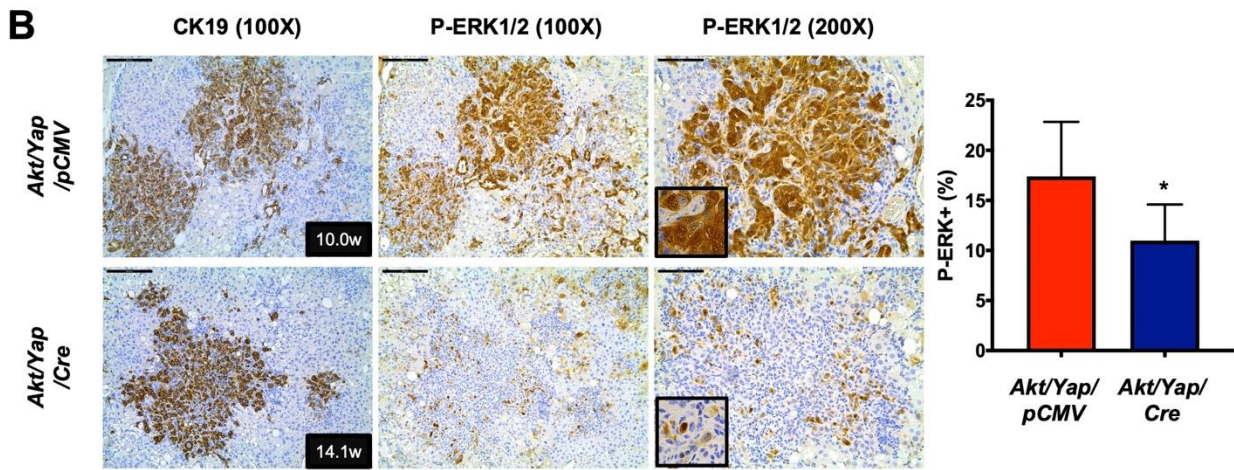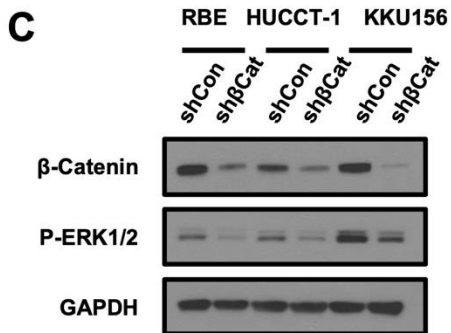



**Supplementary Figure 48.  $\beta$ -Catenin knockdown inhibits p-ERK expression in iCCA.**

(A) Western blot analysis and (B) immunohistochemistry were performed to detect p-ERK1/2 levels in *Ctnnb1*<sup>fllox/fllox</sup> *Akt/Yap/pCMV* and *Ctnnb1*<sup>fllox/fllox</sup> *Akt/Yap/Cre* iCCA lesions. GAPDH was used as a loading control. Statistical significance: \* $P < .05$ . (C) Western blot analysis of p-ERK1/2 in human iCCA cells transfected with pLKO.1-shCon (shCon) or pLKO.1-sh $\beta$ -Catenin (sh $\beta$ Cat). Scale bar: 100  $\mu$ m (100x) and 100  $\mu$ m (200X). Silencing of  $\beta$ -Catenin in RBE cells leads to the downregulation of genes involved in the Ras/MAPK signaling pathway.

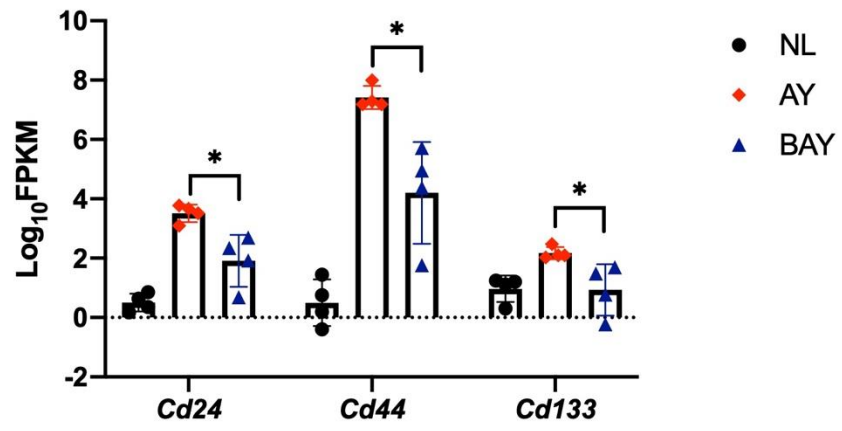

**Supplementary Figure 49. Expression pattern of cholangiocarcinoma stem cell markers in three different sample sets.**

The expression of *Cd24*, *Cd44*, and *Cd133* in NL, AY, and BAY samples based on the RNA Sequencing data. Statistical significance: \* $P < .05$ . Abbreviations: NL, normal liver; AY, *Akt/Yap* iCCA; BAY, *Ctnnb1<sup>flox/flox</sup> Akt/Yap/Cre* iCCA.

## 2. Supplementary Tables

**Supplementary Table 1. Plasmids used in the experiments**

| Study           | Plasmids                                                                                                                                                                                                                                                                                                                                                                                                                          |
|-----------------|-----------------------------------------------------------------------------------------------------------------------------------------------------------------------------------------------------------------------------------------------------------------------------------------------------------------------------------------------------------------------------------------------------------------------------------|
| <i>In vitro</i> | pT3-EF1a-HA-myr-Akt, pT3-EF1a-Flag-YapS127A, pT3-EF1a-Flag-YapS94A, pT3-EF1a, pT3-EF1a-dnTEAD2, pT3-EF1a-MYC-VGLL4, pT3-EF5a-Tead2VP16, pT3-EF1a-Flag-YapΔ(P+TBD), pT3-EF1a-Flag-YapΔWW, pT3-EF1a-Flag-YapΔSH3, pT3-EF1a-Flag-YapΔ(TAD+PDZ), pT3-EF1a-Flag-YapΔPDZ, pT3-EF1a-Myc-mNICD (NICD), pT3-EF1a-Tead2VP16, pT3-EF1a-MYC-AXIN2, pT3-EF1a-JAG1, pT3-EF1a-FAK, pCMV, pCMV-Cre and pCMV-sleeping beauty transposase (pCMV/SB) |
| <i>In vivo</i>  | psPAX2, pMD2.G, plenti-EGFP, plenti-dnTEAD2, pCW57.1-dnTCF4, plenti-FLAG-β-Catenin WT and pT3-EF1a-Myc-β-Catenin WT, pLKO.1-sc and pLKO.1-shβ-Catenin                                                                                                                                                                                                                                                                             |

**Supplementary Table 2. Plasmid dosages used for iCCA murine models**

| Mouse strain                      | iCCA murine model         | Plasmid dosages (μg)                      |
|-----------------------------------|---------------------------|-------------------------------------------|
| <i>FVB/N</i>                      | <i>Akt/Yap</i>            | Akt(20)+YapS127A(20)+SB(1.6)              |
| <i>FVB/N</i>                      | <i>Akt/YapS94A</i>        | Akt(20)+YapS94A(20)+SB(1.6)               |
| <i>FVB/N</i>                      | <i>Akt/Yap/pT3</i>        | Akt(20)+YapS127A(20)+pT3(60)+SB(4.0)      |
| <i>FVB/N</i>                      | <i>Akt/Yap/dnTEAD2</i>    | Akt(20)+YapS127A(20)+dnTEAD2(60)+SB(4.0)  |
| <i>FVB/N</i>                      | <i>Akt/Yap/VGLL4</i>      | Akt(20)+YapS127A(20)+VGLL4(60)+SB(4.0)    |
| <i>FVB/N</i>                      | <i>Akt/Tead2VP16</i>      | Akt(20)+Tead2VP16-5α(20)+SB(1.6)          |
| <i>FVB/N</i>                      | <i>Akt/YapΔWW</i>         | Akt(20)+YapΔWW(20)+SB(1.6)                |
| <i>FVB/N</i>                      | <i>Akt/YapΔSH3</i>        | Akt(20)+YapΔSH3(20)+SB(1.6)               |
| <i>FVB/N</i>                      | <i>Akt/YapΔPDZ</i>        | Akt(20)+YapΔPDZ(20)+SB(1.6)               |
| <i>FVB/N</i>                      | <i>Akt/Yap/Cre</i>        | Akt(20)+YapS127A(20)+Cre(60)+SB(4.0)      |
| <i>FVB/N</i>                      | <i>Akt/Yap/Axin2</i>      | Akt(20)+YapS127A(20)+AXIN2(60)+SB(4.0)    |
| <i>Ctnnb1<sup>flox/flox</sup></i> | <i>Akt/Yap/pCMV</i>       | Akt(20)+YapS127A(20)+pCMV(60)+SB(4.0)     |
| <i>Ctnnb1<sup>flox/flox</sup></i> | <i>Akt/Yap/Cre</i>        | Akt(20)+YapS127A(20)+Cre(60)+SB(4.0)      |
| <i>Yap<sup>flox/flox</sup></i>    | <i>Akt/Nicd/pCMV</i>      | Akt(20)+NICD(20)+pCMV(60)+SB(4.0)         |
| <i>Yap<sup>flox/flox</sup></i>    | <i>Akt/Nicd/Cre</i>       | Akt(20)+NICD(20)+Cre(60)+SB(4.0)          |
| <i>Ctnnb1<sup>flox/flox</sup></i> | <i>Akt/Nicd/pCMV</i>      | Akt(20)+NICD(20)+pCMV(60)+SB(4.0)         |
| <i>Ctnnb1<sup>flox/flox</sup></i> | <i>Akt/Nicd/Cre</i>       | Akt(20)+NICD(20)+Cre(60)+SB(4.0)          |
| <i>Ctnnb1<sup>flox/flox</sup></i> | <i>Akt/Tead2VP16/pCMV</i> | Akt(20)+Tead2VP16-1α(20)+pCMV(60)+SB(4.0) |
| <i>Ctnnb1<sup>flox/flox</sup></i> | <i>Akt/Tead2VP16/Cre</i>  | Akt(20)+Tead2VP16-1α(20)+Cre(60)+SB(4.0)  |
| <i>Ctnnb1<sup>flox/flox</sup></i> | <i>Akt/Jag1/Fak/pCMV</i>  | Akt(20)+JAG1(20)+FAK(30)+pCMV(60)+SB(5.2) |
| <i>Ctnnb1<sup>flox/flox</sup></i> | <i>Akt/Jag1/Fak/Cre</i>   | Akt(20)+JAG1(20)+FAK(30)+Cre(60)+SB(5.2)  |

**Supplementary Table 3. Basic information of iCCA murine models**

| Mouse strain | iCCA murine model  | Sex | Weeks post-injection | Body weight (g) | Liver weight (g) | Macroscopic view |
|--------------|--------------------|-----|----------------------|-----------------|------------------|------------------|
| <i>FVB/N</i> | <i>Akt/Yap</i>     | M   | 2.5                  | 23.9            | 2.0              | Nodules          |
| <i>FVB/N</i> | <i>Akt/Yap</i>     | M   | 3.0                  | 20.8            | 1.8              | Nodules          |
| <i>FVB/N</i> | <i>Akt/Yap</i>     | M   | 3.5                  | 25.7            | 2.0              | Nodules          |
| <i>FVB/N</i> | <i>Akt/Yap</i>     | M   | 5.7                  | 27.6            | 1.8              | Tumors           |
| <i>FVB/N</i> | <i>Akt/Yap</i>     | F   | 5.8                  | 21.2            | 2.2              | Tumors           |
| <i>FVB/N</i> | <i>Akt/Yap</i>     | M   | 6.0                  | 30.4            | 2.9              | Tumors           |
| <i>FVB/N</i> | <i>Akt/Yap</i>     | M   | 6.0                  | 27.3            | 2.1              | Tumors           |
| <i>FVB/N</i> | <i>Akt/Yap</i>     | M   | 7.1                  | 27.3            | 2.8              | Tumors           |
| <i>FVB/N</i> | <i>Akt/Yap</i>     | F   | 7.6                  | 22.6            | 3.2              | Tumors           |
| <i>FVB/N</i> | <i>Akt/Yap</i>     | M   | 7.9                  | 30.8            | 5.3              | Tumors           |
| <i>FVB/N</i> | <i>Akt/Yap</i>     | M   | 9.1                  | 35.5            | 5.8              | Tumors           |
| <i>FVB/N</i> | <i>Akt/Yap</i>     | F   | 9.6                  | 27.9            | 4.5              | Tumors           |
| <i>FVB/N</i> | <i>Akt/Yap</i>     | F   | 9.6                  | 32.8            | 5.6              | Tumors           |
| <i>FVB/N</i> | <i>Akt/Yap</i>     | M   | 10.4                 | 30.3            | 3.5              | Tumors           |
| <i>FVB/N</i> | <i>Akt/Yap</i>     | M   | 10.8                 | 32.5            | 4.2              | Tumors           |
| <i>FVB/N</i> | <i>Akt/Yap</i>     | M   | 10.8                 | 28.7            | 3.6              | Tumors           |
| <i>FVB/N</i> | <i>Akt/Yap</i>     | M   | 11.0                 | 31.9            | 3.7              | Tumors           |
| <i>FVB/N</i> | <i>Akt/Yap</i>     | M   | 11.0                 | 34.2            | 7.7              | Tumors           |
| <i>FVB/N</i> | <i>Akt/YapS94A</i> | M   | 5.7                  | 25.5            | 2.0              | Normal           |
| <i>FVB/N</i> | <i>Akt/YapS94A</i> | M   | 6.0                  | 26.3            | 2.0              | Normal           |
| <i>FVB/N</i> | <i>Akt/YapS94A</i> | M   | 7.0                  | 30.0            | 2.2              | Normal           |
| <i>FVB/N</i> | <i>Akt/YapS94A</i> | M   | 7.0                  | 30.7            | 2.5              | Normal           |
| <i>FVB/N</i> | <i>Akt/YapS94A</i> | M   | 8.6                  | 21.4            | 1.7              | Normal           |
| <i>FVB/N</i> | <i>Akt/YapS94A</i> | M   | 8.6                  | 21.9            | 1.3              | Normal           |
| <i>FVB/N</i> | <i>Akt/YapS94A</i> | M   | 10.4                 | 33.6            | 2.5              | Normal           |
| <i>FVB/N</i> | <i>Akt/YapS94A</i> | M   | 10.8                 | 31.4            | 2.0              | Normal           |
| <i>FVB/N</i> | <i>Akt/YapS94A</i> | M   | 10.8                 | 29.1            | 1.9              | Normal           |
| <i>FVB/N</i> | <i>Akt/YapS94A</i> | M   | 11.0                 | 33.2            | 1.9              | Normal           |
| <i>FVB/N</i> | <i>Akt/YapS94A</i> | F   | 21.1                 | 24.1            | 1.7              | Normal           |
| <i>FVB/N</i> | <i>Akt/Yap/pT3</i> | M   | 5.0                  | 28.8            | 2.2              | Nodules          |
| <i>FVB/N</i> | <i>Akt/Yap/pT3</i> | M   | 6.9                  | 26.4            | 2.5              | Tumors           |
| <i>FVB/N</i> | <i>Akt/Yap/pT3</i> | F   | 6.9                  | 23.7            | 4.8              | Tumors           |
| <i>FVB/N</i> | <i>Akt/Yap/pT3</i> | M   | 7.6                  | 31.3            | 4.6              | Tumors           |
| <i>FVB/N</i> | <i>Akt/Yap/pT3</i> | F   | 8.0                  | 25.2            | 5.5              | Tumors           |
| <i>FVB/N</i> | <i>Akt/Yap/pT3</i> | M   | 9.1                  | 36.4            | 4.3              | Tumors           |
| <i>FVB/N</i> | <i>Akt/Yap/pT3</i> | F   | 9.4                  | 26.5            | 4.9              | Tumors           |
| <i>FVB/N</i> | <i>Akt/Yap/pT3</i> | F   | 9.4                  | 24.5            | 5.1              | Tumors           |
| <i>FVB/N</i> | <i>Akt/Yap/pT3</i> | M   | 9.7                  | 30.1            | 5.5              | Tumors           |
| <i>FVB/N</i> | <i>Akt/Yap/pT3</i> | M   | 9.8                  | 27.6            | 2.9              | Tumors           |
| <i>FVB/N</i> | <i>Akt/Yap/pT3</i> | M   | 10.3                 | 30.0            | 4.8              | Tumors           |
| <i>FVB/N</i> | <i>Akt/Yap/pT3</i> | M   | 10.7                 | 31.2            | 3.9              | Tumors           |
| <i>FVB/N</i> | <i>Akt/Yap/pT3</i> | M   | 10.7                 | 31.9            | 4.1              | Tumors           |
| <i>FVB/N</i> | <i>Akt/Yap/pT3</i> | M   | 10.8                 | 35.3            | 5.2              | Tumors           |
| <i>FVB/N</i> | <i>Akt/Yap/pT3</i> | M   | 7.7                  | 31.9            | 3.02             | Tumors           |

|       |                        |   |       |       |      |         |
|-------|------------------------|---|-------|-------|------|---------|
| FVB/N | <i>Akt/Yap/pT3</i>     | F | 8.1   | 25.69 | 6.11 | Tumors  |
| FVB/N | <i>Akt/Yap/pT3</i>     | F | 10.7  | 32    | 8.59 | Tumors  |
| FVB/N | <i>Akt/Yap/dnTEAD2</i> | M | 4.0   | 25.4  | 1.7  | Nodules |
| FVB/N | <i>Akt/Yap/dnTEAD2</i> | M | 5.0   | 26.0  | 1.8  | Nodules |
| FVB/N | <i>Akt/Yap/dnTEAD2</i> | M | 11.4  | 31.5  | 2.0  | Nodules |
| FVB/N | <i>Akt/Yap/dnTEAD2</i> | M | 17.4  | 31.6  | 2.6  | Tumors  |
| FVB/N | <i>Akt/Yap/dnTEAD2</i> | M | 17.4  | 31.4  | 3.7  | Tumors  |
| FVB/N | <i>Akt/Yap/dnTEAD2</i> | M | 17.85 | 33.2  | 5.2  | Tumors  |
| FVB/N | <i>Akt/Yap/dnTEAD2</i> | M | 18.0  | 32.8  | 6.9  | Tumors  |
| FVB/N | <i>Akt/Yap/dnTEAD2</i> | M | 21.9  | 33.6  | 4.0  | Tumors  |
| FVB/N | <i>Akt/Yap/VGLL4</i>   | M | 10.7  | 33.9  | 2.3  | Normal  |
| FVB/N | <i>Akt/Yap/VGLL4</i>   | F | 17.8  | 25.8  | 5.4  | Tumors  |
| FVB/N | <i>Akt/Yap/VGLL4</i>   | F | 17.8  | 21.0  | 6.5  | Tumors  |
| FVB/N | <i>Akt/Yap/VGLL4</i>   | F | 17.8  | 31.7  | 4.6  | Tumors  |
| FVB/N | <i>Akt/Yap/VGLL4</i>   | M | 19.4  | 30.9  | 1.8  | Normal  |
| FVB/N | <i>Akt/Yap/VGLL4</i>   | M | 19.4  | 43.6  | 2.5  | Nodules |
| FVB/N | <i>Akt/TEAD2vp16</i>   | M | 3.0   | 22.8  | 1.8  | Normal  |
| FVB/N | <i>Akt/TEAD2vp16</i>   | M | 3.5   | 28.5  | 2.6  | Normal  |
| FVB/N | <i>Akt/TEAD2vp16</i>   | M | 4.0   | 28.8  | 1.9  | Normal  |
| FVB/N | <i>Akt/TEAD2vp16</i>   | M | 4.0   | 26.3  | 1.6  | Normal  |
| FVB/N | <i>Akt/TEAD2vp16</i>   | M | 5.7   | 26.6  | 2.0  | Normal  |
| FVB/N | <i>Akt/TEAD2vp16</i>   | M | 5.7   | 27.9  | 2.0  | Normal  |
| FVB/N | <i>Akt/TEAD2vp16</i>   | M | 6.0   | 28.8  | 2.4  | Normal  |
| FVB/N | <i>Akt/TEAD2vp16</i>   | M | 6.5   | 25.3  | 1.9  | Normal  |
| FVB/N | <i>Akt/TEAD2vp16</i>   | M | 7.1   | 28.1  | 2.1  | Normal  |
| FVB/N | <i>Akt/TEAD2vp16</i>   | M | 7.9   | 30.6  | 2.4  | Nodules |
| FVB/N | <i>Akt/TEAD2vp16</i>   | M | 7.9   | 31.8  | 2.7  | Nodules |
| FVB/N | <i>Akt/TEAD2vp16</i>   | M | 9.0   | 30.5  | 2.3  | Tumors  |
| FVB/N | <i>Akt/TEAD2vp16</i>   | M | 9.1   | 36.3  | 2.9  | Tumors  |
| FVB/N | <i>Akt/TEAD2vp16</i>   | M | 9.1   | 38.4  | 2.9  | Tumors  |
| FVB/N | <i>Akt/TEAD2vp16</i>   | M | 10.4  | 29.8  | 2.5  | Tumors  |
| FVB/N | <i>Akt/TEAD2vp16</i>   | M | 10.4  | 31.0  | 2.2  | Tumors  |
| FVB/N | <i>Akt/TEAD2vp16</i>   | M | 10.4  | 27.9  | 2.8  | Tumors  |
| FVB/N | <i>Akt/TEAD2vp16</i>   | F | 10.6  | 27.1  | 3.8  | Tumors  |
| FVB/N | <i>Akt/TEAD2vp16</i>   | M | 10.8  | 32.5  | 2.5  | Tumors  |
| FVB/N | <i>Akt/TEAD2vp16</i>   | F | 14.1  | 29.8  | 7.4  | Tumors  |
| FVB/N | <i>Akt/TEAD2vp16</i>   | F | 15.1  | 28.8  | 5.9  | Tumors  |
| FVB/N | <i>Akt/TEAD2vp16</i>   | F | 18.1  | 28.2  | 6.2  | Tumors  |
| FVB/N | <i>Akt/Yap-ΔWW</i>     | M | 3.0   | 25.3  | 5.2  | Tumors  |
| FVB/N | <i>Akt/Yap-ΔWW</i>     | M | 3.0   | 25.4  | 5.2  | Tumors  |
| FVB/N | <i>Akt/Yap-ΔWW</i>     | F | 3.6   | 19.7  | 3.6  | Tumors  |
| FVB/N | <i>Akt/Yap-ΔWW</i>     | F | 4.0   | 26.3  | 4.1  | Tumors  |
| FVB/N | <i>Akt/Yap-ΔWW</i>     | F | 4.0   | 25.2  | 4.8  | Tumors  |
| FVB/N | <i>Akt/Yap-ΔSH3</i>    | M | 8.7   | 32.4  | 5.2  | Tumors  |

|                                     |                      |   |      |                        |      |         |
|-------------------------------------|----------------------|---|------|------------------------|------|---------|
| FVB/N                               | <i>Akt/Yap-ΔSH3</i>  | M | 9.9  | 29.3                   | 3.2  | Tumors  |
| FVB/N                               | <i>Akt/Yap-ΔSH3</i>  | M | 9.9  | 28.8                   | 5.7  | Tumors  |
| FVB/N                               | <i>Akt/Yap-ΔSH3</i>  | M | 9.9  | 29.6                   | 5.3  | Tumors  |
| FVB/N                               | <i>Akt/Yap-ΔSH3</i>  | M | 11.3 | 31.6                   | 5.5  | Tumors  |
|                                     |                      |   |      |                        |      |         |
| FVB/N                               | <i>Akt/Yap-ΔPDZ</i>  | F | 5.28 | 21.9                   | 3.3  | Tumors  |
| FVB/N                               | <i>Akt/Yap-ΔPDZ</i>  | F | 5.8  | 23.5                   | 2.8  | Tumors  |
| FVB/N                               | <i>Akt/Yap-ΔPDZ</i>  | F | 6.0  | 29.5                   | 3.6  | Tumors  |
| FVB/N                               | <i>Akt/Yap-ΔPDZ</i>  | F | 6.0  | 20.5                   | 5.0  | Tumors  |
|                                     |                      |   |      |                        |      |         |
| FVB/N                               | <i>Akt/Yap/Cre</i>   | F | 7.6  | Died (ascites, tumors) |      |         |
| FVB/N                               | <i>Akt/Yap/Cre</i>   | F | 10.1 | 29                     | 4.7  | Tumors  |
| FVB/N                               | <i>Akt/Yap/Cre</i>   | F | 10.1 | 23.3                   | 5.2  | Tumors  |
|                                     |                      |   |      |                        |      |         |
| FVB/N                               | <i>Akt/Yap/Axin2</i> | M | 7.7  | 32.5                   | 2.5  | Normal  |
| FVB/N                               | <i>Akt/Yap/Axin2</i> | M | 7.7  | 36.5                   | 2.38 | Nodules |
| FVB/N                               | <i>Akt/Yap/Axin2</i> | F | 9.4  | 30.22                  | 2.06 | Tumors  |
| FVB/N                               | <i>Akt/Yap/Axin2</i> | F | 11.4 | 23.18                  | 1.72 | Tumors  |
| FVB/N                               | <i>Akt/Yap/Axin2</i> | F | 11.4 | 29.07                  | 2.26 | Tumors  |
|                                     |                      |   |      |                        |      |         |
| <i>Ctnnb1<sup>fllox/fllox</sup></i> | <i>Akt/Yap/pCMV</i>  | F | 6.9  | 24.7                   | 7.6  | Tumors  |
| <i>Ctnnb1<sup>fllox/fllox</sup></i> | <i>Akt/Yap/pCMV</i>  | F | 6.9  | 25.2                   | 9.0  | Tumors  |
| <i>Ctnnb1<sup>fllox/fllox</sup></i> | <i>Akt/Yap/pCMV</i>  | F | 7.1  | 28.2                   | 4.8  | Tumors  |
| <i>Ctnnb1<sup>fllox/fllox</sup></i> | <i>Akt/Yap/pCMV</i>  | M | 8.9  | 31.2                   | 6.5  | Tumors  |
| <i>Ctnnb1<sup>fllox/fllox</sup></i> | <i>Akt/Yap/pCMV</i>  | M | 9.3  | 31.0                   | 6.7  | Tumors  |
| <i>Ctnnb1<sup>fllox/fllox</sup></i> | <i>Akt/Yap/pCMV</i>  | F | 9.3  | 28.2                   | 8.7  | Tumors  |
| <i>Ctnnb1<sup>fllox/fllox</sup></i> | <i>Akt/Yap/pCMV</i>  | F | 9.3  | 28.3                   | 11.1 | Tumors  |
| <i>Ctnnb1<sup>fllox/fllox</sup></i> | <i>Akt/Yap/pCMV</i>  | M | 9.8  | 34.3                   | 5.8  | Tumors  |
| <i>Ctnnb1<sup>fllox/fllox</sup></i> | <i>Akt/Yap/pCMV</i>  | F | 10.0 | 26.2                   | 7.0  | Tumors  |
| <i>Ctnnb1<sup>fllox/fllox</sup></i> | <i>Akt/Yap/pCMV</i>  | F | 10.0 | 26.5                   | 8.1  | Tumors  |
| <i>Ctnnb1<sup>fllox/fllox</sup></i> | <i>Akt/Yap/pCMV</i>  | F | 10.0 | 30.0                   | 9.8  | Tumors  |
|                                     |                      |   |      |                        |      |         |
| <i>Ctnnb1<sup>fllox/fllox</sup></i> | <i>Akt/Yap/Cre</i>   | F | 7.6  | 23.9                   | 1.7  | Normal  |
| <i>Ctnnb1<sup>fllox/fllox</sup></i> | <i>Akt/Yap/Cre</i>   | M | 8.9  | 29.8                   | 1.8  | Normal  |
| <i>Ctnnb1<sup>fllox/fllox</sup></i> | <i>Akt/Yap/Cre</i>   | M | 9.3  | 30.2                   | 1.5  | Nodules |
| <i>Ctnnb1<sup>fllox/fllox</sup></i> | <i>Akt/Yap/Cre</i>   | M | 9.8  | 31.3                   | 1.5  | Nodules |
| <i>Ctnnb1<sup>fllox/fllox</sup></i> | <i>Akt/Yap/Cre</i>   | F | 14.1 | 31.1                   | 1.8  | Tumors  |
| <i>Ctnnb1<sup>fllox/fllox</sup></i> | <i>Akt/Yap/Cre</i>   | F | 15.3 | 23.7                   | 1.1  | Tumors  |
| <i>Ctnnb1<sup>fllox/fllox</sup></i> | <i>Akt/Yap/Cre</i>   | F | 20.9 | 31.4                   | 1.6  | Tumors  |
| <i>Ctnnb1<sup>fllox/fllox</sup></i> | <i>Akt/Yap/Cre</i>   | F | 20.9 | 29.6                   | 5.0  | Tumors  |
| <i>Ctnnb1<sup>fllox/fllox</sup></i> | <i>Akt/Yap/Cre</i>   | M | 22.6 | 37.8                   | 1.8  | Tumors  |
| <i>Ctnnb1<sup>fllox/fllox</sup></i> | <i>Akt/Yap/Cre</i>   | M | 22.6 | 30.7                   | 2.2  | Tumors  |
| <i>Ctnnb1<sup>fllox/fllox</sup></i> | <i>Akt/Yap/Cre</i>   | M | 22.6 | 37.4                   | 2.1  | Normal  |
| <i>Ctnnb1<sup>fllox/fllox</sup></i> | <i>Akt/Yap/Cre</i>   | F | 26.2 | 28.8                   | 4.3  | Tumors  |
| <i>Ctnnb1<sup>fllox/fllox</sup></i> | <i>Akt/Yap/Cre</i>   | F | 26.6 | 28.5                   | 5.9  | Tumors  |
| <i>Ctnnb1<sup>fllox/fllox</sup></i> | <i>Akt/Yap/Cre</i>   | F | 26.6 | 30.7                   | 6.8  | Tumors  |
|                                     |                      |   |      |                        |      |         |
| <i>Yap<sup>fllox/fllox</sup></i>    | <i>Akt/Nicd/pCMV</i> | F | 3.4  | 24.3                   | 3.1  | Tumors  |
| <i>Yap<sup>fllox/fllox</sup></i>    | <i>Akt/Nicd/pCMV</i> | F | 3.4  | 26.2                   | 3.83 | Tumors  |

|                                   |                           |   |      |                          |      |                        |
|-----------------------------------|---------------------------|---|------|--------------------------|------|------------------------|
| <i>Yap<sup>flox/flox</sup></i>    | <i>Akt/Nicd/pCMV</i>      | M | 3.8  | 25.5                     | 10.5 | Tumors                 |
| <i>Yap<sup>flox/flox</sup></i>    | <i>Akt/Nicd/pCMV</i>      | M | 4.1  | Died (high tumor burden) |      |                        |
| <i>Yap<sup>flox/flox</sup></i>    | <i>Akt/Nicd/pCMV</i>      | M | 4.1  | Died (high tumor burden) |      |                        |
| <i>Yap<sup>flox/flox</sup></i>    | <i>Akt/Nicd/pCMV</i>      | M | 4.1  | Died (high tumor burden) |      |                        |
| <i>Yap<sup>flox/flox</sup></i>    | <i>Akt/Nicd/pCMV</i>      | M | 4.2  | Died (high tumor burden) |      |                        |
| <i>Yap<sup>flox/flox</sup></i>    | <i>Akt/Nicd/Cre</i>       | F | 3.4  | 24.4                     | 1.34 | Normal                 |
| <i>Yap<sup>flox/flox</sup></i>    | <i>Akt/Nicd/Cre</i>       | M | 5.9  | Died (high tumor burden) |      |                        |
| <i>Yap<sup>flox/flox</sup></i>    | <i>Akt/Nicd/Cre</i>       | M | 6.0  | 31.2                     | 10   | Tumors                 |
| <i>Yap<sup>flox/flox</sup></i>    | <i>Akt/Nicd/Cre</i>       | M | 6.0  | 29.5                     | 6.5  | Tumors                 |
| <i>Yap<sup>flox/flox</sup></i>    | <i>Akt/Nicd/Cre</i>       | M | 6.4  | 30                       | 7.5  | Tumors                 |
| <i>Yap<sup>flox/flox</sup></i>    | <i>Akt/Nicd/Cre</i>       | M | 7.6  | 28.4                     | 5.7  | Tumors                 |
| <i>Ctnnb1<sup>flox/flox</sup></i> | <i>Akt/Nicd/pCMV</i>      | M | 4.2  | 27.2                     | 4.22 | Tumors                 |
| <i>Ctnnb1<sup>flox/flox</sup></i> | <i>Akt/Nicd/pCMV</i>      | M | 4.2  | 29                       | 5.0  | Tumors                 |
| <i>Ctnnb1<sup>flox/flox</sup></i> | <i>Akt/Nicd/pCMV</i>      | M | 5.0  | Died (high tumor burden) |      |                        |
| <i>Ctnnb1<sup>flox/flox</sup></i> | <i>Akt/Nicd/pCMV</i>      | F | 5.14 | 22                       | 4.0  | Tumors                 |
| <i>Ctnnb1<sup>flox/flox</sup></i> | <i>Akt/Nicd/pCMV</i>      | M | 5.28 | Died (high tumor burden) |      |                        |
| <i>Ctnnb1<sup>flox/flox</sup></i> | <i>Akt/Nicd/pCMV</i>      | F | 5.86 | Died (high tumor burden) |      |                        |
| <i>Ctnnb1<sup>flox/flox</sup></i> | <i>Akt/Nicd/pCMV</i>      | M | 6.0  | 35.7                     | 6.1  | Tumors                 |
| <i>Ctnnb1<sup>flox/flox</sup></i> | <i>Akt/Nicd/Cre</i>       | M | 6.0  | 31.5                     | 2.95 | Tumors                 |
| <i>Ctnnb1<sup>flox/flox</sup></i> | <i>Akt/Nicd/Cre</i>       | M | 6.0  | Died (high tumor burden) |      |                        |
| <i>Ctnnb1<sup>flox/flox</sup></i> | <i>Akt/Nicd/Cre</i>       | M | 6.3  | 32                       | 12   | Tumors                 |
| <i>Ctnnb1<sup>flox/flox</sup></i> | <i>Akt/Nicd/Cre</i>       | M | 6.3  | 30.56                    | 8.28 | Tumors                 |
| <i>Ctnnb1<sup>flox/flox</sup></i> | <i>Akt/Nicd/Cre</i>       | F | 6.4  | 25.8                     | 2.57 | Tumors                 |
| <i>Ctnnb1<sup>flox/flox</sup></i> | <i>Akt/Nicd/Cre</i>       | F | 6.4  | 26.2                     | 5.9  | Tumors                 |
| <i>Ctnnb1<sup>flox/flox</sup></i> | <i>Akt/Nicd/Cre</i>       | M | 7.2  | 28.74                    | 4.81 | Tumors                 |
| <i>Ctnnb1<sup>flox/flox</sup></i> | <i>Akt/Nicd/Cre</i>       | M | 7.2  | 31.7                     | 7.8  | Tumors                 |
| <i>Ctnnb1<sup>flox/flox</sup></i> | <i>Akt/Tead2VP16/pCMV</i> | F | 10.6 | 30.36                    | 3.25 | Died (ascites, tumors) |
| <i>Ctnnb1<sup>flox/flox</sup></i> | <i>Akt/Tead2VP16/pCMV</i> | M | 10.7 | 31.8                     | 3.46 | Died (ascites, tumors) |
| <i>Ctnnb1<sup>flox/flox</sup></i> | <i>Akt/Tead2VP16/pCMV</i> | M | 17.6 | 33.18                    | 3.27 | Tumors                 |
| <i>Ctnnb1<sup>flox/flox</sup></i> | <i>Akt/Tead2VP16/pCMV</i> | F | 17.6 | 28.77                    | 2.15 | Tumors                 |
| <i>Ctnnb1<sup>flox/flox</sup></i> | <i>Akt/Tead2VP16/Cre</i>  | F | 11.9 | 32.92                    | 2.01 | Died (ascites, tumors) |
| <i>Ctnnb1<sup>flox/flox</sup></i> | <i>Akt/Tead2VP16/Cre</i>  | M | 13.3 | 31.9                     | 2.57 | Died (ascites, tumors) |
| <i>Ctnnb1<sup>flox/flox</sup></i> | <i>Akt/Tead2VP16/Cre</i>  | F | 16.4 | 33.5                     | 2.3  | Died (ascites, tumors) |
| <i>Ctnnb1<sup>flox/flox</sup></i> | <i>Akt/Tead2VP16/Cre</i>  | F | 17.6 | 34.86                    | 2.01 | Tumors                 |
| <i>Ctnnb1<sup>flox/flox</sup></i> | <i>Akt/Jag1/Fak/pCMV</i>  | F | 11.3 | 26.6                     | 8.37 | Tumors                 |
| <i>Ctnnb1<sup>flox/flox</sup></i> | <i>Akt/Jag1/Fak/pCMV</i>  | F | 11.3 | 26.4                     | 6.5  | Tumors                 |
| <i>Ctnnb1<sup>flox/flox</sup></i> | <i>Akt/Jag1/Fak/pCMV</i>  | M | 13.1 | 31.1                     | 4.1  | Tumors                 |
| <i>Ctnnb1<sup>flox/flox</sup></i> | <i>Akt/Jag1/Fak/pCMV</i>  | M | 13.1 | 31.2                     | 3.51 | Tumors                 |



|                                    |                         |   |      |      |      |         |
|------------------------------------|-------------------------|---|------|------|------|---------|
| <i>Ctnnb1</i> <sup>flox/flox</sup> | <i>Akt/Jag1/Fak/Cre</i> | F | 11.3 | 24.2 | 1.3  | Nodules |
| <i>Ctnnb1</i> <sup>flox/flox</sup> | <i>Akt/Jag1/Fak/Cre</i> | F | 11.3 | 22.7 | 1.1  | Normal  |
| <i>Ctnnb1</i> <sup>flox/flox</sup> | <i>Akt/Jag1/Fak/Cre</i> | M | 13.8 | 16.0 | 0.8  | Normal  |
| <i>Ctnnb1</i> <sup>flox/flox</sup> | <i>Akt/Jag1/Fak/Cre</i> | F | 28.0 | 23.0 | 1.86 | Tumors  |
| <i>Ctnnb1</i> <sup>flox/flox</sup> | <i>Akt/Jag1/Fak/Cre</i> | F | 35.0 | 25.7 | 1.85 | Tumors  |
| <i>Ctnnb1</i> <sup>flox/flox</sup> | <i>Akt/Jag1/Fak/Cre</i> | F | 35.0 | 25.1 | 1.5  | Tumors  |

**Supplementary Table 4. Clinicopathological features of iCCA patients**

| Variables             |    |
|-----------------------|----|
| No. of patients       | 58 |
| Male                  | 35 |
| Female                | 23 |
| Age (years)           |    |
| <60                   | 15 |
| ≥60                   | 43 |
| Etiology              |    |
| HBV                   | 12 |
| HCV                   | 8  |
| Hepatolithiasis       | 11 |
| PSC                   | 2  |
| NA                    | 25 |
| Liver cirrhosis       |    |
| Yes                   | 23 |
| No                    | 35 |
| Tumor differentiation |    |
| Well                  | 28 |
| Moderately            | 22 |
| Poorly                | 8  |
| Tumor size (cm)       |    |
| <5                    | 38 |
| >5                    | 20 |
| Tumor number          |    |
| Single                | 43 |
| Multiple              | 15 |
| Prognosis             |    |
| Better<br>(≥ 3 years) | 12 |
| Poorer<br>(< 3 years) | 46 |
| Lymph node metastasis |    |
| Yes                   | 23 |
| No                    | 35 |

|                 |    |
|-----------------|----|
| Lung metastasis |    |
| Yes             | 12 |
| No              | 46 |

Abbreviations: NA, not available; PSC, primary sclerosing cholangitis

**Supplementary Table 5. Primary antibodies information for immunohistochemistry**

| Antibody                                                | Species | Dilution | Company                   | Catalog Number |
|---------------------------------------------------------|---------|----------|---------------------------|----------------|
| CK19                                                    | Rabbit  | 1:1000   | Abcam                     | Ab133496       |
| HA                                                      | Rabbit  | 1:100    | Cell Signaling Technology | 3724           |
| Ki-67                                                   | Rabbit  | 1:150    | Thermo Fisher Scientific  | MA5-14520      |
| $\beta$ -Catenin                                        | Mouse   | 1:200    | BD Biosciences            | BD610153       |
| YAP                                                     | Rabbit  | 1:100    | Cell Signaling Technology | 14074          |
| CD31                                                    | Rabbit  | 1:100    | Cell Signaling Technology | 77699          |
| Vimentin                                                | Rabbit  | 1:200    | Cell Signaling Technology | 5741           |
| Non-phospho- $\beta$ -Catenin <sup>Ser33/37/Thr41</sup> | Rabbit  | 1:400    | Cell Signaling Technology | 8814           |
| P-ERK1/2                                                | Rabbit  | 1:500    | Cell Signaling Technology | 4370           |
| Second antibody<br>Goat anti-Rabbit                     |         | 1:500    | Invitrogen                | B2770          |
| Second antibody<br>Goat anti-Mouse                      |         | 1:250    | Vector Laboratories       | BMK2202        |

**Supplementary Table 6. Primary antibodies information for Western blot analysis**

| Antibody                       | Species | Dilution | Company                   | Catalog Number |
|--------------------------------|---------|----------|---------------------------|----------------|
| YAP                            | Rabbit  | 1:1000   | Cell Signaling Technology | 14074          |
| $\beta$ -Catenin               | Mouse   | 1:2000   | BD Biosciences            | BD610153       |
| Pan-TEADs                      | Rabbit  | 1:1000   | Cell Signaling Technology | 13295          |
| FLAG-Tag                       | Rabbit  | 1:1000   | Cell Signaling Technology | 14793          |
| MYC-Tag                        | Mouse   | 1:1000   | Cell Signaling Technology | 2276           |
| HA-Tag                         | Rabbit  | 1:1000   | Cell Signaling Technology | 3724           |
| T-AKT                          | Rabbit  | 1:2000   | Cell Signaling Technology | 9272           |
| p-AKT <sup>Ser473</sup>        | Rabbit  | 1:1000   | Cell Signaling Technology | 3787           |
| p-AKT <sup>Thr308</sup>        | Rabbit  | 1:1000   | Cell Signaling Technology | 9275           |
| 4EBP1                          | Rabbit  | 1:1000   | Cell Signaling Technology | 9644           |
| p-4EBP1 <sup>Thr37/Thr46</sup> | Rabbit  | 1:2000   | Cell Signaling Technology | 2855           |
| p-RPS6                         | Rabbit  | 1:1000   | Cell Signaling Technology | 4858           |
| NOTCH2                         | Rabbit  | 1:2000   |                           | 5732           |
| JAGGED1                        | Rabbit  | 1:1000   | Abcam                     | Ab109536       |
| SURVIVIN                       | Rabbit  | 1:1000   | Cell Signaling Technology | 2808           |
| PCNA                           | Mouse   | 1:2000   | Cell Signaling Technology | 2586           |
| HISTONE H3                     | Rabbit  | 1:2000   | Cell Signaling Technology | 4499           |
| $\beta$ -Tubulin               | Rabbit  | 1:1000   | Abcam                     | Ab6046         |

|                                                         |        |        |                           |          |
|---------------------------------------------------------|--------|--------|---------------------------|----------|
| ERK                                                     | Rabbit | 1:1000 | Cell Signaling Technology | 9102     |
| P-ERK                                                   | Rabbit | 1:1000 | Cell Signaling Technology | 4370     |
| FAK                                                     | Rabbit | 1:1000 | Cell Signaling Technology | 3285     |
| Non-phospho- $\beta$ -Catenin <sup>Ser33/37/Thr41</sup> | Rabbit | 1:1000 | Cell Signaling Technology | 4270     |
| GAPDH                                                   | Rabbit | 1:2000 | Cell Signaling Technology | 5174     |
| Second antibodies<br>Goat anti-Rabbit                   |        | 1:500  | Abcam                     | ab205718 |
| Second antibodies<br>Goat anti-mouse                    |        | 1:500  | Invitrogen                | MA511306 |

**Supplementary Table 7. Primary antibodies information for immunofluorescence**

| Antibody                                                      | Species | Dilution | Company                   | Catalog Number |
|---------------------------------------------------------------|---------|----------|---------------------------|----------------|
| YAP                                                           | Rabbit  | 1:100    | Cell Signaling Technology | 14074          |
| $\beta$ -Catenin                                              | Mouse   | 1:200    | BD Biosciences            | 610153         |
| CK19                                                          | Rabbit  | 1:200    | Abcam                     | Ab133496       |
| CD31                                                          | Rabbit  | 1:100    | Cell Signaling Technology | 77699          |
| Vimentin                                                      | Rabbit  | 1:100    | Cell Signaling Technology | 5741           |
| Pan-TEADs                                                     | Rabbit  | 1:1000   | Cell Signaling Technology | 13295          |
| Goat anti-Rabbit<br>Secondary<br>antibody, Alexa<br>Fluor 488 |         | 1:1000   | Invitrogen                | A21295         |
| Goat anti-Rabbit<br>Secondary<br>antibody, Alexa<br>Fluor 594 |         | 1:1000   | Invitrogen                | A11012         |
| Goat anti-Mouse<br>Secondary<br>antibody, Alexa<br>Fluor 488  |         | 1:1000   | Invitrogen                | A11001         |
| Goat anti-Mouse<br>Secondary<br>antibody, Alexa<br>Fluor 568  |         | 1:1000   | Invitrogen                | A11004         |

**Supplementary Table 8. Primers sequences used for qRT-PCR analysis**

| Gene                | Forward sequence (5'-3') | Reverse sequence (5'-3') |
|---------------------|--------------------------|--------------------------|
| 18s rRNA            | CGGCTACCACATCCAAGGAA     | 5'-GCTGGAATTACCGCGGCT-3' |
| Human- <i>CTGF</i>  | CAGCATGGACGTTCTCTG       | AACCACGGTTTGGTCCTTGG     |
| Human- <i>CYR61</i> | GGTCAAAGTTACCGGGCAGT     | GGAGGCATCGAATCCCAGC      |

|                           |                          |                          |
|---------------------------|--------------------------|--------------------------|
| Human-<br><i>YAP1</i>     | TAGCCCTGCGTAGCCAGTTA     | TCATGCTTAGTCCACTGTCTGT   |
| Human-<br><i>WWTR1</i>    | TCCCAGCCAAATCTCGTGATG    | AGCGCATTGGGCATACTCAT     |
| Human-<br><i>CTNNB1</i>   | AAAGCGGCTGTTAGTCACTGG    | CGAGTCATTGCATACTGTCCAT   |
| Human-<br><i>AXIN2</i>    | TACACTCCTTATTGGGCGATCA   | TTGGCTACTCGTAAAGTTTTGGT  |
| Human-<br><i>CRIM1</i>    | AGTTTCCAAGTCAGGATATGTGC  | AGCATAACCCTCGATCAGAACA   |
| Human-<br><i>CCDC80</i>   | GACCCCGTTTCACTATGCTGT    | GGCGAGCTAGTCTCAACACG     |
| Human-<br><i>ABCB1</i>    | TTGCTGCTTACATTCAGGTTTCA  | AGCCTATCTCCTGTCTGCATTA   |
| Human-<br><i>AREG</i>     | GTGGTGCTGTCGCTCTTGATA    | CCCCAGAAAATGGTTCACGCT    |
| Mouse-<br><i>Ctcf</i>     | GGGCCTCTTCTGCGATTTTC     | ATCCAGGCAAGTGCATTGGTA    |
| Mouse-<br><i>Cyr61</i>    | CTGCGCTAAACAACCTCAACGA   | GCAGATCCCTTTCAGAGCGG     |
| Mouse-<br><i>Notch2</i>   | ATGTGGACGAGTGTCTGTTGC    | GGAAGCATAGGCACAGTCATC    |
| Mouse-<br><i>Jagged 1</i> | CCTCGGGTCAGTTTGAGCTG     | CCTTGAGGCACACTTTGAAGTA   |
| Mouse-<br><i>Ccdn1</i>    | CGTGGCCTCTAAGATGAAGGA    | CCTCGGGCCGGATAGAGTAG     |
| Mouse-<br><i>Myc</i>      | TGTACCTCGTCCGATTCC       | CATCTTCTTGCTCTTCTTCAG    |
| Mouse-<br><i>Hes1</i>     | AAAGCCTATCATGGAGAAGAGGCG | GGAATGCCGGGAGCTATCTTTCTT |
| Mouse-<br><i>Hey1</i>     | GCGCGGACGAGAATGGAAA      | TCAGGTGATCCACAGTCATCTG   |
| Mouse-<br><i>Hey2</i>     | AAGCGCCCTTGTGAGGAAAC     | GGTAGTTGTCCGGTGAATTGGAC  |

### 3. Supplementary Material

The analysis included data from 58 patients with human intrahepatic cholangiocarcinoma (all with survival data). The variables have been analyzed using the Statistical Package for Social Science (SPSS, version 22.0, Chicago, IL, USA).

#### Descriptive statistics

| Sex    | Number (%) | Mean age (SD) | Mean survival (SD) |
|--------|------------|---------------|--------------------|
| Male   | 35 (60.3)  | 64.5 (13.0)   | 25.0 (15.7)        |
| Female | 23 (39.7)  | 66.3 (9.0)    | 28.2 (17.9)        |
| Total  | 58         | 65.3 (11.6)   | 26.3 (16.5)        |

#### Mean survival is 26.3 months (SD 16.5)

(Differences between males and females are not statistically significant)

| Sex    | Number (%) | Mean CTNNB1 mRNA (SD) |
|--------|------------|-----------------------|
| Male   | 35 (60.3)  | 0.420 (0.287)         |
| Female | 23 (39.7)  | 0.393 (0.236)         |
| Total  | 58         | 0.409 (0.266)         |

(The difference is not statistically significant)

#### CTNNB1 mRNA in human intrahepatic cholangiocarcinoma

Low and high *CTNNB1* mRNA values were recoded into binary variables (0/1) using the median values (*CTNNB1* mRNA = 0.353) as the cut-off. The whole dataset was then divided into 29 subjects with values of *CTNNB1* mRNA below the median and 29 subjects above the median.

Statistical comparison between the two groups was performed using the log-rank test:

| Marker              | Number of subjects (%) | Mean survival in months (SD) | Log-rank test |
|---------------------|------------------------|------------------------------|---------------|
| CTNNB1 mRNA < 0.353 | 29 (50.0)              | 35.7 (16.4)                  | –             |
| CTNNB1 mRNA ≥ 0.353 | 29 (50.0)              | 16.9 (10.3)                  | <0.0001       |
| Total               | 58                     | 26.3 (16.5)                  |               |

Conclusion 1: *patients with CTNNB1 mRNA values above the median 0.353 survive on average shorter than patients with CTNNB1 mRNA below 0.353 (see Kaplan-Meier curve)*

### Survival analysis (univariate)

| Variable                                                | Survival (months) (SD)                                  | P-value            |
|---------------------------------------------------------|---------------------------------------------------------|--------------------|
| <i>Age (years)</i><br>< 65<br>≥ 65                      | 25.3 (16.4)<br>27.1 (16.9)                              | 0.680              |
| <i>Sex</i><br>Female<br>Male                            | 28.2 (17.9)<br>25.0 (15.7)                              | 0.474              |
| <i>Cirrhosis</i><br>Yes<br>No                           | 26.6 (17.0)<br>25.7 (16.1)                              | 0.831              |
| <i>Etiology</i><br>HBV<br>HCV<br>Hepatolithiasis<br>PSC | 23.0 (19.3)<br>31.9 (13.4)<br>28.1 (15.2)<br>10.0 (2.8) | 0.496 <sup>#</sup> |
| <i>Diameter</i><br>< 5 cm<br>≥ 5 cm                     | 26.7 (17.6)<br>25.5 (14.9)                              | 0.784              |
| <i>Lymph Node Metastasis</i><br>No<br>Yes               | 33.0 (17.0)<br>19.4 (15.3)                              | <b>0.007</b>       |
| <i>Lung Metastasis</i><br>No<br>Yes                     | 30.3 (16.2)<br>10.8 (4.5)                               | <b>&lt;0.0001</b>  |
| <i>Differentiation</i><br>Well<br>Moderately<br>Poorly  | 25.7 (18.7)<br>24.1 (13.2)<br>34.2 (16.5)               | 0.326 <sup>#</sup> |
| <i>Tumor number</i><br>Single<br>Multiple               | 29.3 (16.1)<br>17.5 (15.0)                              | <b>0.016</b>       |
| <i>CTNNB1 mRNA</i><br>< 0.353<br>≥ 0.353                | 35.7 (16.4)<br>16.9 (10.3)                              | <b>&lt;0.0001</b>  |

#One-way ANOVA

A significant difference in survival was found in the univariate analysis for lymph node metastasis, lung metastasis, tumor number, and CTNNB1 mRNA above the median.

### Multivariable Cox regression analysis

A multivariable Cox proportional hazard model was created with survival as the outcome variable. CTNNB1 mRNA was included as a predictor together with the covariates (full model). Hazard ratios (HRs) and their 95% confidence intervals were calculated, and the Wald test was used for model testing.

| Covariates                         | Full model<br>(HR <sup>#</sup> and 95% CI) |
|------------------------------------|--------------------------------------------|
| Age ≥ 65 yrs                       | 1.483 (0.765–2.875)                        |
| Male sex                           | 0.958 (0.435–2.110)                        |
| Cirrhosis (y/n)                    | 2.351 (0.936–5.903)                        |
| <i>Etiology</i>                    | Reference                                  |
| HBV                                | 0.986 (0.242–4.021)                        |
| HCV                                | 1.038 (0.337–3.202)                        |
| Hepatolithiasis                    | 4.260 (0.735–24.70)                        |
| PSC                                |                                            |
| Size ≥ 5 cm                        | 1.075 (0.472–2.449)                        |
| <i>Lymph Node Metastasis</i>       | Reference                                  |
| No                                 | 2.771 (0.908–8.456)                        |
| Yes                                |                                            |
| <i>Lung Metastasis</i>             | Reference                                  |
| No                                 | 3.028 (0.975–9.404)                        |
| Yes                                |                                            |
| <i>Differentiation</i>             | Reference                                  |
| Well                               | 1.512 (0.656–3.484)                        |
| Moderately                         | 1.062 (0.303–3.722)                        |
| Poorly                             |                                            |
| <i>Tumor number</i>                | Reference                                  |
| Single                             | 0.734 (0.248–2.168)                        |
| Multiple                           |                                            |
| CTNNB1 mRNA ≥ 0.353 (median value) | 8.481 (2.920–24.63) **                     |

\*p<0.05; \*\*p<0.001

Conclusion: *Only CTNNB1 mRNA levels above the median were independent predictors of reduced survival in the whole model. The other variables did not show significant associations.*



## **4. Materials and Methods**

### **Constructs and Reagents**

Plasmids used for animal studies, including pT3-EF1a-HA-myr-Akt, pT3-EF1a-Flag-YapS127A, pT3-EF1a-Flag-YapS94A, pT3-EF1a, pT3-EF1a-dnTEAD2, pT3-EF5a-Tead2VP16, pT3-EF1a-Tead2VP16, pCMV, pCMV-Cre, pT3-EF1a-Myc-mNICD (NICD), pT3-EF1a-JAG1, pT3-EF1a-FAK, and pCMV-sleeping beauty transposase (pCMV/SB), were previously described<sup>4-7</sup>. Truncated Yap inserts, including Yap $\Delta$ (P+TBD), Yap $\Delta$ WW, Yap $\Delta$ SH3, Yap $\Delta$ (TAD+PDZ), and Yap $\Delta$ PDZ were obtained via overlap extension PCR and cloned into the pT3-EF1a vector. The AAV9.VGLL4-GFP construct was kindly provided by Dr. Zhiqiang Lin from Masonic Medical Research Institute (Utica, NY). The Myc-AXIN2 (#21279) construct was purchased from Addgene (Cambridge, MA). The VGLL4 and Myc-AXIN2 were then cloned into the pT3-EF1a vector to generate pT3-EF1a-MYC-VGLL4 and pT3-EF1a-MYC-AXIN2 plasmids. For cell studies, plasmids used in this project, including psPAX2(#12260), pMD2.G(#12259), plenti-EGFP (#17448), pLKO.1-sc (#10879) and pLKO.1-sh $\beta$ -Catenin (#18803), were purchased from Addgene. Additional plasmids include plenti-dnTEAD2, pCW57.1-dnTCF4, plenti-FLAG- $\beta$ -Catenin WT and pT3-EF1a-Myc- $\beta$ -Catenin WT. All plasmids were extracted using the Endotoxin Free Prep Kit (Sigma-Aldrich, St. Louis, MO, USA).

### **Histology, Hematoxylin-Eosin (H&E), and Immunohistochemistry (IHC)**

Mouse liver tissues were fixed in 10% Neutral Buffered Formalin (ThermoFisher Scientific, Waltham, MA) at 4°C overnight and then processed for paraffin embedding. Paraffined tissues were cut into sections at a thickness of 5  $\mu$ m for H&E or IHC staining. For H&E, sections were deparaffinized in xylene and stained with hematoxylin and eosin (ThermoFisher Scientific) following the standard protocol. For IHC, sections were heated in an oven at 60°C overnight. First, sections were deparaffinized in xylene, hydrated in 100%, 95%, 70%, and 50% alcohols, followed by antigen retrieval in 10mM sodium citrate buffer (pH 6.0). Next, sections were blocked in 10%

goat serum and Avidin-Biotin blocking kit (Vector Laboratories, Burlingame, CA) and then incubated with primary antibodies at 4°C overnight. The following day, sections were subjected to 3% H<sub>2</sub>O<sub>2</sub> to quench endogenous peroxidase activity, followed by incubation with secondary antibody at RT for 30min. Every step should be followed by washing three times in PBS for 5 min each. The Vectastain Elite ABC Kit (Vector Laboratories) and DAB substrate (Dako North America, Carpinteria, CA) were used to visualize the signal. Subsequently, sections were immersed in hematoxylin, dehydrated in graded alcohols, and covered-slipped with ClearMount mounting medium (StatLab, Lodi, CA). Antibodies used for IHC are listed in Sup. Table 5.

### **Protein Extraction and Western blotting (WB)**

Cell pellets or mouse liver tissues were homogenized and lysed in M-PER Mammalian Protein Extraction Reagent (Thermo Fisher Scientific) with the Halt™ Protease and Phosphatase Inhibitor Cocktail (Thermo Fisher Scientific) at a ratio of 100:1. Protein concentration was calculated using the Pierce BCA Protein Assay Kit (ThermoFisher Scientific). Next, proteins were denatured in sample buffer (Laemmli Sample buffer: β-ME=19:1) at 95°C for 5min and separated by sodium dodecyl sulfate–polyacrylamide gel electrophoresis. The gel was subsequently transferred onto nitrocellulose membranes (Bio-Rad Laboratories, Hercules, CA). The membranes were blocked in 10% nonfat milk diluted in Tris-buffered saline containing 0.1% Tween-20 (TBST) at room temperature for 1 hour and followed by incubation with primary antibodies at 4°C overnight. The following day, the membranes were incubated with horseradish peroxidase-conjugated secondary antibody (Jackson ImmunoResearch Laboratories Inc., West Grove, PA) at room temperature for 1 hour. After washing with TBST, membranes were developed with the Clarity Western ECL Substrate (Bio-Rad Laboratories). Antibodies used for WB are listed in Sup. Table 6.

### **RNA Extraction and Quantitative reverse transcription real-time polymerase chain reaction**

Total RNA extraction from mouse liver tissues or cells was performed using the Quick RNA Miniprep Kit (Zymo Research, Irvine, CA). RNA was converted to cDNA using the iScript™ Reverse Transcription Supermix (Bio-Rad). qRT-PCR was performed on the QuantStudio™6 Flex system (Applied Biosystems, Waltham, MA). Reactions were performed as follows: 1.0 ul primer mix, 5ul TaqMan Universal PCR Master Mix (ThermoFisher Scientific), 2.5ul cDNA (100 ng), and 2.1ul d2H2O. Cycling conditions were: polymerase activation at 95°C for 10 min, 40 cycles: denaturation at 95°C for 15 s, and extension at 60°C for 1 min. Primers for qRT-PCR were ordered from Integrated DNA Technologies (Coralville, IA) and listed in Sup. Table 8.

### **Immunofluorescence**

Deparaffinized liver tissue sections or cells plated in cover glasses were fixed with 4% formaldehyde (pH 7.4) for 15 min at room temperature. Next, sections or cells were treated with 0.1% Triton™ X-100 in PBS for 5 min at room temperature for permeabilization and blocked in 10% goat serum for 1 hour. After blocking, sections or cells were incubated with primary antibodies overnight at 4°C and subsequently incubated with the fluorochrome-conjugated secondary antibody for 1 hour at room temperature. Every step was followed by washing three times in PBS for 5 min each. Finally, sections or cells were counterstained with DAPI (Millipore) for imaging. Antibodies detailed information is listed in Sup. Table 7.

### **Colony formation assay**

Stable lentivirus transfected RBE, HUCCT-1, and KKU156 cells were plated in triplicate at densities of 1000 to 2000 cells per well in a 6-well culture plate, respectively. Cells were cultured with puromycin-containing DMEM medium for two weeks. Cell colonies were fixed, stained with 0.2% crystal violet solution, and counted for quantification.

### **Co-immunoprecipitation (co-IP)**

RBE and KKKU156 cells were transfected with pT3-EF1 $\alpha$ -Flag-YapS127A plasmid. RBE cells overexpressed with Flag tagged wildtype  $\beta$ -Catenin were obtained by lentiviral transduction of plenti-Flag- $\beta$ -Catenin-WT plasmid. Cells were lysed in IP Lysis Buffer (#26149, ThermoFisher Scientific) containing Halt™ Protease and Phosphatase Inhibitor Cocktail (#78446, ThermoFisher Scientific). Akt/Yap iCCA tumors and human iCCA tissues obtained from West China Hospital were homogenized and lysed in IP Lysis Buffer. Lysates were subjected to immunoprecipitation with the indicated antibody using the Pierce Co-Immunoprecipitation Kit (#26149, ThermoFisher Scientific), following the manufacturer's instructions. YAP (#14074, Cell Signaling Technology),  $\beta$ -Catenin (#610153, BD Biosciences) and FLAG (#AF519, Beyotime) antibodies were used to immunoprecipitate the antigen (bait protein). Rabbit or mouse IgG was used as a control. Co-precipitating proteins were detected by Western blotting. Human surrounding non-tumorous livers and iCCA tissues obtained from Pittsburgh Liver Research Center were homogenized in RIPA buffer premixed with fresh protease and phosphatase inhibitor cocktails. The concentration of the protein was determined by the bicinchoninic acid assay. For immunoprecipitation, 1mg of human liver lysate was precleared with 40 $\mu$ l of Protein A/G PLUS-Agarose (sc-2003, Santa Cruz Biotechnology) for 2 hours at 4°C. After centrifugation (3,000 rpm, 1 minute), the supernatant was incubated with YAP antibody (#14074, Cell Signaling Technology, 1:100) or control IgG overnight at 4°C. The next day, samples were incubated with 40 $\mu$ l of Protein A/G PLUS-Agarose for 2 hours at 4°C. The pellet was collected, washed with RIPA buffer for three times, resuspended in 20 $\mu$ l of loading buffer, and subjected to western blotting.

For the Yap structure-function study, HEK-293FT cells were co-transfected pT3-EF1 $\alpha$ -Myc- $\beta$ -Catenin WT plasmid with either full length or truncated Flag-YapS127A mutants and lysed in IP Lysis Buffer (ThermoFisher Scientific). *Akt/Yap*, *Akt/Yap $\Delta$ WW*, *Akt/Yap $\Delta$ SH3*, or *Akt/Yap $\Delta$ PDZ* iCCA tumors were homogenized and lysed in IP Lysis Buffer. Following the manufacturer's

instructions, lysates were subjected to immunoprecipitation with Anti-FLAG M2 magnetic beads (M8823, Sigma-Aldrich).

For YAP/ $\beta$ -Catenin cytoplasmic and nuclear interaction detection, *Akt/Yap* iCCA tumors were homogenized and isolated using the NE-PER™ Nuclear and Cytoplasmic Extraction Reagents (#78833, ThermoFisher Scientific), following the manufacturer's instructions. The cytoplasmic and nuclear fractions were next subjected to immunoprecipitation with anti-FLAG M2 magnetic beads. Next, binding proteins were eluted in elution buffer and followed by western blotting analysis.

### **RNA Sequencing Analysis**

Human RBE cells were subjected to transfection with lentivirus (pLKO.1-shCon or pLKO.1-sh $\beta$ -Catenin; pCW57.1-dnTCF4 followed by incubation with vehicle or doxycycline) and *siRNA* (*siCon* or *siYAP/TAZ*). Total RNA was extracted from RBE cells, murine normal liver (NL), *Akt/Yap* (AY), *Akt/Tead2VP16* (AT) and *Ctnnb1<sup>flox/flox</sup> Akt/Yap/Cre* (BAY) tumor tissues. RNA sample quality was detected using Bioanalyzer (Agilent, Santa Clara, CA). Values of RNA integrity number (RIN) above 6.8 are required for RNA Sequencing. RNA samples that met the standard were submitted for RNA sequencing. Library preparation and sequencing were performed by Novogene (Sacramento, CA). Reads quality was controlled by fastqc (v0.11.7). The controlled reads were then aligned to the respective genome (human reference genome version 38 [hg38], *Mus Musculus* [GRCm38/mm10]). Genes' Ensembl IDs were converted to Entrez ID by the Bioconductor Package Maintainer org.Hs.eg.db (version 3.8.2). After removing the duplicated genes, the fragments per kilobase of transcript per million mapped reads were calculated and analyzed using the Edge R package (version 3.28.1). The Venn diagram and heatmap were generated by the VennDiagram package and ComplexHeatmap package, respectively.

## References

1. Callus BA, Finch-Edmondson ML, Fletcher S, et al. YAPping about and not forgetting TAZ. *FEBS Lett* 2019;593:253-276.
2. Kulman JD, Harris JE, Xie L, et al. Proline-rich Gla protein 2 is a cell-surface vitamin K-dependent protein that binds to the transcriptional coactivator Yes-associated protein. *Proc Natl Acad Sci U S A* 2007;104:8767-72.
3. **Chang L, Azzolin L, Di Biagio D**, et al. The SWI/SNF complex is a mechanoregulated inhibitor of YAP and TAZ. *Nature* 2018;563:265-269.
4. **Zhang S, Song X, Cao D, Xu Z**, et al. Pan-mTOR inhibitor MLN0128 is effective against intrahepatic cholangiocarcinoma in mice. *J Hepatol* 2017;67:1194-1203.
5. **Fan B, Malato Y, Calvisi DF**, et al. Cholangiocarcinomas can originate from hepatocytes in mice. *J Clin Invest* 2012;122:2911-5.
6. **Zhang J, Liu P**, Tao J, et al. TEA Domain Transcription Factor 4 Is the Major Mediator of Yes-Associated Protein Oncogenic Activity in Mouse and Human Hepatoblastoma. *Am J Pathol* 2019;189:1077-1090.
7. Tschaharganeh DF, Chen X, Latzko P, et al. Yes-associated protein up-regulates Jagged-1 and activates the Notch pathway in human hepatocellular carcinoma. *Gastroenterology* 2013;144:1530-1542 e12.

Author names in bold designate shared co-first authorship.
